# Supplementary material for: Isolation, Identification, and Antibacterial Properties of Prodigiosin, a Bioactive Product Produced by a New Serratia marcescens JSSCPM1 Strain: Exploring the Biosynthetic Gene Clusters of Serratia Species for Biological Applications
Source: MDPI journal article supplement (doi:10.3390/antibiotics12091466), 2023-09-20
Supplement: s1 [file s1]

# Isolation, Identification, and Antibacterial Properties of Prodigiosin, a Bioactive Product Produced by a New *Serratia marcescens* JSSCPM1 Strain: Exploring the Biosynthetic Gene Clusters of *Serratia* Species for Biological Applications

Rajaguru Arivuselvam <sup>1,2</sup>, Ayed A Dera <sup>3</sup>, Syed Parween Ali <sup>3</sup>, Yasser Alraey <sup>3</sup>, Ahmed Saif <sup>4</sup>, Umme Hani <sup>5</sup>, Sivaa Arumugam Ramakrishnan <sup>1,2</sup>, Mohamed Sheik Tharik Abdul Azeeze <sup>6</sup>, Raman Rajeshkumar <sup>1,\*</sup>, Aishwarya S <sup>7</sup>, Haritha H <sup>7</sup> and B.R. Prashantha Kumar <sup>7,\*</sup>

- <sup>1</sup> Department of Pharmaceutical Biotechnology, JSS College of Pharmacy, JSS Academy of Higher Education & Research, Ooty 643001, TN, India; [arajaguru@jssuni.edu.in](mailto:arajaguru@jssuni.edu.in) (R.A.); [siarvinayaga@gmail.com](mailto:siarvinayaga@gmail.com) (S.A.R.)
  - <sup>2</sup> Department of Pharmaceutical Biotechnology, JSS College of Pharmacy, JSS Academy of Higher Education & Research, Sri Shivarathreeshwara Nagar, Mysore 570015, KA, India
  - <sup>3</sup> Department of Clinical Laboratory Sciences, Central Research Laboratory, College of Applied Medical Sciences, King Khalid University, Abha 62529, Saudi Arabia; [ayedd@kku.edu.sa](mailto:ayedd@kku.edu.sa) (A.A.D.); [sabali@kku.edu.sa](mailto:sabali@kku.edu.sa) (S.P.A.); [yahamd@kku.edu.sa](mailto:yahamd@kku.edu.sa) (Y.A.)
  - <sup>4</sup> Department of Clinical Laboratory Sciences, College of Applied Medical Sciences, King Khalid University, Abha 62529, Saudi Arabia; [amsaif8080@gmail.com](mailto:amsaif8080@gmail.com)
  - <sup>5</sup> Department of Pharmaceutics, College of Pharmacy, King Khalid University, Guraiger, Abha 62529, Saudi Arabia; [uahmed@kku.edu.sa](mailto:uahmed@kku.edu.sa)
  - <sup>6</sup> Department of Pharmaceutical Analysis, College of Pharmacy, JSS Academy of Technical Education, Noida 201301, UP, India; [mtharik@jssaten.ac.in](mailto:mtharik@jssaten.ac.in)
  - <sup>7</sup> Department of Pharmaceutical Chemistry, JSS College of Pharmacy, JSS Academy of Higher Education & Research, Sri Shivarathreeshwara Nagar, Mysore 570015, KA, India; [aishwaryasusil31@gmail.com](mailto:aishwaryasusil31@gmail.com) (A.S.); [harithadd3@gmail.com](mailto:harithadd3@gmail.com) (H.H.)
- \* Correspondence: [1ramanbiotech@gmail.com](mailto:1ramanbiotech@gmail.com), [bathmic@jssuni.edu.in](mailto:bathmic@jssuni.edu.in) (R.R.); [brprashanthkumar@jssuni.edu.in](mailto:brprashanthkumar@jssuni.edu.in) (B.R.P.K.)

## Supplementary files

# **Annexure – I**

Biochemical test identification results of  
JSSCPM1 strain.

**Biochemical test identification results of JSSCPM1 strain**

| Test                                                                       | JSSCPM1 strain | <i>S. marcescens</i> |
|----------------------------------------------------------------------------|----------------|----------------------|
| Indole production test                                                     | +              | +                    |
| Nitrate reduction test                                                     | +              | +                    |
| Catalase                                                                   | +              | +                    |
| Methyl red test                                                            | -              | -                    |
| Glucose fermentation gas production test                                   | +              | +                    |
| Voges-Proskauert test                                                      | +              | +                    |
| Urease                                                                     | +              | +                    |
| Oxidase                                                                    | -              | -                    |
| Acid production test (L-arabinose, D-xylose and cotton sugar fermentation) | -              | -                    |

**Note: Positive (+), (-) negative**

## **Annexure – II**

Phylogenetic tree of *S. marcescens* JSSCPM1 strain and its twelve closest neighbours.

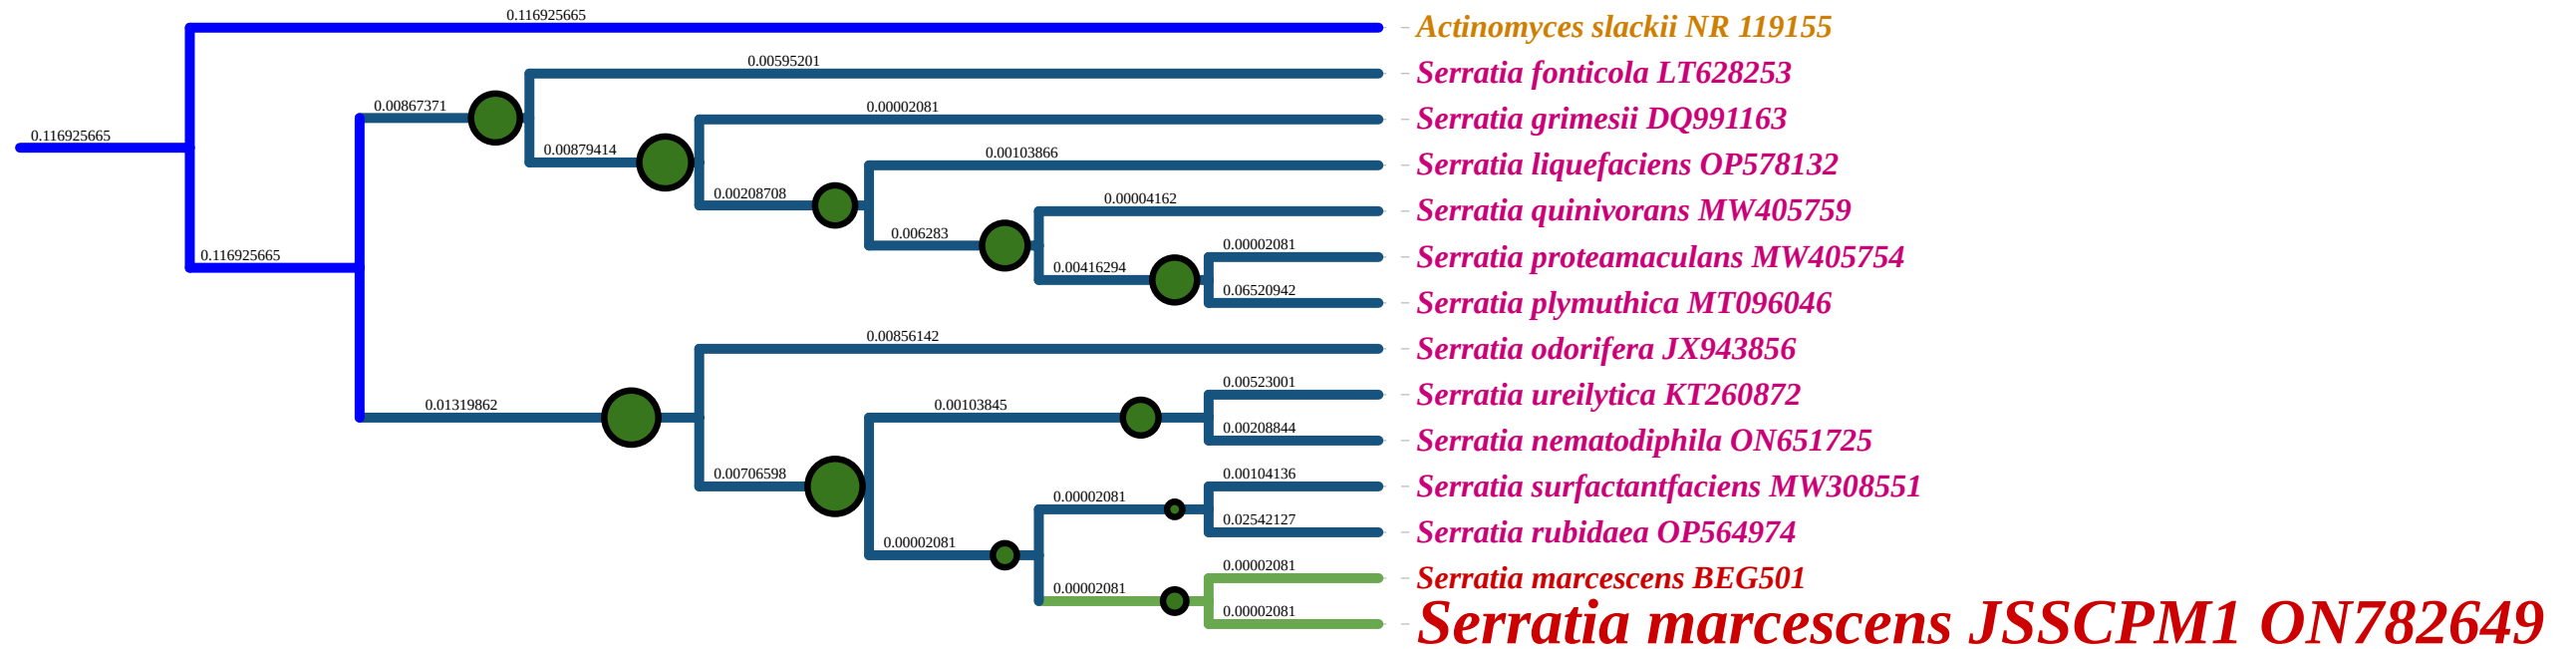

# **Annexure – III**

UV absorption spectrum of PG compound

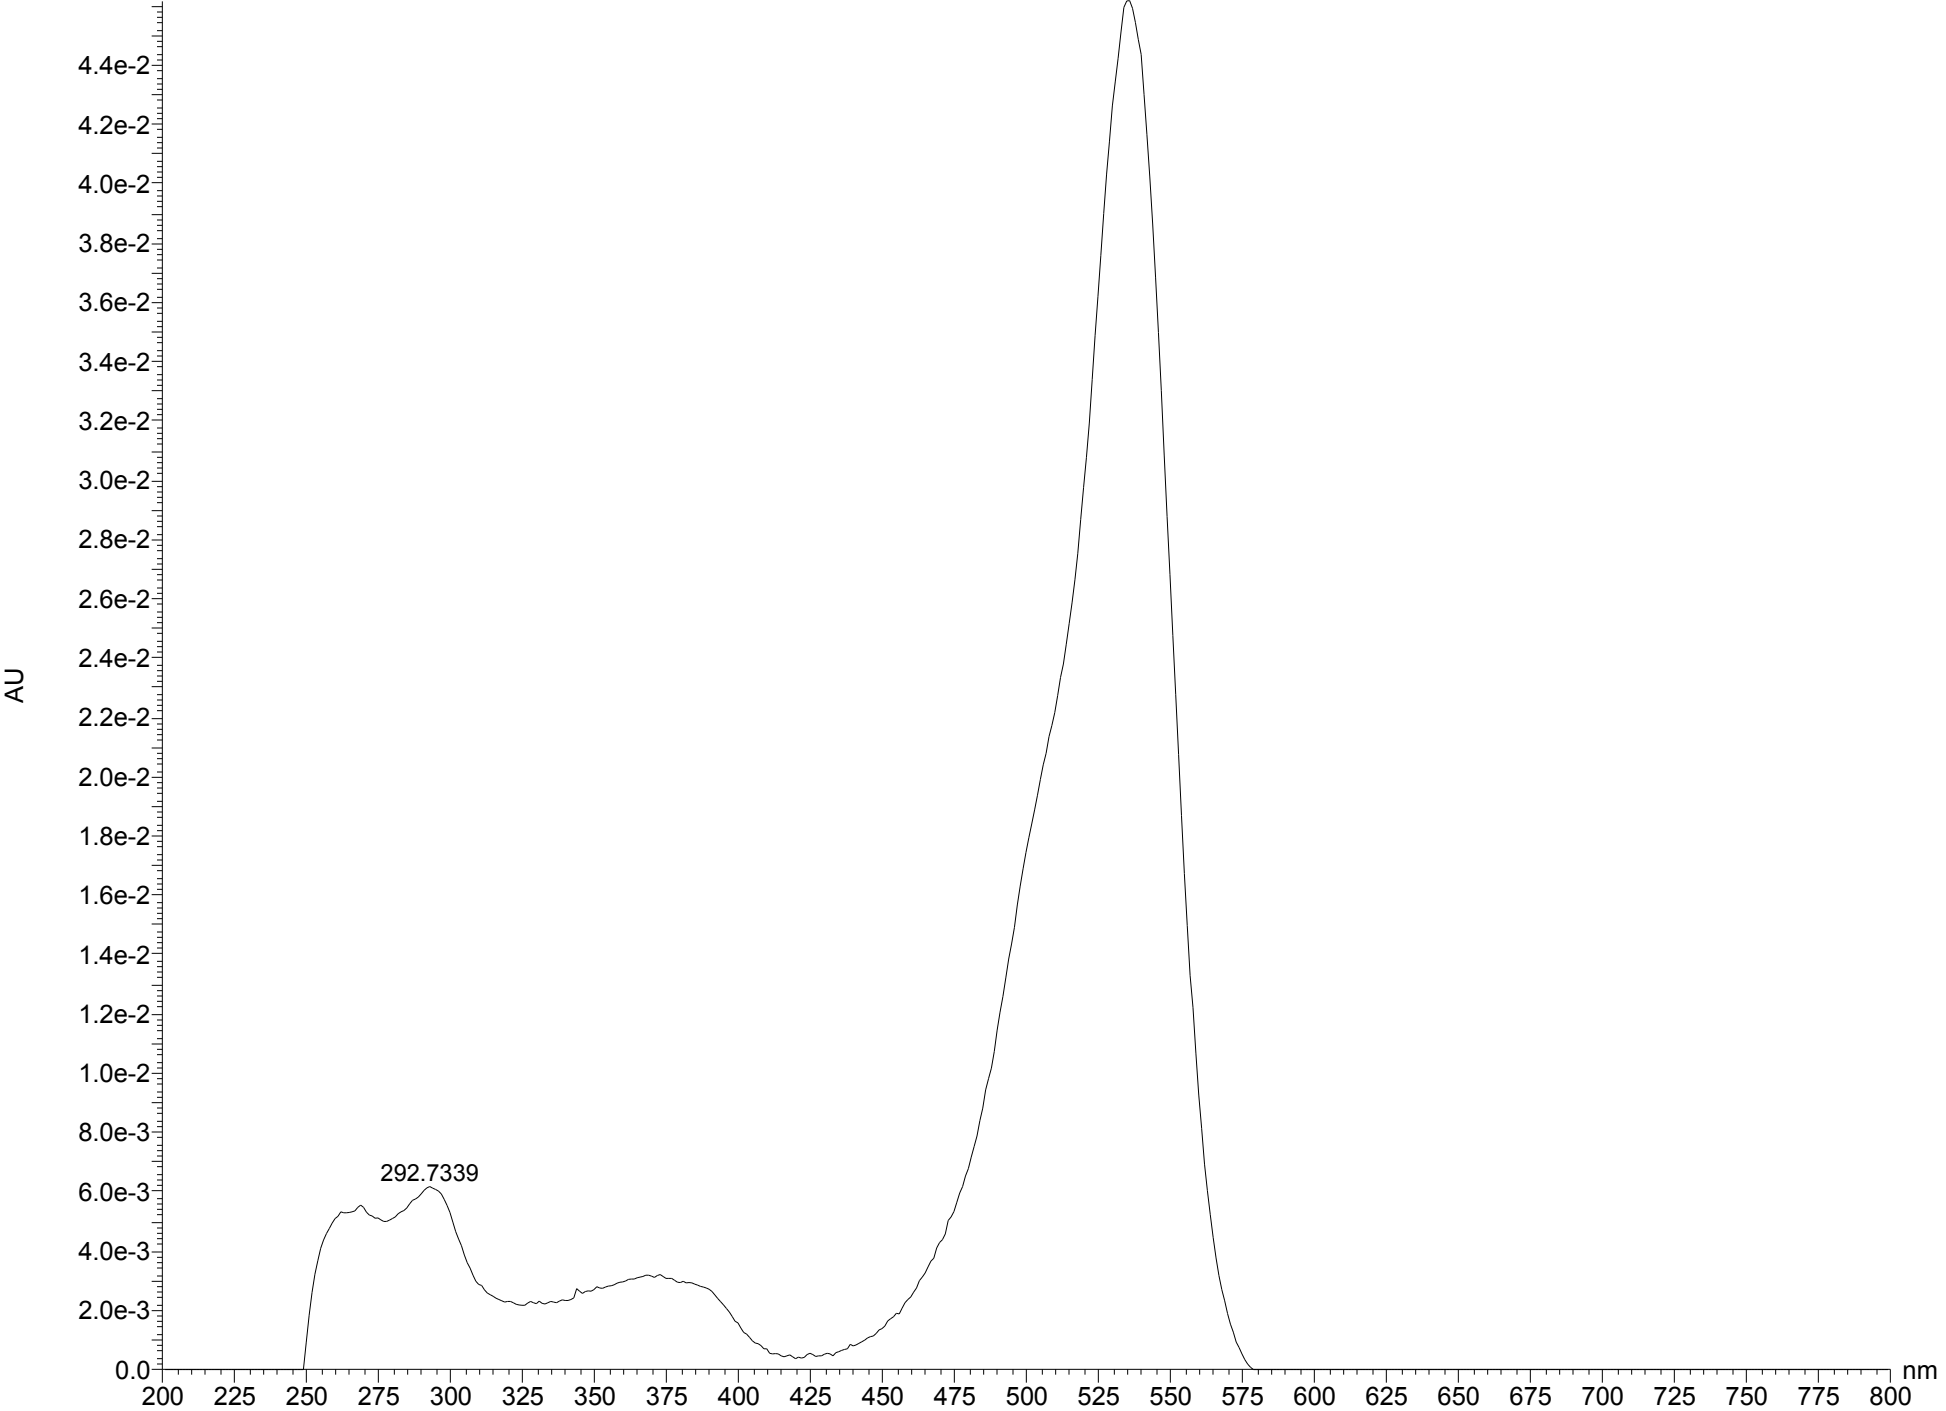

# **Annexure – IV**

**HPLC report of PG compound**



VA2208003-RR

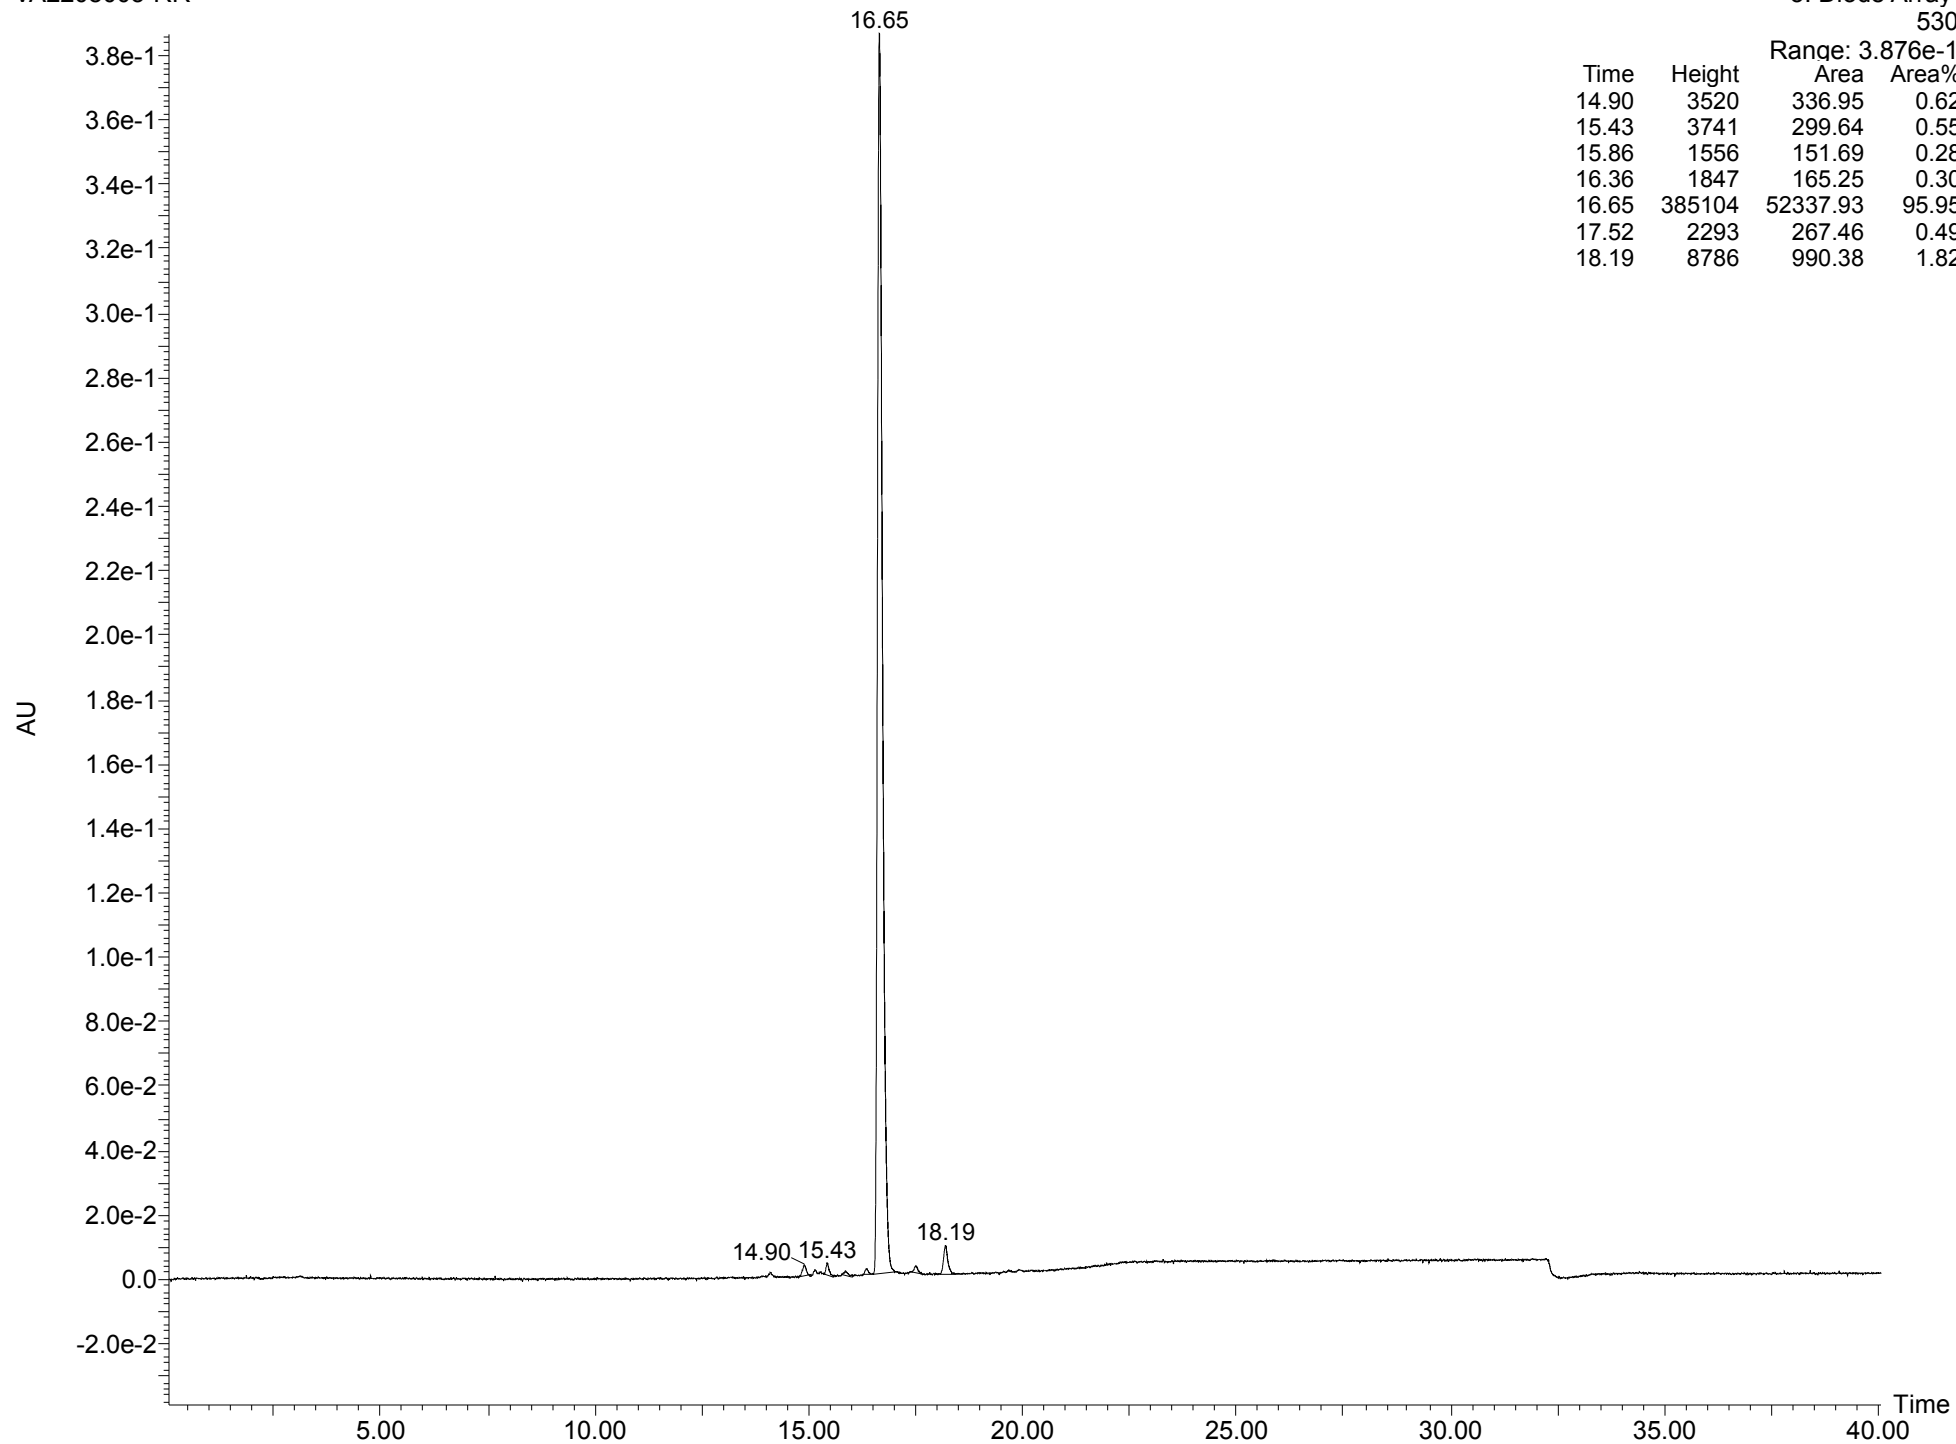

# **Annexure – V**

## **LC-MS analysis of PG Compound**

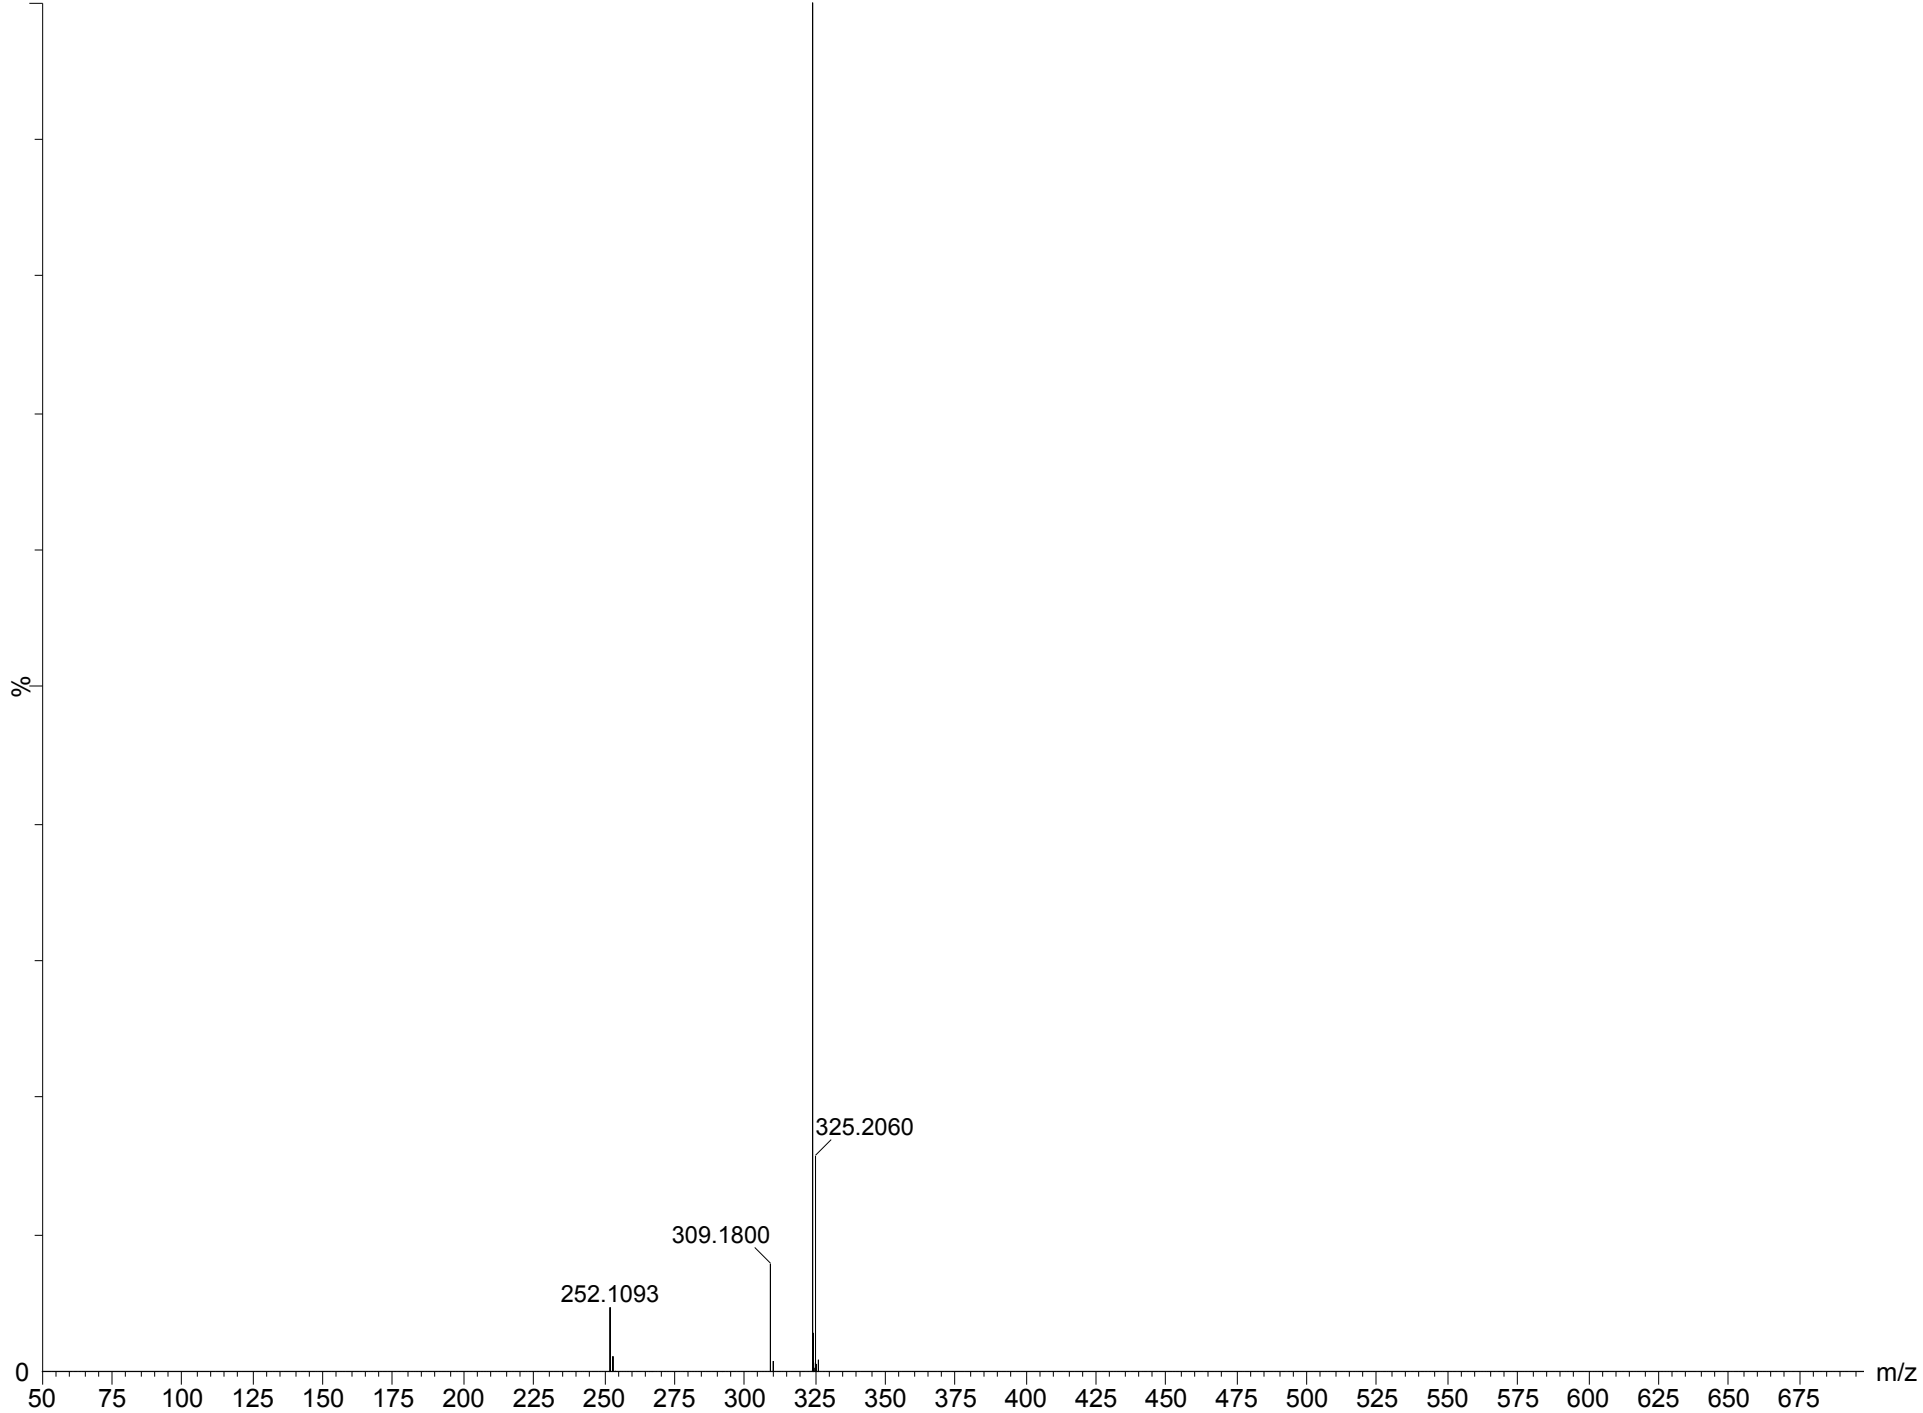

# **Annexure –VI**

**$^1\text{H}$  and  $^{13}\text{C}$  NMR report of PG compound**

# Sample RR NRM Report:

## Bruker 400MHz NMR

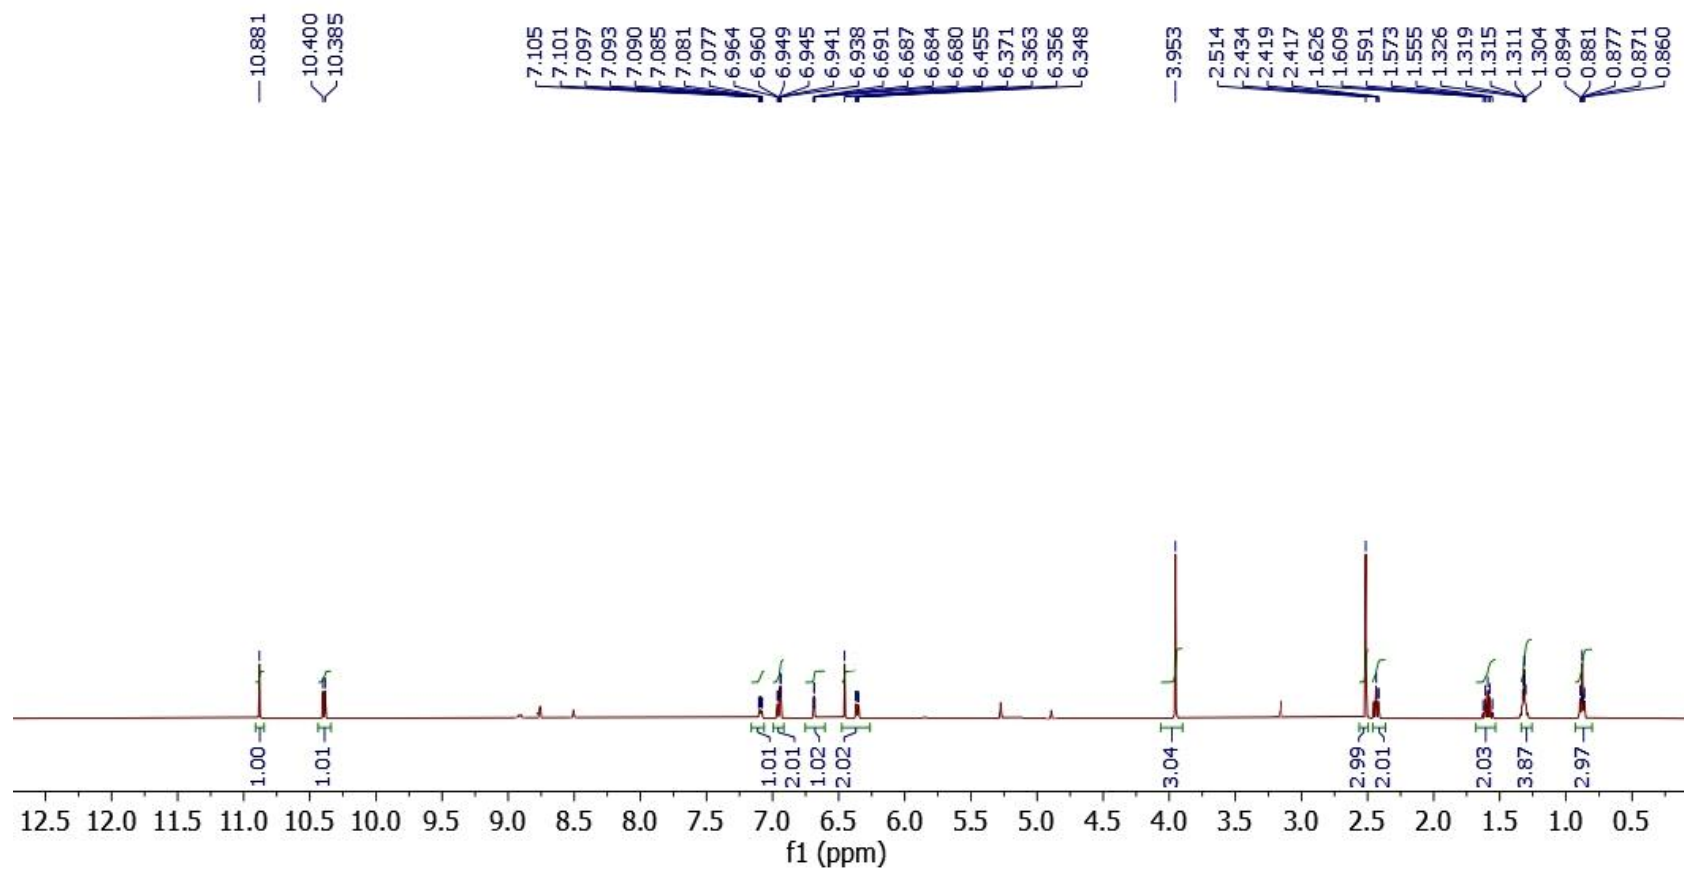

1H NMR Spectrum of Sample RR

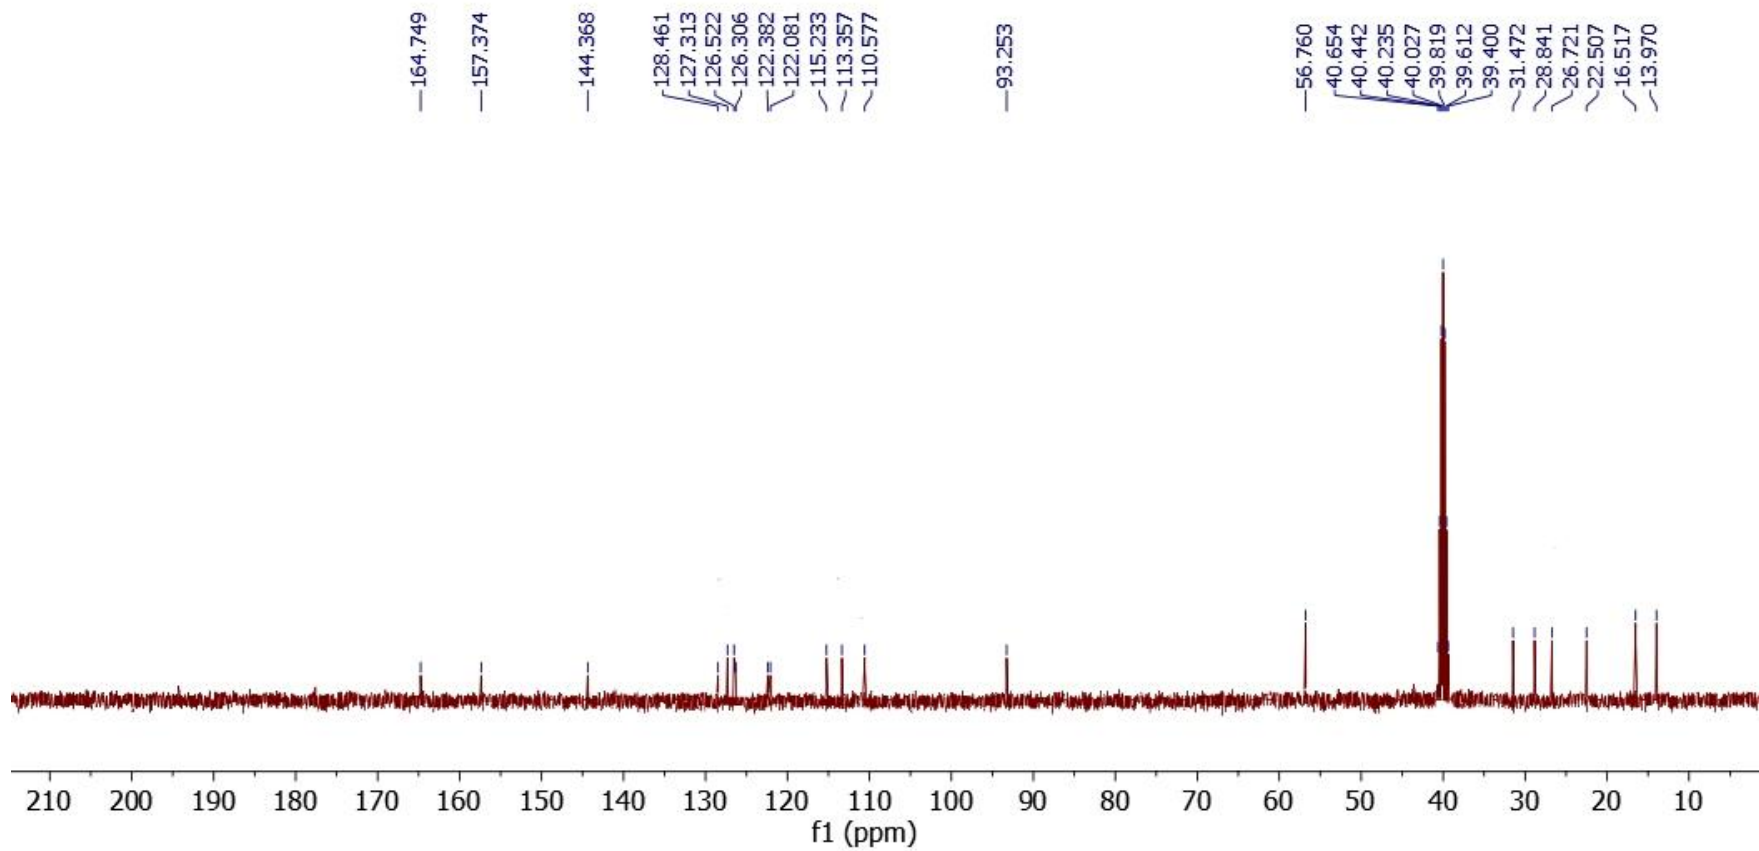

**<sup>13</sup>C NMR Spectrum of Sample RR**

## **Annexure – VII**

**Total 122 chromosomal genomes of *S. marcescens*, *Serratia* *sp.*, and *Serratia nematodiphila* used in this study, along with their name, GenBank accession number and unique database links.**

| Sl.NO | Species name                                                                                                      | GenBank<br>Accession<br>number | Genome database link                                                                                          |
|-------|-------------------------------------------------------------------------------------------------------------------|--------------------------------|---------------------------------------------------------------------------------------------------------------|
| 1     | <i>Serratia marcescens</i> strain M158-1-1 chromosome, complete genome                                            | CP060440.1                     | <a href="https://www.ncbi.nlm.nih.gov/nuccore/CP060440.1">https://www.ncbi.nlm.nih.gov/nuccore/CP060440.1</a> |
| 2     | <i>Serratia marcescens</i> strain MGH246 chromosome                                                               | CP060487.1                     | <a href="https://www.ncbi.nlm.nih.gov/nuccore/CP060487.1">https://www.ncbi.nlm.nih.gov/nuccore/CP060487.1</a> |
| 3     | <i>Serratia marcescens</i> strain MV-u1-SK1-O chromosome, complete genome                                         | CP085860.1                     | <a href="https://www.ncbi.nlm.nih.gov/nuccore/CP085860.1">https://www.ncbi.nlm.nih.gov/nuccore/CP085860.1</a> |
| 4     | <i>Serratia marcescens</i> strain N10A28 chromosome, complete genome                                              | CP033623.1                     | <a href="https://www.ncbi.nlm.nih.gov/nuccore/CP033623.1">https://www.ncbi.nlm.nih.gov/nuccore/CP033623.1</a> |
| 5     | <i>Serratia marcescens</i> strain N4-5 chromosome, complete genome                                                | CP031316.1                     | <a href="https://www.ncbi.nlm.nih.gov/nuccore/CP031316.1">https://www.ncbi.nlm.nih.gov/nuccore/CP031316.1</a> |
| 6     | <i>Serratia marcescens</i> strain RH10 chromosome, complete genome                                                | CP092461.1                     | <a href="https://www.ncbi.nlm.nih.gov/nuccore/CP092461.1">https://www.ncbi.nlm.nih.gov/nuccore/CP092461.1</a> |
| 7     | <i>Serratia marcescens</i> strain RSC-14, complete genome                                                         | CP012639.1                     | <a href="https://www.ncbi.nlm.nih.gov/nuccore/CP012639.1">https://www.ncbi.nlm.nih.gov/nuccore/CP012639.1</a> |
| 8     | <i>Serratia marcescens</i> strain S2I7 genome                                                                     | CP021984.1                     | <a href="https://www.ncbi.nlm.nih.gov/nuccore/CP021984.1">https://www.ncbi.nlm.nih.gov/nuccore/CP021984.1</a> |
| 9     | <i>Serratia marcescens</i> strain SARVS06 chromosome, complete genome                                             | CP110102.1                     | <a href="https://www.ncbi.nlm.nih.gov/nuccore/CP110102.1">https://www.ncbi.nlm.nih.gov/nuccore/CP110102.1</a> |
| 10    | <i>Serratia marcescens</i> strain SASK1000 chromosome, complete genome                                            | CP100753.1                     | <a href="https://www.ncbi.nlm.nih.gov/nuccore/CP100753.1">https://www.ncbi.nlm.nih.gov/nuccore/CP100753.1</a> |
| 11    | <i>Serratia marcescens</i> strain 12/2010 chromosome, complete genome                                             | CP053925.1                     | <a href="https://www.ncbi.nlm.nih.gov/nuccore/CP053925.1">https://www.ncbi.nlm.nih.gov/nuccore/CP053925.1</a> |
| 12    | <i>Serratia marcescens</i> strain 1274 chromosome, partial genome                                                 | CP019927.2                     | <a href="https://www.ncbi.nlm.nih.gov/nuccore/CP019927.2">https://www.ncbi.nlm.nih.gov/nuccore/CP019927.2</a> |
| 13    | <i>Serratia marcescens</i> strain 1602 chromosome, complete genome                                                | CP047391.1                     | <a href="https://www.ncbi.nlm.nih.gov/nuccore/CP047391.1">https://www.ncbi.nlm.nih.gov/nuccore/CP047391.1</a> |
| 14    | <i>Serratia marcescens</i> strain 1912768R chromosome, complete genome                                            | CP040350.1                     | <a href="https://www.ncbi.nlm.nih.gov/nuccore/CP040350.1">https://www.ncbi.nlm.nih.gov/nuccore/CP040350.1</a> |
| 15    | <i>Serratia marcescens</i> strain 2838 chromosome, complete genome                                                | CP047685.1                     | <a href="https://www.ncbi.nlm.nih.gov/nuccore/CP047685.1">https://www.ncbi.nlm.nih.gov/nuccore/CP047685.1</a> |
| 16    | <i>Serratia marcescens</i> strain 3024 chromosome, complete genome                                                | CP047682.1                     | <a href="https://www.ncbi.nlm.nih.gov/nuccore/CP047682.1">https://www.ncbi.nlm.nih.gov/nuccore/CP047682.1</a> |
| 17    | <i>Serratia marcescens</i> strain 332 chromosome, complete genome                                                 | CP021164.1                     | <a href="https://www.ncbi.nlm.nih.gov/nuccore/CP021164.1">https://www.ncbi.nlm.nih.gov/nuccore/CP021164.1</a> |
| 18    | <i>Serratia marcescens</i> strain 4201 chromosome, complete genome                                                | CP047679.1                     | <a href="https://www.ncbi.nlm.nih.gov/nuccore/CP047679.1">https://www.ncbi.nlm.nih.gov/nuccore/CP047679.1</a> |
| 19    | <i>Serratia marcescens</i> strain 95 chromosome, complete genome                                                  | CP020503.1                     | <a href="https://www.ncbi.nlm.nih.gov/nuccore/CP020503.1">https://www.ncbi.nlm.nih.gov/nuccore/CP020503.1</a> |
| 20    | <i>Serratia marcescens</i> strain UMH3 chromosome, complete genome                                                | CP018925.1                     | <a href="https://www.ncbi.nlm.nih.gov/nuccore/CP018925.1">https://www.ncbi.nlm.nih.gov/nuccore/CP018925.1</a> |
| 21    | <i>Serratia marcescens</i> strain UMH5 chromosome, complete genome                                                | CP018917.1                     | <a href="https://www.ncbi.nlm.nih.gov/nuccore/CP018917.1">https://www.ncbi.nlm.nih.gov/nuccore/CP018917.1</a> |
| 22    | <i>Serratia marcescens</i> strain UMH6 chromosome, complete genome                                                | CP018926.1                     | <a href="https://www.ncbi.nlm.nih.gov/nuccore/CP018926.1">https://www.ncbi.nlm.nih.gov/nuccore/CP018926.1</a> |
| 23    | <i>Serratia marcescens</i> strain UMH7 chromosome, complete genome                                                | CP018919.1                     | <a href="https://www.ncbi.nlm.nih.gov/nuccore/CP018919.1">https://www.ncbi.nlm.nih.gov/nuccore/CP018919.1</a> |
| 24    | <i>Serratia marcescens</i> strain UMH8 chromosome, complete genome                                                | CP018927.1                     | <a href="https://www.ncbi.nlm.nih.gov/nuccore/CP018927.1">https://www.ncbi.nlm.nih.gov/nuccore/CP018927.1</a> |
| 25    | <i>Serratia marcescens</i> strain UMH9 chromosome, complete genome                                                | CP018923.1                     | <a href="https://www.ncbi.nlm.nih.gov/nuccore/CP018923.1">https://www.ncbi.nlm.nih.gov/nuccore/CP018923.1</a> |
| 26    | <i>Serratia marcescens</i> strain SJC1048 genome assembly, chromosome: 1                                          | OX291586.1                     | <a href="https://www.ncbi.nlm.nih.gov/nuccore/OX291586.1">https://www.ncbi.nlm.nih.gov/nuccore/OX291586.1</a> |
| 27    | <i>Serratia marcescens</i> strain SJC1050 genome assembly, chromosome: 1                                          | OX291796.1                     | <a href="https://www.ncbi.nlm.nih.gov/nuccore/OX291796.1">https://www.ncbi.nlm.nih.gov/nuccore/OX291796.1</a> |
| 28    | <i>Serratia marcescens</i> strain SJC1051 genome assembly, chromosome: 1                                          | OX291746.1                     | <a href="https://www.ncbi.nlm.nih.gov/nuccore/OX291746.1">https://www.ncbi.nlm.nih.gov/nuccore/OX291746.1</a> |
| 29    | <i>Serratia marcescens</i> strain SJC1052 genome assembly, chromosome: 1                                          | OX291705.1                     | <a href="https://www.ncbi.nlm.nih.gov/nuccore/OX291705.1">https://www.ncbi.nlm.nih.gov/nuccore/OX291705.1</a> |
| 30    | <i>Serratia marcescens</i> strain SJC1054 genome assembly, chromosome: 1                                          | OX291528.1                     | <a href="https://www.ncbi.nlm.nih.gov/nuccore/OX291705.1">https://www.ncbi.nlm.nih.gov/nuccore/OX291705.1</a> |
| 31    | <i>Serratia marcescens</i> subsp. <i>marcescens</i> ATCC 13880 substr. Sm_S97_jyu2015 chromosome, complete genome | CP071202.1                     | <a href="https://www.ncbi.nlm.nih.gov/nuccore/CP071202.1">https://www.ncbi.nlm.nih.gov/nuccore/CP071202.1</a> |



|    |                                                                                                                  |            |                                                                                                                 |
|----|------------------------------------------------------------------------------------------------------------------|------------|-----------------------------------------------------------------------------------------------------------------|
| 32 | <i>Serratia marcescens</i> subsp. <i>marcescens</i> ATCC 13880 substr. Sm_S9_jyu2015 chromosome, complete genome | CP071238.1 | <a href="https://www.ncbi.nlm.nih.gov/nuccore/CP071238.1/">https://www.ncbi.nlm.nih.gov/nuccore/CP071238.1/</a> |
| 33 | <i>Serratia marcescens</i> subsp. <i>marcescens</i> ATCC 13880 substr. Sm_SA_jyu2015 chromosome, complete genome | CP071214.1 | <a href="https://www.ncbi.nlm.nih.gov/nuccore/CP071214.1/">https://www.ncbi.nlm.nih.gov/nuccore/CP071214.1/</a> |
| 34 | <i>Serratia marcescens</i> subsp. <i>marcescens</i> Db11, complete genome                                        | HG326223.1 | <a href="https://www.ncbi.nlm.nih.gov/nuccore/HG326223.1/">https://www.ncbi.nlm.nih.gov/nuccore/HG326223.1/</a> |
| 35 | <i>Serratia marcescens</i> WW4, complete genome                                                                  | CP003959.1 | <a href="https://www.ncbi.nlm.nih.gov/nuccore/CP003959.1/">https://www.ncbi.nlm.nih.gov/nuccore/CP003959.1/</a> |
| 36 | <i>Serratia nematodiphila</i> strain DH-S01 chromosome, complete genome                                          | CP038662.1 | <a href="https://www.ncbi.nlm.nih.gov/nuccore/CP038662.1/">https://www.ncbi.nlm.nih.gov/nuccore/CP038662.1/</a> |
| 37 | <i>Serratia</i> sp. FDAARGOS_506 chromosome, complete genome                                                     | CP033831.1 | <a href="https://www.ncbi.nlm.nih.gov/nuccore/CP033831.1/">https://www.ncbi.nlm.nih.gov/nuccore/CP033831.1/</a> |
| 38 | <i>Serratia</i> sp. FS14, complete genome                                                                        | CP005927.1 | <a href="https://www.ncbi.nlm.nih.gov/nuccore/CP005927.1/">https://www.ncbi.nlm.nih.gov/nuccore/CP005927.1/</a> |
| 39 | <i>Serratia</i> sp. HRI chromosome, complete genome                                                              | CP083690.1 | <a href="https://www.ncbi.nlm.nih.gov/nuccore/CP083690.1/">https://www.ncbi.nlm.nih.gov/nuccore/CP083690.1/</a> |
| 40 | <i>Serratia</i> sp. JKS000199 genome assembly, chromosome: I                                                     | LT907843.1 | <a href="https://www.ncbi.nlm.nih.gov/nuccore/LT907843.1/">https://www.ncbi.nlm.nih.gov/nuccore/LT907843.1/</a> |
| 41 | <i>Serratia</i> sp. LS-1 chromosome, complete genome                                                             | CP033504.1 | <a href="https://www.ncbi.nlm.nih.gov/nuccore/CP033504.1/">https://www.ncbi.nlm.nih.gov/nuccore/CP033504.1/</a> |
| 42 | <i>Serratia</i> sp. SSNIH1 chromosome, complete genome                                                           | CP026383.1 | <a href="https://www.ncbi.nlm.nih.gov/nuccore/CP026383.1/">https://www.ncbi.nlm.nih.gov/nuccore/CP026383.1/</a> |
| 43 | <i>Serratia marcescens</i> strain UMH1 chromosome, complete genome                                               | CP018915.1 | <a href="https://www.ncbi.nlm.nih.gov/nuccore/CP018915.1/">https://www.ncbi.nlm.nih.gov/nuccore/CP018915.1/</a> |
| 44 | <i>Serratia marcescens</i> strain UMH10 chromosome, complete genome                                              | CP018928.1 | <a href="https://www.ncbi.nlm.nih.gov/nuccore/CP018928.1/">https://www.ncbi.nlm.nih.gov/nuccore/CP018928.1/</a> |
| 45 | <i>Serratia marcescens</i> strain UMH11 chromosome, complete genome                                              | CP018929.1 | <a href="https://www.ncbi.nlm.nih.gov/nuccore/CP018929.1/">https://www.ncbi.nlm.nih.gov/nuccore/CP018929.1/</a> |
| 46 | <i>Serratia marcescens</i> strain UMH12 chromosome, complete genome                                              | CP018930.1 | <a href="https://www.ncbi.nlm.nih.gov/nuccore/CP018930.1/">https://www.ncbi.nlm.nih.gov/nuccore/CP018930.1/</a> |
| 47 | <i>Serratia marcescens</i> strain UMH2 chromosome, complete genome                                               | CP018924.1 | <a href="https://www.ncbi.nlm.nih.gov/nuccore/CP018924.1/">https://www.ncbi.nlm.nih.gov/nuccore/CP018924.1/</a> |
| 48 | <i>Serratia marcescens</i> strain FDAARGOS_65 chromosome, complete genome                                        | CP026050.1 | <a href="https://www.ncbi.nlm.nih.gov/nuccore/CP026050.1/">https://www.ncbi.nlm.nih.gov/nuccore/CP026050.1/</a> |
| 49 | <i>Serratia marcescens</i> strain FDAARGOS_659 chromosome                                                        | CP050960.1 | <a href="https://www.ncbi.nlm.nih.gov/nuccore/CP050960.1/">https://www.ncbi.nlm.nih.gov/nuccore/CP050960.1/</a> |
| 50 | <i>Serratia marcescens</i> strain FY chromosome, complete genome                                                 | CP053378.1 | <a href="https://www.ncbi.nlm.nih.gov/nuccore/CP053378.1/">https://www.ncbi.nlm.nih.gov/nuccore/CP053378.1/</a> |
| 51 | <i>Serratia marcescens</i> strain FZSF02 chromosome, complete genome                                             | CP053286.1 | <a href="https://www.ncbi.nlm.nih.gov/nuccore/CP053286.1/">https://www.ncbi.nlm.nih.gov/nuccore/CP053286.1/</a> |
| 52 | <i>Serratia marcescens</i> strain ICU-2 chromosome                                                               | CP059038.1 | <a href="https://www.ncbi.nlm.nih.gov/nuccore/CP059038.1/">https://www.ncbi.nlm.nih.gov/nuccore/CP059038.1/</a> |
| 53 | <i>Serratia marcescens</i> strain ICU-3 chromosome                                                               | CP059037.1 | <a href="https://www.ncbi.nlm.nih.gov/nuccore/CP059037.1/">https://www.ncbi.nlm.nih.gov/nuccore/CP059037.1/</a> |
| 54 | <i>Serratia marcescens</i> strain ICU-4 chromosome                                                               | CP059036.1 | <a href="https://www.ncbi.nlm.nih.gov/nuccore/CP059036.1/">https://www.ncbi.nlm.nih.gov/nuccore/CP059036.1/</a> |
| 55 | <i>Serratia marcescens</i> strain JW-CZ2 chromosome, complete genome                                             | CP055161.1 | <a href="https://www.ncbi.nlm.nih.gov/nuccore/CP055161.1/">https://www.ncbi.nlm.nih.gov/nuccore/CP055161.1/</a> |
| 56 | <i>Serratia marcescens</i> strain KS10 chromosome                                                                | CP027798.1 | <a href="https://www.ncbi.nlm.nih.gov/nuccore/CP027798.1/">https://www.ncbi.nlm.nih.gov/nuccore/CP027798.1/</a> |
| 57 | <i>Serratia marcescens</i> strain LVF3 chromosome, complete genome                                               | CP063229.1 | <a href="https://www.ncbi.nlm.nih.gov/nuccore/CP063229.1/">https://www.ncbi.nlm.nih.gov/nuccore/CP063229.1/</a> |
| 58 | <i>Serratia marcescens</i> strain WVU-002 chromosome, complete genome                                            | CP041123.1 | <a href="https://www.ncbi.nlm.nih.gov/nuccore/CP041123.1/">https://www.ncbi.nlm.nih.gov/nuccore/CP041123.1/</a> |
| 59 | <i>Serratia marcescens</i> strain WVU-004 chromosome, complete genome                                            | CP041125.1 | <a href="https://www.ncbi.nlm.nih.gov/nuccore/CP041125.1/">https://www.ncbi.nlm.nih.gov/nuccore/CP041125.1/</a> |
| 60 | <i>Serratia marcescens</i> strain WVU-007 chromosome, complete genome                                            | CP041130.1 | <a href="https://www.ncbi.nlm.nih.gov/nuccore/CP041130.1/">https://www.ncbi.nlm.nih.gov/nuccore/CP041130.1/</a> |
| 61 | <i>Serratia marcescens</i> strain WVU-008 chromosome, complete genome                                            | CP041131.1 | <a href="https://www.ncbi.nlm.nih.gov/nuccore/CP041131.1/">https://www.ncbi.nlm.nih.gov/nuccore/CP041131.1/</a> |
| 62 | <i>Serratia marcescens</i> strain WVU-009 chromosome, complete genome                                            | CP041132.1 | <a href="https://www.ncbi.nlm.nih.gov/nuccore/CP041132.1/">https://www.ncbi.nlm.nih.gov/nuccore/CP041132.1/</a> |
| 63 | <i>Serratia marcescens</i> strain WVU-010 chromosome, complete genome                                            | CP041134.1 | <a href="https://www.ncbi.nlm.nih.gov/nuccore/CP041134.1/">https://www.ncbi.nlm.nih.gov/nuccore/CP041134.1/</a> |

|    |                                                                                                                   |            |                                                                                                               |
|----|-------------------------------------------------------------------------------------------------------------------|------------|---------------------------------------------------------------------------------------------------------------|
| 64 | <i>Serratia marcescens</i> strain YHYF1 chromosome, complete genome                                               | CP092184.1 | <a href="https://www.ncbi.nlm.nih.gov/nuccore/CP092184.1">https://www.ncbi.nlm.nih.gov/nuccore/CP092184.1</a> |
| 65 | <i>Serratia marcescens</i> subsp. <i>marcescens</i> ATCC 13880 chromosome, complete genome                        | CP072199.1 | <a href="https://www.ncbi.nlm.nih.gov/nuccore/CP072199.1">https://www.ncbi.nlm.nih.gov/nuccore/CP072199.1</a> |
| 66 | <i>Serratia marcescens</i> subsp. <i>marcescens</i> ATCC 13880 chromosome, complete genome                        | CP041233.1 | <a href="https://www.ncbi.nlm.nih.gov/nuccore/CP041233.1">https://www.ncbi.nlm.nih.gov/nuccore/CP041233.1</a> |
| 67 | <i>Serratia marcescens</i> subsp. <i>marcescens</i> ATCC 13880 substr. Sm_S13_jyu2015 chromosome, complete genome | CP071236.1 | <a href="https://www.ncbi.nlm.nih.gov/nuccore/CP071236.1">https://www.ncbi.nlm.nih.gov/nuccore/CP071236.1</a> |
| 68 | <i>Serratia marcescens</i> subsp. <i>marcescens</i> ATCC 13880 substr. Sm_S22_jyu2015 chromosome, complete genome | CP071226.1 | <a href="https://www.ncbi.nlm.nih.gov/nuccore/CP071226.1">https://www.ncbi.nlm.nih.gov/nuccore/CP071226.1</a> |
| 69 | <i>Serratia marcescens</i> subsp. <i>marcescens</i> ATCC 13880 substr. Sm_S24_jyu2015 chromosome, complete genome | CP071216.1 | <a href="https://www.ncbi.nlm.nih.gov/nuccore/CP071216.1">https://www.ncbi.nlm.nih.gov/nuccore/CP071216.1</a> |
| 70 | <i>Serratia marcescens</i> subsp. <i>marcescens</i> ATCC 13880 substr. Sm_S28_jyu2015 chromosome, complete genome | CP071222.1 | <a href="https://www.ncbi.nlm.nih.gov/nuccore/CP071222.1">https://www.ncbi.nlm.nih.gov/nuccore/CP071222.1</a> |
| 71 | <i>Serratia marcescens</i> subsp. <i>marcescens</i> ATCC 13880 substr. Sm_S33_jyu2015 chromosome, complete genome | CP071224.1 | <a href="https://www.ncbi.nlm.nih.gov/nuccore/CP071224.1">https://www.ncbi.nlm.nih.gov/nuccore/CP071224.1</a> |
| 72 | <i>Serratia marcescens</i> subsp. <i>marcescens</i> ATCC 13880 substr. Sm_S37_jyu2015 chromosome, complete genome | CP071244.1 | <a href="https://www.ncbi.nlm.nih.gov/nuccore/CP071244.1">https://www.ncbi.nlm.nih.gov/nuccore/CP071244.1</a> |
| 73 | <i>Serratia marcescens</i> subsp. <i>marcescens</i> ATCC 13880 substr. Sm_S57_jyu2015 chromosome, complete genome | CP071220.1 | <a href="https://www.ncbi.nlm.nih.gov/nuccore/CP071220.1">https://www.ncbi.nlm.nih.gov/nuccore/CP071220.1</a> |
| 74 | <i>Serratia marcescens</i> subsp. <i>marcescens</i> ATCC 13880 substr. Sm_S60_jyu2015 chromosome, complete genome | CP071192.1 | <a href="https://www.ncbi.nlm.nih.gov/nuccore/CP071192.1">https://www.ncbi.nlm.nih.gov/nuccore/CP071192.1</a> |
| 75 | <i>Serratia marcescens</i> subsp. <i>marcescens</i> ATCC 13880 substr. Sm_S64_jyu2015 chromosome, complete genome | CP071240.1 | <a href="https://www.ncbi.nlm.nih.gov/nuccore/CP071240.1">https://www.ncbi.nlm.nih.gov/nuccore/CP071240.1</a> |
| 76 | <i>Serratia marcescens</i> subsp. <i>marcescens</i> ATCC 13880 substr. Sm_S65_jyu2015 chromosome, complete genome | CP071218.1 | <a href="https://www.ncbi.nlm.nih.gov/nuccore/CP071218.1">https://www.ncbi.nlm.nih.gov/nuccore/CP071218.1</a> |
| 77 | <i>Serratia marcescens</i> subsp. <i>marcescens</i> ATCC 13880 substr. Sm_S67_jyu2015 chromosome, complete genome | CP071232.1 | <a href="https://www.ncbi.nlm.nih.gov/nuccore/CP071232.1">https://www.ncbi.nlm.nih.gov/nuccore/CP071232.1</a> |
| 78 | <i>Serratia marcescens</i> strain BP2 chromosome, complete genome                                                 | CP050013.1 | <a href="https://www.ncbi.nlm.nih.gov/nuccore/CP050013.1">https://www.ncbi.nlm.nih.gov/nuccore/CP050013.1</a> |
| 79 | <i>Serratia marcescens</i> strain BWH-23 chromosome, complete genome                                              | CP020501.1 | <a href="https://www.ncbi.nlm.nih.gov/nuccore/CP020501.1">https://www.ncbi.nlm.nih.gov/nuccore/CP020501.1</a> |
| 80 | <i>Serratia marcescens</i> strain BWH-35 chromosome, complete genome                                              | CP020507.1 | <a href="https://www.ncbi.nlm.nih.gov/nuccore/CP020507.1">https://www.ncbi.nlm.nih.gov/nuccore/CP020507.1</a> |
| 81 | <i>Serratia marcescens</i> strain Byron chromosome, complete genome                                               | CP054277.1 | <a href="https://www.ncbi.nlm.nih.gov/nuccore/CP054277.1">https://www.ncbi.nlm.nih.gov/nuccore/CP054277.1</a> |
| 82 | <i>Serratia marcescens</i> strain C110 chromosome, complete genome                                                | CP047691.1 | <a href="https://www.ncbi.nlm.nih.gov/nuccore/CP047691.1">https://www.ncbi.nlm.nih.gov/nuccore/CP047691.1</a> |
| 83 | <i>Serratia marcescens</i> strain CM2012_028 chromosome, complete genome                                          | CP091122.1 | <a href="https://www.ncbi.nlm.nih.gov/nuccore/CP091122.1">https://www.ncbi.nlm.nih.gov/nuccore/CP091122.1</a> |
| 84 | <i>Serratia marcescens</i> strain E28 chromosome, complete genome                                                 | CP042512.1 | <a href="https://www.ncbi.nlm.nih.gov/nuccore/CP042512.1">https://www.ncbi.nlm.nih.gov/nuccore/CP042512.1</a> |
| 85 | <i>Serratia marcescens</i> strain EL1 chromosome                                                                  | CP027796.1 | <a href="https://www.ncbi.nlm.nih.gov/nuccore/CP027796.1">https://www.ncbi.nlm.nih.gov/nuccore/CP027796.1</a> |
| 86 | <i>Serratia marcescens</i> strain ESE2014 chromosome, complete genome                                             | CP058353.1 | <a href="https://www.ncbi.nlm.nih.gov/nuccore/CP058353.1">https://www.ncbi.nlm.nih.gov/nuccore/CP058353.1</a> |
| 87 | <i>Serratia marcescens</i> strain SJC1058 genome assembly, chromosome: 1                                          | OX291724.1 | <a href="https://www.ncbi.nlm.nih.gov/nuccore/OX291724.1">https://www.ncbi.nlm.nih.gov/nuccore/OX291724.1</a> |
| 88 | <i>Serratia marcescens</i> strain SJC1061 genome assembly, chromosome: 1                                          | OX291610.1 | <a href="https://www.ncbi.nlm.nih.gov/nuccore/OX291610.1">https://www.ncbi.nlm.nih.gov/nuccore/OX291610.1</a> |

|     |                                                                                                                   |            |                                                                                                               |
|-----|-------------------------------------------------------------------------------------------------------------------|------------|---------------------------------------------------------------------------------------------------------------|
| 89  | <i>Serratia marcescens</i> strain SJC1062 genome assembly, chromosome: 1                                          | OX291474.1 | <a href="https://www.ncbi.nlm.nih.gov/nuccore/OX291474.1">https://www.ncbi.nlm.nih.gov/nuccore/OX291474.1</a> |
| 90  | <i>Serratia marcescens</i> strain SJC1070 genome assembly, chromosome: 1                                          | OX291687.1 | <a href="https://www.ncbi.nlm.nih.gov/nuccore/OX291687.1">https://www.ncbi.nlm.nih.gov/nuccore/OX291687.1</a> |
| 91  | <i>Serratia marcescens</i> strain SJC1039 genome assembly, chromosome: 1                                          | OX291654.1 | <a href="https://www.ncbi.nlm.nih.gov/nuccore/OX291654.1">https://www.ncbi.nlm.nih.gov/nuccore/OX291654.1</a> |
| 92  | <i>Serratia marcescens</i> strain SJC1043 genome assembly, chromosome: 1                                          | OX291536.1 | <a href="https://www.ncbi.nlm.nih.gov/nuccore/OX291536.1">https://www.ncbi.nlm.nih.gov/nuccore/OX291536.1</a> |
| 93  | <i>Serratia marcescens</i> strain SJC1044 genome assembly, chromosome: 1                                          | OX291771.1 | <a href="https://www.ncbi.nlm.nih.gov/nuccore/OX291771.1">https://www.ncbi.nlm.nih.gov/nuccore/OX291771.1</a> |
| 94  | <i>Serratia marcescens</i> strain SJC1045 genome assembly, chromosome: 1                                          | OX291470.1 | <a href="https://www.ncbi.nlm.nih.gov/nuccore/OX291470.1">https://www.ncbi.nlm.nih.gov/nuccore/OX291470.1</a> |
| 95  | <i>Serratia marcescens</i> strain SJC1046 genome assembly, chromosome: 1                                          | OX291532.1 | <a href="https://www.ncbi.nlm.nih.gov/nuccore/OX291532.1">https://www.ncbi.nlm.nih.gov/nuccore/OX291532.1</a> |
| 96  | <i>Serratia marcescens</i> subsp. <i>marcescens</i> ATCC 13880 substr. Sm_S68_jyu2015 chromosome, complete genome | CP071198.1 | <a href="https://www.ncbi.nlm.nih.gov/nuccore/CP071198.1">https://www.ncbi.nlm.nih.gov/nuccore/CP071198.1</a> |
| 97  | <i>Serratia marcescens</i> subsp. <i>marcescens</i> ATCC 13880 substr. Sm_S6_jyu2015 chromosome, complete genome  | CP071204.1 | <a href="https://www.ncbi.nlm.nih.gov/nuccore/CP071204.1">https://www.ncbi.nlm.nih.gov/nuccore/CP071204.1</a> |
| 98  | <i>Serratia marcescens</i> subsp. <i>marcescens</i> ATCC 13880 substr. Sm_S71_jyu2015 chromosome, complete genome | CP071206.1 | <a href="https://www.ncbi.nlm.nih.gov/nuccore/CP071206.1">https://www.ncbi.nlm.nih.gov/nuccore/CP071206.1</a> |
| 99  | <i>Serratia marcescens</i> subsp. <i>marcescens</i> ATCC 13880 substr. Sm_S78_jyu2015 chromosome, complete genome | CP071228.1 | <a href="https://www.ncbi.nlm.nih.gov/nuccore/CP071228.1">https://www.ncbi.nlm.nih.gov/nuccore/CP071228.1</a> |
| 100 | <i>Serratia marcescens</i> subsp. <i>marcescens</i> ATCC 13880 substr. Sm_S79_jyu2015 chromosome, complete genome | CP071190.1 | <a href="https://www.ncbi.nlm.nih.gov/nuccore/CP071190.1">https://www.ncbi.nlm.nih.gov/nuccore/CP071190.1</a> |
| 101 | <i>Serratia marcescens</i> subsp. <i>marcescens</i> ATCC 13880 substr. Sm_S81_jyu2015 chromosome, complete genome | CP071208.1 | <a href="https://www.ncbi.nlm.nih.gov/nuccore/CP071208.1">https://www.ncbi.nlm.nih.gov/nuccore/CP071208.1</a> |
| 102 | <i>Serratia marcescens</i> subsp. <i>marcescens</i> ATCC 13880 substr. Sm_S89_jyu2015 chromosome, complete genome | CP071210.1 | <a href="https://www.ncbi.nlm.nih.gov/nuccore/CP071210.1">https://www.ncbi.nlm.nih.gov/nuccore/CP071210.1</a> |
| 103 | <i>Serratia marcescens</i> subsp. <i>marcescens</i> ATCC 13880 substr. Sm_S94_jyu2015 chromosome, complete genome | CP071188.1 | <a href="https://www.ncbi.nlm.nih.gov/nuccore/CP071188.1">https://www.ncbi.nlm.nih.gov/nuccore/CP071188.1</a> |
| 104 | <i>Serratia marcescens</i> subsp. <i>marcescens</i> ATCC 13880 substr. Sm_S95_jyu2015 chromosome, complete genome | CP071234.1 | <a href="https://www.ncbi.nlm.nih.gov/nuccore/CP071234.1">https://www.ncbi.nlm.nih.gov/nuccore/CP071234.1</a> |
| 105 | <i>Serratia marcescens</i> subsp. <i>marcescens</i> ATCC 13880 substr. Sm_S96_jyu2015 chromosome, complete genome | CP071200.1 | <a href="https://www.ncbi.nlm.nih.gov/nuccore/CP071200.1">https://www.ncbi.nlm.nih.gov/nuccore/CP071200.1</a> |
| 106 | <i>Serratia marcescens</i> strain SCH909 chromosome, complete genome                                              | CP063238.1 | <a href="https://www.ncbi.nlm.nih.gov/nuccore/CP063238.1">https://www.ncbi.nlm.nih.gov/nuccore/CP063238.1</a> |
| 107 | <i>Serratia marcescens</i> strain SCQ1 chromosome, complete genome                                                | CP063354.1 | <a href="https://www.ncbi.nlm.nih.gov/nuccore/CP063354.1">https://www.ncbi.nlm.nih.gov/nuccore/CP063354.1</a> |
| 108 | <i>Serratia marcescens</i> strain SGAir0764 chromosome, complete genome                                           | CP027300.1 | <a href="https://www.ncbi.nlm.nih.gov/nuccore/CP027300.1">https://www.ncbi.nlm.nih.gov/nuccore/CP027300.1</a> |
| 109 | <i>Serratia marcescens</i> strain SMBC50 chromosome, complete genome                                              | CP109829.1 | <a href="https://www.ncbi.nlm.nih.gov/nuccore/CP109829.1">https://www.ncbi.nlm.nih.gov/nuccore/CP109829.1</a> |
| 110 | <i>Serratia marcescens</i> strain SMNSF-1 chromosome, complete genome                                             | CP090244.1 | <a href="https://www.ncbi.nlm.nih.gov/nuccore/CP090244.1">https://www.ncbi.nlm.nih.gov/nuccore/CP090244.1</a> |
| 111 | <i>Serratia marcescens</i> strain SmUNAM836 chromosome, complete sequence                                         | CP012685.1 | <a href="https://www.ncbi.nlm.nih.gov/nuccore/CP012685.1">https://www.ncbi.nlm.nih.gov/nuccore/CP012685.1</a> |
| 112 | <i>Serratia marcescens</i> strain Sys06 chromosome, complete genome                                               | CP090908.1 | <a href="https://www.ncbi.nlm.nih.gov/nuccore/CP090908.1">https://www.ncbi.nlm.nih.gov/nuccore/CP090908.1</a> |
| 113 | <i>Serratia marcescens</i> strain U36365 chromosome, complete genome                                              | CP016032.1 | <a href="https://www.ncbi.nlm.nih.gov/nuccore/CP016032.1">https://www.ncbi.nlm.nih.gov/nuccore/CP016032.1</a> |
| 114 | <i>Serratia marcescens</i> 2020-O-9 DNA, complete genome                                                          | AP024847.1 | <a href="https://www.ncbi.nlm.nih.gov/nuccore/AP024847.1">https://www.ncbi.nlm.nih.gov/nuccore/AP024847.1</a> |

|     |                                                                                               |            |                                                                                                               |
|-----|-----------------------------------------------------------------------------------------------|------------|---------------------------------------------------------------------------------------------------------------|
| 115 | <i>Serratia marcescens</i> AS-1 DNA, complete genome                                          | AP019009.1 | <a href="https://www.ncbi.nlm.nih.gov/nuccore/AP019009.1">https://www.ncbi.nlm.nih.gov/nuccore/AP019009.1</a> |
| 116 | <i>Serratia marcescens</i> ATCC 274 DNA, complete genome                                      | AP021873.1 | <a href="https://www.ncbi.nlm.nih.gov/nuccore/AP021873.1">https://www.ncbi.nlm.nih.gov/nuccore/AP021873.1</a> |
| 117 | <i>Serratia marcescens</i> isolate GN26 chromosome                                            | CP026650.1 | <a href="https://www.ncbi.nlm.nih.gov/nuccore/CP026650.1">https://www.ncbi.nlm.nih.gov/nuccore/CP026650.1</a> |
| 118 | <i>Serratia marcescens</i> isolate PWN146_assembly genome assembly, chromosome:<br>Chromosome | LT575490.1 | <a href="https://www.ncbi.nlm.nih.gov/nuccore/LT575490.1">https://www.ncbi.nlm.nih.gov/nuccore/LT575490.1</a> |
| 119 | <i>Serratia marcescens</i> SM39 DNA, complete genome                                          | AP013063.1 | <a href="https://www.ncbi.nlm.nih.gov/nuccore/AP013063.1">https://www.ncbi.nlm.nih.gov/nuccore/AP013063.1</a> |
| 120 | <i>Serratia marcescens</i> SMB2099 complete genome                                            | HG738868.1 | <a href="https://www.ncbi.nlm.nih.gov/nuccore/HG738868.1">https://www.ncbi.nlm.nih.gov/nuccore/HG738868.1</a> |
| 121 | <i>Serratia marcescens</i> strain 11/2010 chromosome, complete genome                         | CP053927.1 | <a href="https://www.ncbi.nlm.nih.gov/nuccore/CP053927.1">https://www.ncbi.nlm.nih.gov/nuccore/CP053927.1</a> |
| 122 | <i>Serratia marcescens</i> strain 1140- chromosome, complete genome                           | CP047688.1 | <a href="https://www.ncbi.nlm.nih.gov/nuccore/CP047688.1">https://www.ncbi.nlm.nih.gov/nuccore/CP047688.1</a> |

## **Annexure – VIII**

**Comprehensive comparative analysis of PG producing BGCs in 122 *Serratia* species belonging to three different categories**

| Type                                                                      | Location  |           | Bioactive compound      | Most Known cluster | similarity |
|---------------------------------------------------------------------------|-----------|-----------|-------------------------|--------------------|------------|
|                                                                           | From      | To        |                         |                    |            |
| <i>Serratia marcescens</i> strain M158-1-1 chromosome, complete genome    |           |           |                         |                    |            |
| NRPS                                                                      | 1,768,922 | 1,815,529 | pyrronazol B            | NRP + Polyketide   | 9%         |
| RRE-containing                                                            | 1,849,816 | 1,870,094 | lankacidin C            | NRP + Polyketide   | 13%        |
| NRPS                                                                      | 1,946,631 | 1,994,234 | microcin H47            | RiPP:Microcin      | 20%        |
| thiopeptide                                                               | 2,571,915 | 2,598,359 | O-antigen               | Saccharide         | 14%        |
| betalactone                                                               | 3,600,139 | 3,625,807 | -                       | -                  | -          |
| hserlactone                                                               | 3,802,810 | 3,823,454 | -                       | -                  | -          |
| NRPS                                                                      | 3,959,473 | 4,043,669 | vulnibactin             | NRP                | 18%        |
| NRPS                                                                      | 4,812,080 | 4,856,018 | R1128                   | Polyketide         | 14%        |
| <i>Serratia marcescens</i> strain MGH246 chromosome                       |           |           |                         |                    |            |
| thiopeptide                                                               | 255,818   | 282,261   | O-antigen               | Saccharide         | 14%        |
| RRE-containing                                                            | 992,988   | 1,013,266 | lankacidin C            | NRP + Polyketide   | 13%        |
| NRPS                                                                      | 1,033,752 | 1,081,677 | pyrronazol B            | NRP + Polyketide   | 9%         |
| NRPS                                                                      | 1,719,642 | 1,805,531 | -                       | -                  | -          |
| siderophore                                                               | 2,998,995 | 3,010,854 | -                       | -                  | -          |
| NRPS                                                                      | 3,198,021 | 3,271,448 | xenotetrapeptide        | NRP                | 100%       |
| NRPS                                                                      | 4,045,919 | 4,105,114 | vulnibactin             | NRP                | 18%        |
| NRPS-like,hserlactone                                                     | 4,238,536 | 4,289,518 | -                       | -                  | -          |
| betalactone                                                               | 4,483,768 | 4,509,437 | -                       | -                  | -          |
| NRPS,T1PKS                                                                | 4,912,950 | 4,969,288 | olimycin A / olimycin B | Polyketide         | 5%         |
| <i>Serratia marcescens</i> strain MV-u1-SK1-O chromosome, complete genome |           |           |                         |                    |            |
| NRPS                                                                      | 301,925   | 360,320   | vulnibactin             | NRP                | 18%        |
| NRPS-like,hserlactone                                                     | 484,411   | 536,204   | -                       | -                  | -          |
| betalactone                                                               | 744,225   | 769,893   | -                       | -                  | -          |
| thiopeptide                                                               | 1,723,598 | 1,750,041 | O-antigen               | Saccharide         | 14%        |
| NRPS                                                                      | 2,318,574 | 2,365,587 | microcin H47            | RiPP:Microcin      | 20%        |
| RRE-containing                                                            | 2,452,198 | 2,472,476 | lankacidin C            | NRP + Polyketide   | 13%        |
| NRPS                                                                      | 2,488,797 | 2,534,905 | pyrronazol B            | NRP + Polyketide   | 9%         |

|                                                                      |                  |                  |                                            |                   |             |
|----------------------------------------------------------------------|------------------|------------------|--------------------------------------------|-------------------|-------------|
| T1PKS,NRPS                                                           | 3,147,495        | 3,209,493        | althiomycin                                | NRP               | 100%        |
| NRPS                                                                 | 4,612,536        | 4,670,316        | rhizomide A / rhizomide B<br>/ rhizomide C | NRP               | 100%        |
| <i>Serratia marcescens</i> strain N10A28 chromosome, complete genome |                  |                  |                                            |                   |             |
| betalactone                                                          | 61,318           | 86,987           | -                                          | -                 | -           |
| NRPS,T1PKS                                                           | 540,336          | 595,959          | olimycin A / olimycin B                    | Polyketide        | 5%          |
| thiopeptide                                                          | 1,159,811        | 1,186,254        | O-antigen                                  | Saccharide        | 14%         |
| RRE-containing                                                       | 1,897,121        | 1,917,399        | lankacidin C                               | NRP + Polyketide  | 13%         |
| NRPS                                                                 | 1,939,073        | 1,986,863        | pyrronazol B                               | NRP + Polyketide  | 9%          |
| NRPS                                                                 | 2,613,416        | 2,699,302        | -                                          | -                 | -           |
| siderophore                                                          | 3,879,359        | 3,891,218        | -                                          | -                 | -           |
| NRPS                                                                 | 4,078,386        | 4,135,283        | xenotetrapeptide                           | NRP               | 100%        |
| NRPS                                                                 | 4,906,759        | 4,966,587        | turnerbactin                               | NRP               | 30%         |
| NRPS-like                                                            | 5,094,203        | 5,137,166        | -                                          | -                 | -           |
| <i>Serratia marcescens</i> strain N4-5 chromosome, complete genome   |                  |                  |                                            |                   |             |
| NRPS-like,hserlactone                                                | 464,549          | 515,758          | -                                          | -                 | -           |
| betalactone                                                          | 718,310          | 743,980          | -                                          | -                 | -           |
| <b>prodigiosin</b>                                                   | <b>1,096,070</b> | <b>1,131,090</b> | <b>prodigiosin</b>                         | <b>Polyketide</b> | <b>100%</b> |
| thiopeptide                                                          | 1,709,166        | 1,735,610        | O-antigen                                  | Saccharide        | 14%         |
| NRPS                                                                 | 2,327,560        | 2,372,840        | microcin H47                               | RiPP:Microcin     | 20%         |
| redox-cofactor                                                       | 2,461,838        | 2,484,000        | lankacidin C                               | NRP + Polyketide  | 13%         |
| NRPS                                                                 | 2,511,923        | 2,559,392        | pyrronazol B                               | NRP + Polyketide  | 9%          |
| NRPS                                                                 | 4,524,652        | 4,568,587        | xantholipin                                | Polyketide        | 4%          |
| <i>Serratia marcescens</i> strain RH10 chromosome, complete genome   |                  |                  |                                            |                   |             |
| NRPS                                                                 | 315,410          | 357,890          | enterobactin                               | NRP               | 12%         |
| NRPS-like                                                            | 480,852          | 523,292          | -                                          | -                 | -           |
| betalactone                                                          | 739,899          | 765,566          | -                                          | -                 | -           |
| thiopeptide                                                          | 1,706,630        | 1,733,074        | O-antigen                                  | Saccharide        | 14%         |
| NRPS                                                                 | 2,368,316        | 2,415,325        | microcin H47                               | RiPP:Microcin     | 20%         |
| redox-cofactor                                                       | 2,493,929        | 2,516,091        | lankacidin C                               | NRP + Polyketide  | 13%         |



|                                                                       |                  |                  |                                            |                   |             |
|-----------------------------------------------------------------------|------------------|------------------|--------------------------------------------|-------------------|-------------|
| NRPS                                                                  | 2,545,383        | 2,593,893        | pyrronazol B                               | NRP + Polyketide  | 9%          |
| <i>Serratia marcescens</i> strain RSC-14, complete genome             |                  |                  |                                            |                   |             |
| thiopeptide                                                           | 321,461          | 347,209          | -                                          | -                 | -           |
| NRPS                                                                  | 937,262          | 982,472          | -                                          | -                 | -           |
| betalactone                                                           | 1,352,119        | 1,377,787        | -                                          | -                 | -           |
| NRPS                                                                  | 1,744,602        | 1,803,283        | vulnibactin                                | NRP               | 12%         |
| hserlactone                                                           | 2,035,550        | 2,056,224        | -                                          | -                 | -           |
| NRPS                                                                  | 2,578,081        | 2,634,840        | rhizomide A / rhizomide B<br>/ rhizomide C | NRP               | 100%        |
| thiopeptide,LAP                                                       | 3,389,285        | 3,418,062        | -                                          | -                 | -           |
| NRPS                                                                  | 3,926,126        | 4,011,902        | -                                          | -                 | -           |
| NRPS                                                                  | 4,632,414        | 4,680,924        | pyrronazol B                               | NRP + Polyketide  | 9%          |
| RRE-containing                                                        | 4,712,243        | 4,732,521        | lankacidin C                               | NRP + Polyketide  | 13%         |
| <i>Serratia marcescens</i> strain S2I7 genome                         |                  |                  |                                            |                   |             |
| NRPS                                                                  | 329,927          | 384,346          | vulnibactin                                | NRP               | 18%         |
| betalactone                                                           | 807,967          | 833,637          | -                                          | -                 | -           |
| redox-cofactor                                                        | 1,030,071        | 1,051,482        | lankacidin C                               | NRP + Polyketide  | 13%         |
| <b>prodigiosin</b>                                                    | <b>1,204,774</b> | <b>1,239,794</b> | <b>prodigiosin</b>                         | <b>Polyketide</b> | <b>100%</b> |
| thiopeptide                                                           | 1,842,979        | 1,869,424        | O-antigen                                  | Saccharide        | 14%         |
| redox-cofactor                                                        | 2,595,048        | 2,617,210        | lankacidin C                               | NRP + Polyketide  | 13%         |
| NRPS                                                                  | 2,635,571        | 2,682,118        | pyrronazol B                               | NRP + Polyketide  | 9%          |
| NRPS                                                                  | 3,359,430        | 3,403,192        | -                                          | -                 | -           |
| NRPS                                                                  | 4,730,647        | 4,774,585        | xantholipin                                | Polyketide        | 4%          |
| <i>Serratia marcescens</i> strain SARVS06 chromosome, complete genome |                  |                  |                                            |                   |             |
| NRPS                                                                  | 74,291           | 115,597          | bicornutin A1 / bicornutin<br>A2           | NRP               | 100%        |
| NRPS                                                                  | 1,457,516        | 1,501,271        | -                                          | -                 | -           |
| NRPS                                                                  | 2,147,453        | 2,193,972        | pyrronazol B                               | NRP + Polyketide  | 9%          |
| RRE-containing                                                        | 2,216,040        | 2,233,241        | lankacidin C                               | NRP + Polyketide  | 13%         |
| thiopeptide                                                           | 2,987,192        | 3,013,636        | O-antigen                                  | Saccharide        | 14%         |
| <b>prodigiosin</b>                                                    | <b>3,605,836</b> | <b>3,640,856</b> | <b>prodigiosin</b>                         | <b>Polyketide</b> | <b>100%</b> |



|                                                                        |                  |                  |                               |                   |             |
|------------------------------------------------------------------------|------------------|------------------|-------------------------------|-------------------|-------------|
| redox-cofactor                                                         | 3,793,423        | 3,815,585        | lankacidin C                  | NRP + Polyketide  | 13%         |
| betalactone                                                            | 3,986,125        | 4,011,795        | -                             | -                 | -           |
| NRPS                                                                   | 4,417,714        | 4,460,809        | vulnibactin                   | NRP               | 12%         |
| <i>Serratia marcescens</i> strain SASK1000 chromosome, complete genome |                  |                  |                               |                   |             |
| NRPS                                                                   | 74,291           | 115,598          | bicornutin A1 / bicornutin A2 | NRP               | 100%        |
| NRPS                                                                   | 1,457,519        | 1,501,273        | -                             | -                 | -           |
| NRPS                                                                   | 2,147,454        | 2,193,971        | pyrronazol B                  | NRP + Polyketide  | 9%          |
| redox-cofactor                                                         | 2,213,833        | 2,234,891        | lankacidin C                  | NRP + Polyketide  | 13%         |
| thiopeptide                                                            | 2,987,190        | 3,013,634        | O-antigen                     | Saccharide        | 14%         |
| <b>prodigiosin</b>                                                     | <b>3,605,830</b> | <b>3,640,850</b> | <b>prodigiosin</b>            | <b>Polyketide</b> | <b>100%</b> |
| redox-cofactor                                                         | 3,793,416        | 3,815,578        | lankacidin C                  | NRP + Polyketide  | 13%         |
| betalactone                                                            | 3,986,116        | 4,011,786        | -                             | -                 | -           |
| NRPS                                                                   | 4,400,963        | 4,460,804        | vulnibactin                   | NRP               | 18%         |
| <i>Serratia marcescens</i> strain 12/2010 chromosome, complete genome  |                  |                  |                               |                   |             |
| NRPS                                                                   | 287,085          | 345,646          | vulnibactin                   | NRP               | 18%         |
| NRPS-like, hserlactone                                                 | 459,515          | 510,629          | -                             | -                 | -           |
| betalactone                                                            | 717,332          | 743,001          | -                             | -                 | -           |
| <b>NRPS</b>                                                            | <b>1,110,632</b> | <b>1,155,304</b> | <b>prodigiosin</b>            | <b>Polyketide</b> | <b>12%</b>  |
| thiopeptide                                                            | 1,747,804        | 1,774,245        | O-antigen                     | Saccharide        | 14%         |
| NRPS                                                                   | 2,119,200        | 2,172,276        | -                             | -                 | -           |
| RRE-containing                                                         | 2,585,999        | 2,606,277        | lankacidin C                  | NRP + Polyketide  | 13%         |
| NRPS                                                                   | 2,621,159        | 2,667,417        | -                             | -                 | -           |
| NRPS                                                                   | 3,485,251        | 3,534,269        | -                             | -                 | -           |
| NRPS                                                                   | 5,063,102        | 5,119,952        | xenotetrapeptide              | NRP               | 100%        |
| NRPS, T1PKS                                                            | 5,355,540        | 5,410,162        | -                             | -                 | -           |
| <i>Serratia marcescens</i> strain 1274 chromosome, partial genome      |                  |                  |                               |                   |             |
| thiopeptide                                                            | 736,176          | 762,618          | O-antigen                     | Saccharide        | 14%         |
| betalactone                                                            | 1,828,191        | 1,853,858        | -                             | -                 | -           |
| hserlactone                                                            | 2,042,741        | 2,063,433        | -                             | -                 | -           |

|                                                                        |                  |                  |                                            |                   |             |
|------------------------------------------------------------------------|------------------|------------------|--------------------------------------------|-------------------|-------------|
| NRPS                                                                   | 2,218,300        | 2,260,684        | turnerbactin                               | NRP               | 30%         |
| NRPS,NRPS-like                                                         | 3,998,394        | 4,052,053        | lysobactin                                 | NRP               | 2%          |
| siderophore                                                            | 4,239,977        | 4,251,836        | -                                          | -                 | -           |
| NRPS                                                                   | 4,310,601        | 4,396,437        | -                                          | -                 | -           |
| NRPS                                                                   | 5,026,004        | 5,074,514        | pyrronazol B                               | NRP + Polyketide  | 9%          |
| RRE-containing                                                         | 5,095,122        | 5,115,400        | lankacidin C                               | NRP + Polyketide  | 13%         |
| <i>Serratia marcescens</i> strain 1602 chromosome, complete genome     |                  |                  |                                            |                   |             |
| NRPS                                                                   | 270,830          | 329,366          | vulnibactin                                | NRP               | 18%         |
| NRPS-like,hserlactone                                                  | 444,964          | 497,080          | -                                          | -                 | -           |
| betalactone                                                            | 700,290          | 725,960          | -                                          | -                 | -           |
| <b>NRPS</b>                                                            | <b>1,089,090</b> | <b>1,133,764</b> | <b>prodigiosin</b>                         | <b>Polyketide</b> | <b>12%</b>  |
| thiopeptide                                                            | 1,733,034        | 1,759,475        | O-antigen                                  | Saccharide        | 14%         |
| NRPS                                                                   | 2,363,456        | 2,409,846        | colicin V                                  | RiPP              | 1%          |
| RRE-containing                                                         | 2,497,536        | 2,517,814        | lankacidin C                               | NRP + Polyketide  | 13%         |
| NRPS                                                                   | 2,539,518        | 2,586,327        | -                                          | -                 | -           |
| NRPS                                                                   | 3,222,740        | 3,271,248        | -                                          | -                 | -           |
| NRPS                                                                   | 4,539,011        | 4,594,551        | rhizomide A / rhizomide B<br>/ rhizomide C | NRP               | 100%        |
| NRPS,T1PKS                                                             | 4,829,806        | 4,884,428        | -                                          | -                 | -           |
| <i>Serratia marcescens</i> strain 1912768R chromosome, complete genome |                  |                  |                                            |                   |             |
| NRPS                                                                   | 1,219,713        | 1,263,481        | -                                          | -                 | -           |
| NRPS                                                                   | 1,955,399        | 2,001,998        | turnerbactin                               | NRP               | 15%         |
| redox-cofactor                                                         | 2,019,297        | 2,040,267        | lankacidin C                               | NRP + Polyketide  | 13%         |
| thiopeptide                                                            | 2,707,712        | 2,734,156        | O-antigen                                  | Saccharide        | 14%         |
| <b>prodigiosin</b>                                                     | <b>3,328,113</b> | <b>3,363,133</b> | <b>prodigiosin</b>                         | <b>Polyketide</b> | <b>100%</b> |
| redox-cofactor                                                         | 3,515,714        | 3,537,876        | lankacidin C                               | NRP + Polyketide  | 13%         |
| betalactone                                                            | 3,708,560        | 3,734,230        | -                                          | -                 | -           |
| NRPS                                                                   | 4,140,914        | 4,199,727        | vulnibactin                                | NRP               | 18%         |
| NRPS                                                                   | 4,997,021        | 5,040,959        | xantholipin                                | Polyketide        | 4%          |
| <i>Serratia marcescens</i> strain 2838 chromosome, complete genome     |                  |                  |                                            |                   |             |

|                                                                    |                  |                  |                                            |                               |            |
|--------------------------------------------------------------------|------------------|------------------|--------------------------------------------|-------------------------------|------------|
| NRPS                                                               | 292,397          | 350,100          | vulnibactin                                | NRP                           | 18%        |
| NRPS-like                                                          | 474,518          | 516,297          | -                                          | -                             | -          |
| betalactone                                                        | 772,671          | 798,340          | -                                          | -                             | -          |
| <b>NRPS</b>                                                        | <b>1,191,319</b> | <b>1,235,993</b> | <b>prodigiosin</b>                         | <b>Polyketide</b>             | <b>12%</b> |
| thiopeptide                                                        | 1,833,431        | 1,859,872        | O-antigen                                  | Saccharide                    | 14%        |
| NRPS                                                               | 2,547,860        | 2,594,559        | colicin V                                  | RiPP                          | 1%         |
| RRE-containing                                                     | 2,679,230        | 2,699,508        | lankacidin C                               | NRP + Polyketide              | 13%        |
| NRPS                                                               | 2,719,697        | 2,764,840        | pyrronazol B                               | NRP + Polyketide              | 9%         |
| NRPS                                                               | 3,407,003        | 3,456,553        | lipopolysaccharide                         | Saccharide:Lipopolysaccharide | 5%         |
| NRPS                                                               | 3,519,745        | 3,576,602        | gobichelin A / gobichelin B                | NRP                           | 11%        |
| RiPP-like                                                          | 3,918,291        | 3,930,837        | -                                          | -                             | -          |
| NRPS                                                               | 4,830,442        | 4,888,294        | rhizomide A / rhizomide B<br>/ rhizomide C | NRP                           | 100%       |
| <i>Serratia marcescens</i> strain 3024 chromosome, complete genome |                  |                  |                                            |                               |            |
| NRPS                                                               | 789,965          | 846,809          | rhizomide A / rhizomide B<br>/ rhizomide C | NRP                           | 100%       |
| RiPP-like                                                          | 1,746,396        | 1,758,942        | -                                          | -                             | -          |
| NRPS                                                               | 2,100,631        | 2,157,488        | gobichelin A / gobichelin B                | NRP                           | 11%        |
| NRPS                                                               | 2,220,680        | 2,270,230        | lipopolysaccharide                         | Saccharide:Lipopolysaccharide | 5%         |
| NRPS                                                               | 2,913,492        | 2,958,635        | pyrronazol B                               | NRP + Polyketide              | 9%         |
| RRE-containing                                                     | 2,978,824        | 2,999,102        | lankacidin C                               | NRP + Polyketide              | 13%        |
| NRPS                                                               | 3,083,773        | 3,130,472        | colicin V                                  | RiPP                          | 1%         |
| thiopeptide                                                        | 3,818,626        | 3,845,067        | O-antigen                                  | Saccharide                    | 14%        |
| <b>NRPS</b>                                                        | <b>4,442,505</b> | <b>4,487,179</b> | <b>prodigiosin</b>                         | <b>Polyketide</b>             | <b>12%</b> |
| betalactone                                                        | 4,880,157        | 4,905,826        | -                                          | -                             | -          |
| NRPS-like                                                          | 5,162,200        | 5,203,979        | -                                          | -                             | -          |
| NRPS                                                               | 5,326,799        | 5,386,622        | vulnibactin                                | NRP                           | 18%        |
| <i>Serratia marcescens</i> strain 332 chromosome, complete genome  |                  |                  |                                            |                               |            |
| NRPS                                                               | 281,130          | 339,279          | vulnibactin                                | NRP                           | 18%        |
| betalactone                                                        | 698,703          | 724,372          | -                                          | -                             | -          |
| thiopeptide                                                        | 1,685,588        | 1,712,031        | O-antigen                                  | Saccharide                    | 14%        |

|                                                                    |                  |                  |                                            |                   |            |
|--------------------------------------------------------------------|------------------|------------------|--------------------------------------------|-------------------|------------|
| RRE-containing                                                     | 2,356,430        | 2,376,708        | lankacidin C                               | NRP + Polyketide  | 13%        |
| NRPS                                                               | 2,410,990        | 2,457,623        | pyrronazol B                               | NRP + Polyketide  | 9%         |
| RiPP-like                                                          | 3,647,550        | 3,660,078        | -                                          | -                 | -          |
| NRPS                                                               | 4,521,966        | 4,565,904        | R1128                                      | Polyketide        | 14%        |
| <i>Serratia marcescens</i> strain 4201 chromosome, complete genome |                  |                  |                                            |                   |            |
| hserlactone                                                        | 23,319           | 43,993           | -                                          | -                 | -          |
| NRPS                                                               | 277,466          | 336,713          | vulnibactin                                | NRP               | 12%        |
| betalactone                                                        | 711,467          | 737,135          | -                                          | -                 | -          |
| <b>NRPS-like,NRPS</b>                                              | <b>1,126,560</b> | <b>1,171,227</b> | <b>prodigiosin</b>                         | <b>Polyketide</b> | <b>12%</b> |
| thiopeptide                                                        | 1,819,149        | 1,844,869        | O-antigen                                  | Saccharide        | 14%        |
| RRE-containing                                                     | 2,539,939        | 2,560,217        | lankacidin C                               | NRP + Polyketide  | 13%        |
| T1PKS,NRPS                                                         | 2,572,441        | 2,642,698        | pyrronazol B                               | NRP + Polyketide  | 9%         |
| NRPS                                                               | 3,284,769        | 3,370,545        | -                                          | -                 | -          |
| thiopeptide,LAP,NRPS                                               | 3,870,841        | 3,918,187        | microcin E492                              | RiPP:Microcin     | 12%        |
| NRPS                                                               | 4,774,975        | 4,832,821        | rhizomide A / rhizomide B<br>/ rhizomide C | NRP               | 100%       |
| <i>Serratia marcescens</i> strain 95 chromosome, complete genome   |                  |                  |                                            |                   |            |
| NRPS                                                               | 267,640          | 326,049          | turnerbactin                               | NRP               | 30%        |
| NRPS-like                                                          | 440,629          | 482,641          | -                                          | -                 | -          |
| betalactone                                                        | 686,207          | 711,877          | -                                          | -                 | -          |
| thiopeptide                                                        | 1,823,248        | 1,849,690        | O-antigen                                  | Saccharide        | 14%        |
| siderophore                                                        | 1,999,540        | 2,011,399        | -                                          | -                 | -          |
| redox-cofactor                                                     | 2,570,922        | 2,593,084        | lankacidin C                               | NRP + Polyketide  | 13%        |
| T1PKS,NRPS                                                         | 3,264,723        | 3,327,660        | althiomycin                                | NRP               | 100%       |
| NRPS                                                               | 3,455,571        | 3,500,770        | -                                          | -                 | -          |
| NRPS                                                               | 4,730,531        | 4,788,383        | rhizomide A / rhizomide B<br>/ rhizomide C | NRP               | 100%       |
| <i>Serratia marcescens</i> strain UMH3 chromosome, complete genome |                  |                  |                                            |                   |            |
| betalactone                                                        | 60,940           | 86,609           | -                                          | -                 | -          |
| <b>NRPS</b>                                                        | <b>428,720</b>   | <b>473,393</b>   | <b>prodigiosin</b>                         | <b>Polyketide</b> | <b>12%</b> |
| thiopeptide                                                        | 1,077,451        | 1,103,892        | O-antigen                                  | Saccharide        | 14%        |

|                                                                    |           |           |                                            |                  |      |
|--------------------------------------------------------------------|-----------|-----------|--------------------------------------------|------------------|------|
| NRPS                                                               | 1,735,352 | 1,782,064 | colicin V                                  | RiPP             | 1%   |
| RRE-containing                                                     | 1,865,618 | 1,885,896 | lankacidin C                               | NRP + Polyketide | 13%  |
| NRPS                                                               | 1,935,243 | 1,981,754 | turnerbactin                               | NRP              | 15%  |
| NRPS                                                               | 2,686,444 | 2,734,951 | -                                          | -                | -    |
| NRPS                                                               | 4,078,128 | 4,134,978 | rhizomide A / rhizomide B<br>/ rhizomide C | NRP              | 100% |
| NRPS,T1PKS                                                         | 4,357,877 | 4,412,036 | -                                          | -                | -    |
| NRPS                                                               | 4,918,550 | 4,978,379 | vulnibactin                                | NRP              | 18%  |
| NRPS-like,hsrlactone                                               | 5,092,894 | 5,144,974 |                                            |                  |      |
| <i>Serratia marcescens</i> strain UMH5 chromosome, complete genome |           |           |                                            |                  |      |
| betalactone                                                        | 60,796    | 86,465    | -                                          | -                | -    |
| thiopeptide                                                        | 1,153,113 | 1,179,556 | O-antigen                                  | Saccharide       | 14%  |
| RRE-containing                                                     | 1,883,518 | 1,903,796 | lankacidin C                               | NRP + Polyketide | 13%  |
| NRPS                                                               | 1,924,541 | 1,972,355 | pyrronazol B                               | NRP + Polyketide | 9%   |
| NRPS                                                               | 2,598,877 | 2,684,754 | -                                          | -                | -    |
| siderophore                                                        | 3,841,687 | 3,853,546 | -                                          | -                | -    |
| NRPS                                                               | 4,913,885 | 4,973,712 | vulnibactin                                | NRP              | 18%  |
| hsrlactone                                                         | 5,213,524 | 5,234,168 | -                                          | -                | -    |
| <i>Serratia marcescens</i> strain UMH6 chromosome, complete genome |           |           |                                            |                  |      |
| betalactone                                                        | 61,010    | 86,679    |                                            |                  |      |
| NRPS,T1PKS                                                         | 448,346   | 548,890   | olimycin A / olimycin B                    | Polyketide       | 5%   |
| thiopeptide                                                        | 1,098,383 | 1,124,825 | O-antigen                                  | Saccharide       | 14%  |
| RRE-containing                                                     | 1,868,800 | 1,889,078 | lankacidin C                               | NRP + Polyketide | 13%  |
| NRPS                                                               | 1,889,898 | 1,937,878 | turnerbactin                               | NRP              | 15%  |
| NRPS                                                               | 2,590,530 | 2,667,119 | ravidomycin                                | Polyketide       | 5%   |
| NRPS                                                               | 3,995,027 | 4,049,933 | rhizomide A / rhizomide B<br>/ rhizomide C | NRP              | 100% |
| NRPS                                                               | 4,234,941 | 4,277,402 | pseudomonine                               | NRP              | 20%  |
| hsrlactone                                                         | 4,502,685 | 4,523,359 | -                                          | -                | -    |
| NRPS                                                               | 4,840,443 | 4,884,387 | enterobactin                               | NRP              | 12%  |
| <i>Serratia marcescens</i> strain UMH7 chromosome, complete genome |           |           |                                            |                  |      |

|                                                                    |                |                |                                            |                   |             |
|--------------------------------------------------------------------|----------------|----------------|--------------------------------------------|-------------------|-------------|
| betalactone                                                        | 61,010         | 86,678         |                                            |                   |             |
| <b>NRPS</b>                                                        | <b>457,943</b> | <b>503,165</b> | <b>prodigiosin</b>                         | <b>Polyketide</b> | <b>12%</b>  |
| thiopeptide                                                        | 1,126,065      | 1,151,789      | O-antigen                                  | Saccharide        | 14%         |
| RRE-containing                                                     | 1,846,706      | 1,866,984      | lankacidin C                               | NRP + Polyketide  | 13%         |
| T1PKS,NRPS                                                         | 1,877,903      | 1,947,780      | pyrronazol B                               | NRP + Polyketide  | 9%          |
| NRPS                                                               | 2,560,316      | 2,636,614      | -                                          | -                 | -           |
| thiopeptide,LAP,NRPS                                               | 3,146,832      | 3,192,346      | microcin E492                              | RiPP:Microcin     | 12%         |
| NRPS                                                               | 3,987,938      | 4,044,684      | rhizomide A / rhizomide B<br>/ rhizomide C | NRP               | 100%        |
| hserlactone                                                        | 4,566,104      | 4,586,778      | -                                          | -                 | -           |
| NRPS                                                               | 4,819,283      | 4,879,273      | vulnibactin                                | NRP               | 12%         |
| <i>Serratia marcescens</i> strain UMH8 chromosome, complete genome |                |                |                                            |                   |             |
| betalactone                                                        | 61,029         | 86,698         | -                                          | -                 | -           |
| <b>prodigiosin</b>                                                 | <b>443,511</b> | <b>478,531</b> | <b>prodigiosin</b>                         | <b>Polyketide</b> | <b>100%</b> |
| thiopeptide                                                        | 1,057,373      | 1,083,817      | O-antigen                                  | Saccharide        | 14%         |
| NRPS                                                               | 1,665,800      | 1,712,675      | microcin H47                               | RiPP:Microcin     | 20%         |
| redox-cofactor                                                     | 1,789,938      | 1,812,100      | lankacidin C                               | NRP + Polyketide  | 13%         |
| NRPS                                                               | 1,837,358      | 1,883,756      | pyrronazol B                               | NRP + Polyketide  | 9%          |
| NRPS                                                               | 3,910,884      | 3,954,107      | xantholipin                                | Polyketide        | 4%          |
| NRPS                                                               | 4,762,634      | 4,822,454      | vulnibactin                                | NRP               | 12%         |
| NRPS-like                                                          | 4,944,552      | 4,987,530      | -                                          | -                 | -           |
| <i>Serratia marcescens</i> strain UMH9 chromosome, complete genome |                |                |                                            |                   |             |
| betalactone                                                        | 60,933         | 86,602         |                                            |                   |             |
| <b>NRPS</b>                                                        | <b>439,738</b> | <b>484,387</b> | <b>prodigiosin</b>                         | <b>Polyketide</b> | <b>12%</b>  |
| thiopeptide                                                        | 1,065,875      | 1,092,316      | O-antigen                                  | Saccharide        | 14%         |
| NRPS                                                               | 1,634,363      | 1,681,070      | colicin V                                  | RiPP              | 1%          |
| RRE-containing                                                     | 1,769,262      | 1,789,540      | lankacidin C                               | NRP + Polyketide  | 13%         |
| NRPS                                                               | 1,807,920      | 1,854,010      | pyrronazol B                               | NRP + Polyketide  | 9%          |
| NRPS                                                               | 2,478,653      | 2,527,576      | -                                          | -                 | -           |
| NRPS                                                               | 3,788,524      | 3,845,379      | xenotetrapeptide                           | NRP               | 100%        |

|                                                                          |           |           |                                            |                  |      |
|--------------------------------------------------------------------------|-----------|-----------|--------------------------------------------|------------------|------|
| NRPS,TIPKS                                                               | 4,068,151 | 4,121,045 | -                                          | -                | -    |
| NRPS                                                                     | 4,642,493 | 4,702,316 | vulnibactin                                | NRP              | 18%  |
| <i>Serratia marcescens</i> strain SJC1048 genome assembly, chromosome: 1 |           |           |                                            |                  |      |
| NRPS                                                                     | 291,794   | 351,526   | vulnibactin                                | NRP              | 12%  |
| NRPS-like                                                                | 475,241   | 517,428   | -                                          | -                | -    |
| RRE-containing                                                           | 524,603   | 539,264   | -                                          | -                | -    |
| betalactone                                                              | 745,983   | 771,652   | -                                          | -                | -    |
| thiopeptide                                                              | 1,842,573 | 1,869,016 | O-antigen                                  | Saccharide       | 14%  |
| siderophore                                                              | 2,054,663 | 2,066,522 | -                                          | -                | -    |
| redox-cofactor                                                           | 2,592,864 | 2,615,026 | lankacidin C                               | NRP + Polyketide | 13%  |
| TIPKS,NRPS                                                               | 3,248,078 | 3,311,145 | althiomycin                                | NRP              | 100% |
| NRPS                                                                     | 3,376,840 | 3,421,933 | -                                          | -                | -    |
| NRPS                                                                     | 3,487,193 | 3,533,250 | yersiniabactin                             | NRP + Polyketide | 4%   |
| NRPS                                                                     | 4,820,838 | 4,875,468 | rhizomide A / rhizomide B<br>/ rhizomide C | NRP              | 100% |
| <i>Serratia marcescens</i> strain SJC1050 genome assembly, chromosome: 1 |           |           |                                            |                  |      |
| TIPKS,NRPS                                                               | 1         | 44,123    | althiomycin                                | NRP              | 100% |
| NRPS                                                                     | 109,818   | 154,911   | -                                          | -                | -    |
| NRPS                                                                     | 220,171   | 266,228   | yersiniabactin                             | NRP + Polyketide | 4%   |
| NRPS                                                                     | 1,553,851 | 1,608,189 | rhizomide A / rhizomide B<br>/ rhizomide C | NRP              | 100% |
| NRPS                                                                     | 2,457,726 | 2,517,717 | vulnibactin                                | NRP              | 12%  |
| NRPS-like                                                                | 2,641,027 | 2,684,008 | -                                          | -                | -    |
| RRE-containing                                                           | 2,690,757 | 2,705,418 | -                                          | -                | -    |
| betalactone                                                              | 2,912,137 | 2,937,806 | -                                          | -                | -    |
| thiopeptide                                                              | 4,008,405 | 4,034,848 | O-antigen                                  | Saccharide       | 14%  |
| siderophore                                                              | 4,220,495 | 4,232,354 | -                                          | -                | -    |
| redox-cofactor                                                           | 4,758,697 | 4,780,859 | lankacidin C                               | NRP + Polyketide | 13%  |
| <i>Serratia marcescens</i> strain SJC1051 genome assembly, chromosome: 1 |           |           |                                            |                  |      |
| NRPS                                                                     | 291,793   | 351,524   | vulnibactin                                | NRP              | 12%  |
| NRPS-like                                                                | 475,239   | 517,426   | -                                          | -                | -    |

|                                                                          |           |           |                                            |                  |      |
|--------------------------------------------------------------------------|-----------|-----------|--------------------------------------------|------------------|------|
| RRE-containing                                                           | 524,601   | 539,262   | -                                          | -                | -    |
| betalactone                                                              | 745,981   | 771,650   | -                                          | -                | -    |
| thiopeptide                                                              | 995,870   | 1,022,313 | O-antigen                                  | Saccharide       | 14%  |
| siderophore                                                              | 2,054,373 | 2,066,232 | -                                          | -                | -    |
| redox-cofactor                                                           | 2,638,910 | 2,661,072 | lankacidin C                               | NRP + Polyketide | 13%  |
| T1PKS,NRPS                                                               | 3,294,136 | 3,357,203 | althiomycin                                | NRP              | 100% |
| NRPS                                                                     | 3,422,898 | 3,467,991 | -                                          | -                | -    |
| NRPS                                                                     | 3,533,251 | 3,579,308 | yersiniabactin                             | NRP + Polyketide | 4%   |
| NRPS                                                                     | 4,866,940 | 4,921,570 | rhizomide A / rhizomide B<br>/ rhizomide C | NRP              | 100% |
| <i>Serratia marcescens</i> strain SJC1052 genome assembly, chromosome: 1 |           |           |                                            |                  |      |
| thiopeptide                                                              | 249,683   | 276,126   | O-antigen                                  | Saccharide       | 14%  |
| siderophore                                                              | 461,773   | 473,632   | -                                          | -                | -    |
| redox-cofactor                                                           | 999,974   | 1,022,136 | lankacidin C                               | NRP + Polyketide | 13%  |
| T1PKS,NRPS                                                               | 1,655,187 | 1,718,254 | althiomycin                                | NRP              | 100% |
| NRPS                                                                     | 1,783,949 | 1,829,042 | -                                          | -                | -    |
| NRPS                                                                     | 1,894,302 | 1,940,359 | yersiniabactin                             | NRP + Polyketide | 4%   |
| NRPS                                                                     | 3,229,636 | 3,282,371 | cichoepetin                                | NRP              | 46%  |
| NRPS                                                                     | 4,131,908 | 4,191,899 | vulnibactin                                | NRP              | 12%  |
| NRPS-like                                                                | 4,315,209 | 4,358,190 | -                                          | -                | -    |
| RRE-containing                                                           | 4,362,837 | 4,383,103 | -                                          | -                | -    |
| betalactone                                                              | 4,586,311 | 4,611,980 | -                                          | -                | -    |
| <i>Serratia marcescens</i> strain SJC1054 genome assembly, chromosome: 1 |           |           |                                            |                  |      |
| NRPS                                                                     | 291,794   | 351,526   | vulnibactin                                | NRP              | 12%  |
| NRPS-like                                                                | 475,241   | 517,428   | -                                          | -                | -    |
| RRE-containing                                                           | 524,603   | 539,264   | -                                          | -                | -    |
| betalactone                                                              | 745,983   | 771,652   | -                                          | -                | -    |
| thiopeptide                                                              | 1,842,414 | 1,868,857 | O-antigen                                  | Saccharide       | 14%  |
| siderophore                                                              | 2,054,504 | 2,066,363 | -                                          | -                | -    |
| redox-cofactor                                                           | 2,592,705 | 2,614,867 | lankacidin C                               | NRP + Polyketide | 13%  |



|                                                                                                            |                  |                  |                         |                         |             |
|------------------------------------------------------------------------------------------------------------|------------------|------------------|-------------------------|-------------------------|-------------|
| T1PKS,NRPS                                                                                                 | 3,247,919        | 3,310,986        | althiomycin             | NRP                     | 100%        |
| NRPS                                                                                                       | 3,376,681        | 3,421,774        | -                       | -                       | -           |
| NRPS                                                                                                       | 3,487,034        | 3,533,091        | yersiniabactin          | NRP + Polyketide        | 4%          |
| NRPS                                                                                                       | 4,822,071        | 4,875,261        | orfamide A / orfamide C | NRP:Cyclic depsipeptide | 17%         |
| <i>Serratia marcescens subsp. marcescens</i> ATCC 13880 substr. Sm_S97_jyu2015 chromosome, complete genome |                  |                  |                         |                         |             |
| NRPS                                                                                                       | 299,729          | 358,346          | vulnibactin             | NRP                     | 12%         |
| NRPS-like                                                                                                  | 480,799          | 520,920          | -                       | -                       | -           |
| betalactone                                                                                                | 758,651          | 784,322          | -                       | -                       | -           |
| <b>prodigiosin</b>                                                                                         | <b>1,139,869</b> | <b>1,174,889</b> | <b>prodigiosin</b>      | <b>Polyketide</b>       | <b>100%</b> |
| thiopeptide                                                                                                | 1,767,991        | 1,794,435        | O-antigen               | Saccharide              | 14%         |
| NRPS                                                                                                       | 2,368,848        | 2,415,859        | microcin H47            | RiPP:Microcin           | 20%         |
| redox-cofactor                                                                                             | 2,490,765        | 2,512,927        | lankacidin C            | NRP + Polyketide        | 13%         |
| NRPS                                                                                                       | 2,542,776        | 2,589,195        | pyrronazol B            | NRP + Polyketide        | 9%          |
| NRPS                                                                                                       | 4,577,071        | 4,621,009        | xantholipin             | Polyketide              | 4%          |
| <i>Serratia marcescens subsp. marcescens</i> ATCC 13880 substr. Sm_S9_jyu2015 chromosome, complete genome  |                  |                  |                         |                         |             |
| NRPS                                                                                                       | 299,729          | 358,346          | vulnibactin             | NRP                     | 12%         |
| NRPS-like                                                                                                  | 480,799          | 520,920          | -                       | -                       | -           |
| betalactone                                                                                                | 758,651          | 784,322          | -                       | -                       | -           |
| <b>prodigiosin</b>                                                                                         | <b>1,139,869</b> | <b>1,174,889</b> | <b>prodigiosin</b>      | <b>Polyketide</b>       | <b>100%</b> |
| thiopeptide                                                                                                | 1,767,948        | 1,794,392        | O-antigen               | Saccharide              | 14%         |
| NRPS                                                                                                       | 2,368,805        | 2,415,816        | microcin H47            | RiPP:Microcin           | 20%         |
| redox-cofactor                                                                                             | 2,490,722        | 2,512,884        | lankacidin C            | NRP + Polyketide        | 13%         |
| NRPS                                                                                                       | 2,542,733        | 2,589,152        | pyrronazol B            | NRP + Polyketide        | 9%          |
| NRPS                                                                                                       | 4,577,027        | 4,620,965        | xantholipin             | Polyketide              | 4%          |
| <i>Serratia marcescens subsp. marcescens</i> ATCC 13880 substr. Sm_SA_jyu2015 chromosome, complete genome  |                  |                  |                         |                         |             |
| NRPS                                                                                                       | 299,729          | 358,346          | vulnibactin             | NRP                     | 12%         |
| NRPS-like                                                                                                  | 480,799          | 520,920          | -                       | -                       | -           |
| betalactone                                                                                                | 758,651          | 784,322          | -                       | -                       | -           |
| <b>prodigiosin</b>                                                                                         | <b>1,139,869</b> | <b>1,174,889</b> | <b>prodigiosin</b>      | <b>Polyketide</b>       | <b>100%</b> |
| thiopeptide                                                                                                | 1,767,949        | 1,794,393        | O-antigen               | Saccharide              | 14%         |

|                                                                         |                  |                  |                                            |                   |             |
|-------------------------------------------------------------------------|------------------|------------------|--------------------------------------------|-------------------|-------------|
| NRPS                                                                    | 2,368,806        | 2,415,817        | microcin H47                               | RiPP:Microcin     | 20%         |
| redox-cofactor                                                          | 2,490,723        | 2,512,885        | lankacidin C                               | NRP + Polyketide  | 13%         |
| NRPS                                                                    | 2,542,734        | 2,589,153        | pyrronazol B                               | NRP + Polyketide  | 9%          |
| NRPS                                                                    | 4,577,029        | 4,620,967        | xantholipin                                | Polyketide        | 4%          |
| <i>Serratia marcescens subsp. marcescens</i> Db11, complete genome      |                  |                  |                                            |                   |             |
| betalactone                                                             | 60,868           | 86,536           | -                                          | -                 | -           |
| thiopeptide                                                             | 1,024,305        | 1,050,756        | O-antigen                                  | Saccharide        | 14%         |
| NRPS                                                                    | 1,619,286        | 1,666,298        | microcin H47                               | RiPP:Microcin     | 20%         |
| RRE-containing                                                          | 1,754,535        | 1,774,813        | lankacidin C                               | NRP + Polyketide  | 13%         |
| NRPS                                                                    | 1,796,558        | 1,843,060        | pyrronazol B                               | NRP + Polyketide  | 9%          |
| TIPKS,NRPS                                                              | 2,395,828        | 2,457,825        | althiomycin                                | NRP               | 100%        |
| arylpolyene                                                             | 3,839,497        | 3,883,093        | aryl polyenes                              | Other             | 100%        |
| NRPS                                                                    | 3,883,633        | 3,940,276        | rhizomide A / rhizomide B<br>/ rhizomide C | NRP               | 100%        |
| RiPP-like                                                               | 4,500,368        | 4,512,896        | -                                          | -                 | -           |
| NRPS                                                                    | 4,715,800        | 4,775,756        | vulnibactin                                | NRP               | 18%         |
| NRPS-like                                                               | 4,933,385        | 4,976,369        | -                                          | -                 | -           |
| <i>Serratia marcescens</i> WW4, complete genome                         |                  |                  |                                            |                   |             |
| NRPS                                                                    | 329,936          | 388,977          | vulnibactin                                | NRP               | 18%         |
| betalactone                                                             | 807,967          | 833,637          | -                                          | -                 | -           |
| redox-cofactor                                                          | 1,030,071        | 1,051,482        | lankacidin C                               | NRP + Polyketide  | 13%         |
| <b>prodigiosin</b>                                                      | <b>1,204,774</b> | <b>1,239,794</b> | <b>prodigiosin</b>                         | <b>Polyketide</b> | <b>100%</b> |
| thiopeptide                                                             | 1,842,979        | 1,869,424        | O-antigen                                  | Saccharide        | 14%         |
| redox-cofactor                                                          | 2,595,048        | 2,617,210        | lankacidin C                               | NRP + Polyketide  | 13%         |
| NRPS                                                                    | 2,635,571        | 2,682,136        | pyrronazol B                               | NRP + Polyketide  | 9%          |
| NRPS                                                                    | 3,359,430        | 3,403,192        | -                                          | -                 | -           |
| NRPS                                                                    | 4,730,647        | 4,774,585        | xantholipin                                | Polyketide        | 4%          |
| <i>Serratia nematodiphila</i> strain DH-S01 chromosome, complete genome |                  |                  |                                            |                   |             |
| NRPS                                                                    | 270,826          | 329,600          | vulnibactin                                | NRP               | 18%         |
| betalactone                                                             | 737,420          | 763,089          | -                                          | -                 | -           |

|                                                              |                  |                  |                    |                   |             |
|--------------------------------------------------------------|------------------|------------------|--------------------|-------------------|-------------|
| redox-cofactor                                               | 966,089          | 987,140          | lankacidin C       | NRP + Polyketide  | 13%         |
| <b>NRPS,prodigiosin</b>                                      | <b>1,138,450</b> | <b>1,199,322</b> | <b>prodigiosin</b> | <b>Polyketide</b> | <b>100%</b> |
| thiopeptide                                                  | 1,785,395        | 1,811,839        | O-antigen          | Saccharide        | 14%         |
| NRPS                                                         | 2,418,527        | 2,464,724        | microcin H47       | RiPP:Microcin     | 13%         |
| redox-cofactor                                               | 2,543,865        | 2,566,027        | lankacidin C       | NRP + Polyketide  | 13%         |
| NRPS                                                         | 2,574,938        | 2,622,872        | -                  | -                 | -           |
| NRPS                                                         | 3,240,739        | 3,317,255        | ravidomycin        | Polyketide        | 5%          |
| NRPS                                                         | 4,706,161        | 4,750,096        | xantholipin        | Polyketide        | 4%          |
| <i>Serratia sp.</i> FDAARGOS_506 chromosome, complete genome |                  |                  |                    |                   |             |
| NRPS                                                         | 981,778          | 1,024,295        | R1128              | Polyketide        | 14%         |
| NRPS                                                         | 1,788,075        | 1,847,910        | turnerbactin       | NRP               | 30%         |
| betalactone                                                  | 2,183,474        | 2,209,141        | -                  | -                 | -           |
| thiopeptide                                                  | 3,154,703        | 3,181,145        | O-antigen          | Saccharide        | 14%         |
| RRE-containing                                               | 3,804,251        | 3,824,529        | lankacidin C       | NRP + Polyketide  | 13%         |
| <i>Serratia sp.</i> FS14, complete genome                    |                  |                  |                    |                   |             |
| betalactone                                                  | 118,946          | 144,616          | -                  | -                 | -           |
| NRPS                                                         | 520,270          | 562,659          | enterobactin       | NRP               | 12%         |
| NRPS                                                         | 1,367,361        | 1,410,107        | xantholipin        | Polyketide        | 4%          |
| NRPS-like,thiopeptide,LAP                                    | 2,282,421        | 2,329,041        | microcin E492      | RiPP:Microcin     | 12%         |
| NRPS                                                         | 2,838,063        | 2,914,575        | ravidomycin        | Polyketide        | 5%          |
| NRPS                                                         | 3,584,001        | 3,632,511        | turnerbactin       | NRP               | 15%         |
| redox-cofactor                                               | 3,635,442        | 3,657,604        | lankacidin C       | NRP + Polyketide  | 13%         |
| thiopeptide                                                  | 4,341,885        | 4,368,329        | O-antigen          | Saccharide        | 14%         |
| <b>prodigiosin</b>                                           | <b>4,984,802</b> | <b>5,019,822</b> | <b>prodigiosin</b> | <b>Polyketide</b> | <b>100%</b> |
| <i>Serratia sp.</i> HRI chromosome, complete genome          |                  |                  |                    |                   |             |
| RRE-containing                                               | 51,492           | 71,770           | lankacidin C       | NRP + Polyketide  | 13%         |
| siderophore                                                  | 615,034          | 626,893          | -                  | -                 | -           |
| thiopeptide                                                  | 778,811          | 805,253          | O-antigen          | Saccharide        | 14%         |
| betalactone                                                  | 1,898,614        | 1,924,284        | -                  | -                 | -           |
| NRPS-like                                                    | 2,160,759        | 2,202,954        | -                  | -                 | -           |

|                                                              |                |                |                                            |                   |            |
|--------------------------------------------------------------|----------------|----------------|--------------------------------------------|-------------------|------------|
| NRPS                                                         | 2,319,451      | 2,378,422      | vulnibactin                                | NRP               | 12%        |
| NRPS                                                         | 3,173,401      | 3,230,608      | rhizomide A / rhizomide B<br>/ rhizomide C | NRP               | 100%       |
| NRPS                                                         | 4,641,719      | 4,684,660      | -                                          | -                 | -          |
| NRPS,T1PKS                                                   | 4,772,658      | 4,835,570      | althiomycin                                | NRP               | 100%       |
| <i>Serratia</i> sp. JKS000199 genome assembly, chromosome: I |                |                |                                            |                   |            |
| <b>NRPS</b>                                                  | <b>407,871</b> | <b>452,538</b> | <b>prodigiosin</b>                         | <b>Polyketide</b> | <b>12%</b> |
| thiopeptide                                                  | 1,057,678      | 1,083,422      | O-antigen                                  | Saccharide        | 14%        |
| RRE-containing                                               | 1,722,738      | 1,743,016      | lankacidin C                               | NRP + Polyketide  | 13%        |
| T1PKS,NRPS                                                   | 1,754,014      | 1,823,956      | pyrronazol B                               | NRP + Polyketide  | 9%         |
| NRPS                                                         | 2,444,730      | 2,530,512      |                                            |                   |            |
| thiopeptide,LAP,NRPS                                         | 3,031,011      | 3,078,357      | microcin E492                              | RiPP:Microcin     | 12%        |
| NRPS                                                         | 3,848,791      | 3,905,540      | xenotetrape-ptide                          | NRP-              | -100%      |
| hserlactone                                                  | 4,434,954      | 4,455,628      | -                                          | -                 | -          |
| NRPS                                                         | 4,687,820      | 4,747,807      | vulnibactin                                | NRP               | 12%        |
| <i>Serratia</i> sp. LS-1 chromosome, complete genome         |                |                |                                            |                   |            |
| betalactone                                                  | 60,998         | 86,666         | -                                          | -                 | -          |
| <b>NRPS</b>                                                  | <b>458,441</b> | <b>503,640</b> | <b>prodigiosin</b>                         | <b>Polyketide</b> | <b>12%</b> |
| thiopeptide                                                  | 1,131,760      | 1,157,501      | O-antigen                                  | Saccharide        | 14%        |
| RRE-containing                                               | 1,826,788      | 1,847,066      | lankacidin C                               | NRP + Polyketide  | 13%        |
| T1PKS,NRPS                                                   | 1,856,123      | 1,926,240      | pyrronazol B                               | NRP + Polyketide  | 9%         |
| NRPS                                                         | 2,545,248      | 2,621,858      | ravidomycin                                | Polyketide        | 5%         |
| thiopeptide,LAP,NRPS                                         | 3,124,460      | 3,171,810      | microcin E492                              | RiPP:Microcin     | 12%        |
| NRPS                                                         | 3,919,990      | 3,976,734      | rhizomide A / rhizomide B<br>/ rhizomide C | NRP               | 100%       |
| hserlactone                                                  | 4,513,748      | 4,534,422      | -                                          | -                 | -          |
| NRPS                                                         | 4,767,060      | 4,827,050      | vulnibactin                                | NRP               | 12%        |
| <i>Serratia</i> sp. SSNIH1 chromosome, complete genome       |                |                |                                            |                   |            |
| NRPS                                                         | 775,160        | 834,356        | vulnibactin                                | NRP               | 12%        |
| NRPS-like                                                    | 912,465        | 992,709        | -                                          | -                 | -          |
| betalactone                                                  | 1,197,509      | 1,223,182      | -                                          | -                 | -          |

|                                                                     |           |           |                                            |                  |      |
|---------------------------------------------------------------------|-----------|-----------|--------------------------------------------|------------------|------|
| thiopeptide                                                         | 2,273,286 | 2,299,728 | O-antigen                                  | Saccharide       | 14%  |
| siderophore                                                         | 2,449,698 | 2,461,557 | -                                          | -                | -    |
| redox-cofactor                                                      | 2,970,905 | 2,993,067 | lankacidin C                               | NRP + Polyketide | 13%  |
| T1PKS,NRPS                                                          | 3,696,584 | 3,757,175 | althiomycin                                | NRP              | 87%  |
| NRPS                                                                | 3,808,016 | 3,853,115 | -                                          | -                | -    |
| NRPS                                                                | 5,189,111 | 5,246,963 | rhizomide A / rhizomide B<br>/ rhizomide C | NRP              | 100% |
| <i>Serratia marcescens</i> strain UMH1 chromosome, complete genome  |           |           |                                            |                  |      |
| betalactone                                                         | 60,784    | 86,452    | -                                          | -                | -    |
| thiopeptide                                                         | 1,050,165 | 1,076,609 | O-antigen                                  | Saccharide       | 14%  |
| NRPS                                                                | 1,654,124 | 1,701,133 | microcin H47                               | RiPP:Microcin    | 20%  |
| RRE-containing                                                      | 1,785,712 | 1,805,990 | lankacidin C                               | NRP + Polyketide | 13%  |
| NRPS                                                                | 1,827,873 | 1,874,287 | pyrronazol B                               | NRP + Polyketide | 9%   |
| T1PKS,NRPS                                                          | 2,436,069 | 2,498,066 | althiomycin                                | NRP              | 100% |
| NRPS                                                                | 3,858,692 | 3,913,460 | rhizomide A / rhizomide B<br>/ rhizomide C | NRP              | 100% |
| NRPS                                                                | 4,695,729 | 4,755,684 | vulnibactin                                | NRP              | 18%  |
| NRPS-like,hserlactone                                               | 4,881,993 | 4,934,209 | -                                          | -                | -    |
| <i>Serratia marcescens</i> strain UMH10 chromosome, complete genome |           |           |                                            |                  |      |
| betalactone                                                         | 60,785    | 86,453    | -                                          | -                | -    |
| thiopeptide                                                         | 1,048,395 | 1,074,838 | O-antigen                                  | Saccharide       | 14%  |
| NRPS                                                                | 1,642,516 | 1,689,526 | microcin H47                               | RiPP:Microcin    | 20%  |
| RRE-containing                                                      | 1,776,113 | 1,796,391 | lankacidin C                               | NRP + Polyketide | 13%  |
| NRPS                                                                | 1,818,797 | 1,865,274 | pyrronazol B                               | NRP + Polyketide | 9%   |
| T1PKS,NRPS                                                          | 2,436,245 | 2,498,248 | althiomycin                                | NRP              | 100% |
| NRPS                                                                | 3,948,603 | 4,003,373 | rhizomide A / rhizomide B<br>/ rhizomide C | NRP              | 100% |
| NRPS                                                                | 4,812,232 | 4,872,188 | vulnibactin                                | NRP              | 18%  |
| NRPS-like,hserlactone                                               | 4,996,478 | 5,048,547 | -                                          | -                | -    |
| <i>Serratia marcescens</i> strain UMH11 chromosome, complete genome |           |           |                                            |                  |      |
| betalactone                                                         | 60,785    | 86,453    | -                                          | -                | -    |

|                                                                           |           |           |                                            |                  |      |
|---------------------------------------------------------------------------|-----------|-----------|--------------------------------------------|------------------|------|
| thiopeptide                                                               | 1,048,396 | 1,074,839 | O-antigen                                  | Saccharide       | 14%  |
| NRPS                                                                      | 1,642,520 | 1,689,530 | microcin H47                               | RiPP:Microcin    | 20%  |
| RRE-containing                                                            | 1,776,117 | 1,796,395 | lankacidin C                               | NRP + Polyketide | 13%  |
| NRPS                                                                      | 1,818,801 | 1,865,278 | pyrronazol B                               | NRP + Polyketide | 9%   |
| T1PKS,NRPS                                                                | 2,436,248 | 2,498,251 | althiomycin                                | NRP              | 100% |
| NRPS                                                                      | 3,948,606 | 4,003,376 | rhizomide A / rhizomide B<br>/ rhizomide C | NRP              | 100% |
| NRPS                                                                      | 4,812,235 | 4,872,191 | vulnibactin                                | NRP              | 18%  |
| NRPS-like,hsrlactone                                                      | 4,996,482 | 5,048,551 | -                                          | -                | -    |
| <i>Serratia marcescens</i> strain UMH12 chromosome, complete genome       |           |           |                                            |                  |      |
| betalactone                                                               | 60,784    | 86,452    | -                                          | -                | -    |
| thiopeptide                                                               | 1,041,164 | 1,067,607 | O-antigen                                  | Saccharide       | 14%  |
| NRPS                                                                      | 1,640,561 | 1,687,563 | microcin H47                               | RiPP:Microcin    | 20%  |
| RRE-containing                                                            | 1,777,303 | 1,797,581 | lankacidin C                               | NRP + Polyketide | 13%  |
| NRPS                                                                      | 1,819,465 | 1,865,716 | pyrronazol B                               | NRP + Polyketide | 9%   |
| T1PKS,NRPS                                                                | 2,558,541 | 2,620,538 | althiomycin                                | NRP              | 100% |
| NRPS                                                                      | 3,989,895 | 4,044,666 | rhizomide A / rhizomide B<br>/ rhizomide C | NRP              | 100% |
| NRPS                                                                      | 4,828,128 | 4,888,083 | vulnibactin                                | NRP              | 18%  |
| NRPS-like,hsrlactone                                                      | 5,010,822 | 5,062,889 | -                                          | -                | -    |
| <i>Serratia marcescens</i> strain UMH2 chromosome, complete genome        |           |           |                                            |                  |      |
| betalactone                                                               | 61,013    | 86,681    | -                                          | -                | -    |
| thiopeptide                                                               | 1,098,231 | 1,123,986 | O-antigen                                  | Saccharide       | 14%  |
| RRE-containing                                                            | 1,862,442 | 1,882,720 | lankacidin C                               | NRP + Polyketide | 13%  |
| T1PKS,NRPS                                                                | 1,909,785 | 1,979,587 | pyrronazol B                               | NRP + Polyketide | 9%   |
| NRPS                                                                      | 2,618,711 | 2,704,491 | -                                          | -                | -    |
| thiopeptide,LAP,NRPS                                                      | 3,220,159 | 3,267,506 | microcin E492                              | RiPP:Microcin    | 12%  |
| NRPS                                                                      | 4,082,584 | 4,139,329 | xenotetrapeptide                           | NRP              | 100% |
| hsrlactone                                                                | 4,688,976 | 4,709,650 | -                                          | -                | -    |
| NRPS                                                                      | 4,941,738 | 5,001,728 | vulnibactin                                | NRP              | 12%  |
| <i>Serratia marcescens</i> strain FDAARGOS_65 chromosome, complete genome |           |           |                                            |                  |      |

|                                                                  |                  |                  |                                            |                               |             |
|------------------------------------------------------------------|------------------|------------------|--------------------------------------------|-------------------------------|-------------|
| NRPS                                                             | 357,494          | 402,638          | pyrronazol B                               | NRP + Polyketide              | 9%          |
| RRE-containing                                                   | 423,039          | 443,317          | lankacidin C                               | NRP + Polyketide              | 13%         |
| NRPS                                                             | 525,965          | 572,683          | colicin V                                  | RiPP                          | 1%          |
| thiopeptide                                                      | 1,190,014        | 1,216,455        | O-antigen                                  | Saccharide                    | 14%         |
| <b>NRPS</b>                                                      | <b>1,812,941</b> | <b>1,857,616</b> | <b>prodigiosin</b>                         | <b>Polyketide</b>             | <b>12%</b>  |
| betalactone                                                      | 2,250,588        | 2,276,257        | -                                          | -                             | -           |
| hserlactone                                                      | 2,489,101        | 2,509,793        | -                                          | -                             | -           |
| NRPS                                                             | 2,664,903        | 2,722,606        | vulnibactin                                | NRP                           | 18%         |
| NRPS                                                             | 3,529,737        | 3,586,582        | rhizomide A / rhizomide B<br>/ rhizomide C | NRP                           | 100%        |
| RiPP-like                                                        | 4,442,267        | 4,454,813        | -                                          | -                             | -           |
| NRPS                                                             | 4,794,323        | 4,851,180        | gobichelin A / gobichelin B                | NRP                           | 11%         |
| NRPS                                                             | 4,914,220        | 4,964,236        | lipopolysaccharide                         | Saccharide:Lipopolysaccharide | 5%          |
| <i>Serratia marcescens</i> strain FDAARGOS_659 chromosome        |                  |                  |                                            |                               |             |
| betalactone                                                      | 103,673          | 129,343          | -                                          | -                             | -           |
| redox-cofactor                                                   | 306,443          | 326,929          | lankacidin C                               | NRP + Polyketide              | 13%         |
| <b>prodigiosin</b>                                               | <b>481,796</b>   | <b>516,816</b>   | <b>prodigiosin</b>                         | <b>Polyketide</b>             | <b>100%</b> |
| thiopeptide                                                      | 1,095,484        | 1,121,928        | O-antigen                                  | Saccharide                    | 14%         |
| redox-cofactor                                                   | 1,784,320        | 1,806,482        | lankacidin C                               | NRP + Polyketide              | 13%         |
| NRPS                                                             | 1,820,062        | 1,867,803        | pyrronazol B                               | NRP + Polyketide              | 9%          |
| NRPS                                                             | 2,504,556        | 2,548,312        | -                                          | -                             | -           |
| NRPS                                                             | 3,922,400        | 3,965,575        | xantholipin                                | Polyketide                    | 4%          |
| NRPS                                                             | 4,736,164        | 4,796,006        | vulnibactin                                | NRP                           | 18%         |
| <i>Serratia marcescens</i> strain FY chromosome, complete genome |                  |                  |                                            |                               |             |
| NRPS                                                             | 279,793          | 338,100          | vulnibactin                                | NRP                           | 12%         |
| betalactone                                                      | 689,261          | 714,929          | -                                          | -                             | -           |
| redox-cofactor                                                   | 894,323          | 915,612          | lankacidin C                               | NRP + Polyketide              | 13%         |
| <b>prodigiosin</b>                                               | <b>1,068,190</b> | <b>1,103,210</b> | <b>prodigiosin</b>                         | <b>Polyketide</b>             | <b>100%</b> |
| thiopeptide                                                      | 1,687,236        | 1,713,680        | O-antigen                                  | Saccharide                    | 14%         |
| NRPS                                                             | 2,283,030        | 2,328,314        | microcin H47                               | RiPP:Microcin                 | 20%         |

|                                                                      |                  |                  |                    |                   |             |
|----------------------------------------------------------------------|------------------|------------------|--------------------|-------------------|-------------|
| redox-cofactor                                                       | 2,409,143        | 2,431,305        | lankacidin C       | NRP + Polyketide  | 13%         |
| NRPS                                                                 | 2,434,744        | 2,481,565        | turnerbactin       | NRP               | 15%         |
| NRPS                                                                 | 3,131,895        | 3,175,651        | -                  | -                 | -           |
| RiPP-like                                                            | 3,619,671        | 3,632,199        | -                  | -                 | -           |
| NRPS                                                                 | 4,503,410        | 4,547,348        | xantholipin        | Polyketide        | 4%          |
| <i>Serratia marcescens</i> strain FZSF02 chromosome, complete genome |                  |                  |                    |                   |             |
| NRPS                                                                 | 292,086          | 351,080          | vulnibactin        | NRP               | 18%         |
| betalactone                                                          | 750,034          | 775,704          | -                  | -                 | -           |
| <b>prodigiosin</b>                                                   | <b>1,149,547</b> | <b>1,184,567</b> | <b>prodigiosin</b> | <b>Polyketide</b> | <b>100%</b> |
| thiopeptide                                                          | 1,831,194        | 1,857,638        | O-antigen          | Saccharide        | 14%         |
| redox-cofactor                                                       | 2,572,385        | 2,594,547        | lankacidin C       | NRP + Polyketide  | 13%         |
| NRPS                                                                 | 2,620,445        | 2,667,611        | turnerbactin       | NRP               | 15%         |
| NRPS                                                                 | 3,333,029        | 3,376,799        | -                  | -                 | -           |
| NRPS                                                                 | 4,778,265        | 4,822,203        | xantholipin        | Polyketide        | 4%          |
| <i>Serratia marcescens</i> strain ICU-2 chromosome                   |                  |                  |                    |                   |             |
| hserlactone                                                          | 68,823           | 89,497           | -                  | -                 | -           |
| NRPS-like                                                            | 506,362          | 548,668          | -                  | -                 | -           |
| betalactone                                                          | 769,294          | 794,963          | -                  | -                 | -           |
| <b>NRPS</b>                                                          | <b>1,145,167</b> | <b>1,189,833</b> | <b>prodigiosin</b> | <b>Polyketide</b> | <b>12%</b>  |
| thiopeptide                                                          | 1,727,664        | 1,754,102        | O-antigen          | Saccharide        | 14%         |
| NRPS                                                                 | 2,309,939        | 2,356,426        | colicin V          | RiPP              | 1%          |
| RRE-containing                                                       | 2,427,864        | 2,448,142        | lankacidin C       | NRP + Polyketide  | 13%         |
| NRPS                                                                 | 2,465,875        | 2,511,492        | -                  | -                 | -           |
| NRPS                                                                 | 4,473,726        | 4,521,571        | syringopeptin 25A  | NRP               | 100%        |
| NRPS,T1PKS                                                           | 4,756,503        | 4,811,124        | -                  | -                 | --          |
| <i>Serratia marcescens</i> strain ICU-3 chromosome                   |                  |                  |                    |                   |             |
| betalactone                                                          | 63,175           | 88,843           | -                  | -                 | -           |
| <b>NRPS</b>                                                          | <b>438,566</b>   | <b>483,230</b>   | <b>prodigiosin</b> | <b>Polyketide</b> | <b>12%</b>  |
| thiopeptide                                                          | 1,056,133        | 1,082,571        | O-antigen          | Saccharide        | 14%         |
| NRPS                                                                 | 1,638,146        | 1,684,531        | colicin V          | RiPP              | 1%          |



|                                                                      |                  |                  |                     |                   |             |
|----------------------------------------------------------------------|------------------|------------------|---------------------|-------------------|-------------|
| RRE-containing                                                       | 1,759,572        | 1,779,850        | lankacidin C        | NRP + Polyketide  | 13%         |
| NRPS                                                                 | 2,495,657        | 2,543,793        | -                   | -                 | -           |
| NRPS                                                                 | 3,776,395        | 3,830,663        | thanamycin          | NRP:Beta-lactam   | 18%         |
| NRPS,T1PKS                                                           | 4,060,517        | 4,114,670        | -                   | -                 | -           |
| hserlactone                                                          | 4,368,517        | 4,389,191        | -                   | -                 | -           |
| NRPS                                                                 | 4,643,966        | 4,687,910        | turnerbactin        | NRP               | 23%         |
| NRPS-like                                                            | 4,843,178        | 4,886,165        | -                   | -                 | -           |
| <i>Serratia marcescens</i> strain ICU-4 chromosome                   |                  |                  |                     |                   |             |
| betalactone                                                          | 62,962           | 88,630           | -                   | -                 | -           |
| <b>NRPS</b>                                                          | <b>438,302</b>   | <b>483,362</b>   | <b>prodigiosin</b>  | <b>Polyketide</b> | <b>12%</b>  |
| thiopeptide                                                          | 1,017,929        | 1,044,367        | -                   | -                 | -           |
| NRPS                                                                 | 1,600,569        | 1,645,273        | colicin V           | RiPP              | 1%          |
| RRE-containing                                                       | 1,720,103        | 1,740,381        | lankacidin C        | NRP + Polyketide  | 20%         |
| NRPS                                                                 | 3,729,192        | 3,782,018        | Le-pyrrolopyrazines | NRP               | 27%         |
| NRPS                                                                 | 4,010,500        | 4,065,120        | -                   | -                 | -           |
| hserlactone                                                          | 4,395,476        | 4,416,150        | -                   | -                 | -           |
| NRPS-like                                                            | 4,848,420        | 4,890,712        | -                   | -                 | -           |
| NRPS-like                                                            | 5,183,622        | 5,209,716        | nannocystin a       | NRP + Polyketide  | 21%         |
| <i>Serratia marcescens</i> strain JW-CZ2 chromosome, complete genome |                  |                  |                     |                   |             |
| NRPS                                                                 | 628,929          | 671,919          | xantholipin         | Polyketide        | 4%          |
| NRPS                                                                 | 2,577,090        | 2,623,679        | pyrronazol B        | NRP + Polyketide  | 9%          |
| redox-cofactor                                                       | 2,658,049        | 2,680,211        | lankacidin C        | NRP + Polyketide  | 13%         |
| NRPS                                                                 | 2,761,695        | 2,807,568        | microcin H47        | RiPP:Microcin     | 20%         |
| thiopeptide                                                          | 3,365,828        | 3,392,272        | O-antigen           | Saccharide        | 14%         |
| <b>prodigiosin</b>                                                   | <b>3,972,294</b> | <b>4,007,314</b> | <b>prodigiosin</b>  | <b>Polyketide</b> | <b>100%</b> |
| betalactone                                                          | 4,352,236        | 4,377,906        | -                   | -                 | -           |
| hserlactone,NRPS-like                                                | 4,556,975        | 4,608,541        | -                   | -                 | -           |
| NRPS                                                                 | 4,730,868        | 4,790,691        | vulnibactin         | NRP               | 18%         |
| <i>Serratia marcescens</i> strain KS10 chromosome                    |                  |                  |                     |                   |             |
| NRPS                                                                 | 72,422           | 115,598          | xantholipin         | Polyketide        | 4%          |

|                                                                       |                  |                  |                         |                                      |             |
|-----------------------------------------------------------------------|------------------|------------------|-------------------------|--------------------------------------|-------------|
| NRPS                                                                  | 1,457,499        | 1,501,253        | -                       | -                                    | -           |
| NRPS                                                                  | 2,147,430        | 2,193,947        | pyrronazol B            | NRP + Polyketide                     | 9%          |
| redox-cofactor                                                        | 2,213,809        | 2,234,868        | lankacidin C            | NRP + Polyketide                     | 13%         |
| thiopeptide                                                           | 2,987,155        | 3,013,599        | O-antigen               | Saccharide                           | 14%         |
| <b>prodigiosin</b>                                                    | <b>3,605,793</b> | <b>3,640,813</b> | <b>prodigiosin</b>      | <b>Polyketide</b>                    | <b>100%</b> |
| redox-cofactor                                                        | 3,793,379        | 3,815,541        | lankacidin C            | NRP + Polyketide                     | 13%         |
| betalactone                                                           | 3,986,079        | 4,011,749        | -                       | -                                    | -           |
| NRPS                                                                  | 4,400,917        | 4,460,758        | vulnibactin             | NRP                                  | 18%         |
| <i>Serratia marcescens</i> strain LVF3 chromosome, complete genome    |                  |                  |                         |                                      |             |
| NRPS                                                                  | 270,894          | 329,117          | vulnibactin             | NRP                                  | 18%         |
| hserlactone                                                           | 576,985          | 597,677          | -                       | -                                    | -           |
| betalactone                                                           | 787,022          | 812,711          | -                       | -                                    | -           |
| thiopeptide                                                           | 1,859,438        | 1,885,880        | O-antigen               | Saccharide                           | 14%         |
| RRE-containing                                                        | 2,655,355        | 2,675,633        | lankacidin C            | NRP + Polyketide                     | 13%         |
| T1PKS,NRPS                                                            | 2,682,525        | 2,749,394        | pyrronazol B            | NRP + Polyketide                     | 9%          |
| NRPS                                                                  | 3,404,896        | 3,448,585        | -                       | -                                    | -           |
| NRPS-like,arylpolyyene                                                | 3,478,555        | 3,526,663        | andrimid                | NRP:Beta-lactam + Polyketide:Type II | 95%         |
| T1PKS                                                                 | 4,417,765        | 4,458,747        | -                       | -                                    | -           |
| siderophore                                                           | 4,658,418        | 4,670,277        | -                       | -                                    | -           |
| NRPS                                                                  | 4,861,191        | 4,914,409        | lokisin                 | NRP                                  | 21%         |
| NRPS,T1PKS                                                            | 5,146,930        | 5,201,552        | -                       | -                                    | -           |
| <i>Serratia marcescens</i> strain WVU-002 chromosome, complete genome |                  |                  |                         |                                      |             |
| NRPS                                                                  | 262,689          | 321,011          | vulnibactin             | NRP                                  | 18%         |
| NRPS-like                                                             | 453,528          | 494,770          | -                       | -                                    | -           |
| betalactone                                                           | 711,400          | 737,069          | -                       | -                                    | -           |
| NRPS,T1PKS                                                            | 1,223,026        | 1,278,651        | olimycin A / olimycin B | Polyketide                           | 5%          |
| thiopeptide                                                           | 1,851,898        | 1,878,341        | O-antigen               | Saccharide                           | 14%         |
| RRE-containing                                                        | 2,609,714        | 2,629,992        | lankacidin C            | NRP + Polyketide                     | 13%         |
| NRPS                                                                  | 2,651,206        | 2,698,989        | pyrronazol B            | NRP + Polyketide                     | 9%          |

|                                                                       |           |           |                         |                  |      |
|-----------------------------------------------------------------------|-----------|-----------|-------------------------|------------------|------|
| NRPS                                                                  | 3,340,206 | 3,425,890 | -                       | -                | -    |
| NRPS                                                                  | 4,749,364 | 4,806,970 | xenotetrapeptide        | NRP              | 100% |
| <i>Serratia marcescens</i> strain WVU-004 chromosome, complete genome |           |           |                         |                  |      |
| NRPS                                                                  | 262,725   | 321,047   | vulnibactin             | NRP              | 18%  |
| NRPS-like                                                             | 453,564   | 494,806   | -                       | -                | -    |
| betalactone                                                           | 711,436   | 737,105   | -                       | -                | -    |
| NRPS,T1PKS                                                            | 1,223,062 | 1,278,687 | olimycin A / olimycin B | Polyketide       | 5%   |
| thiopeptide                                                           | 1,851,933 | 1,878,376 | O-antigen               | Saccharide       | 14%  |
| RRE-containing                                                        | 2,609,750 | 2,630,028 | lankacidin C            | NRP + Polyketide | 13%  |
| NRPS                                                                  | 2,651,242 | 2,699,025 | pyrronazol B            | NRP + Polyketide | 9%   |
| NRPS                                                                  | 3,340,242 | 3,425,926 | -                       | -                | -    |
| NRPS                                                                  | 4,749,400 | 4,807,039 | xenotetrapeptide        | NRP              | 100% |
| <i>Serratia marcescens</i> strain WVU-007 chromosome, complete genome |           |           |                         |                  |      |
| NRPS                                                                  | 262,733   | 321,048   | vulnibactin             | NRP              | 18%  |
| NRPS-like                                                             | 453,565   | 494,807   | -                       | -                | -    |
| betalactone                                                           | 711,437   | 737,106   | -                       | -                | -    |
| NRPS,T1PKS                                                            | 1,222,702 | 1,278,328 | olimycin A / olimycin B | Polyketide       | 5%   |
| thiopeptide                                                           | 1,851,576 | 1,878,019 | O-antigen               | Saccharide       | 14%  |
| RRE-containing                                                        | 2,643,878 | 2,664,156 | lankacidin C            | NRP + Polyketide | 13%  |
| NRPS                                                                  | 2,685,346 | 2,733,129 | pyrronazol B            | NRP + Polyketide | 9%   |
| NRPS                                                                  | 3,374,346 | 3,460,030 | -                       | -                | -    |
| NRPS                                                                  | 4,766,976 | 4,824,828 | xenotetrapeptide        | NRP              | 100% |
| <i>Serratia marcescens</i> strain WVU-008 chromosome, complete genome |           |           |                         |                  |      |
| betalactone                                                           | 724,883   | 750,552   | -                       | -                | -    |
| thiopeptide                                                           | 1,856,534 | 1,882,971 | O-antigen               | Saccharide       | 14%  |
| RRE-containing                                                        | 2,589,923 | 2,610,201 | lankacidin C            | NRP + Polyketide | 13%  |
| NRPS                                                                  | 2,631,882 | 2,679,201 | pyrronazol B            | NRP + Polyketide | 9%   |
| NRPS                                                                  | 3,357,966 | 3,403,499 |                         |                  |      |
| NRPS                                                                  | 4,705,706 | 4,760,170 | thanamycin              | NRP:Beta-lactam  | 18%  |
| <i>Serratia marcescens</i> strain WVU-009 chromosome, complete genome |           |           |                         |                  |      |

|                                                                       |                  |                  |                         |                   |             |
|-----------------------------------------------------------------------|------------------|------------------|-------------------------|-------------------|-------------|
| hserlactone                                                           | 23,292           | 43,966           | -                       | -                 | -           |
| NRPS                                                                  | 290,044          | 347,904          | vulnibactin             | NRP               | 12%         |
| betalactone                                                           | 729,231          | 754,899          | -                       | -                 | -           |
| <b>NRPS</b>                                                           | <b>1,124,997</b> | <b>1,170,206</b> | <b>prodigiosin</b>      | <b>Polyketide</b> | <b>12%</b>  |
| thiopeptide                                                           | 1,790,895        | 1,816,576        | O-antigen               | Saccharide        | 14%         |
| RRE-containing                                                        | 2,508,330        | 2,528,608        | lankacidin C            | NRP + Polyketide  | 13%         |
| T1PKS                                                                 | 2,555,673        | 2,598,552        | pyrronazol B            | NRP + Polyketide  | 9%          |
| NRPS                                                                  | 3,229,609        | 3,315,384        | -                       | -                 | -           |
| thiopeptide,LAP,NRPS                                                  | 3,819,912        | 3,867,256        | microcin E492           | RiPP:Microcin     | 12%         |
| NRPS                                                                  | 4,751,178        | 4,809,024        | xenotetrapeptide        | NRP               | 100%        |
| <i>Serratia marcescens</i> strain WVU-010 chromosome, complete genome |                  |                  |                         |                   |             |
| NRPS                                                                  | 262,701          | 321,016          | vulnibactin             | NRP               | 18%         |
| NRPS-like                                                             | 453,533          | 494,775          | -                       | -                 | -           |
| betalactone                                                           | 711,405          | 737,074          | -                       | -                 | -           |
| NRPS,T1PKS                                                            | 1,222,671        | 1,278,297        | olimycin A / olimycin B | Polyketide        | 5%          |
| thiopeptide                                                           | 1,851,546        | 1,877,989        | O-antigen               | Saccharide        | 14%         |
| RRE-containing                                                        | 2,643,847        | 2,664,125        | lankacidin C            | NRP + Polyketide  | 13%         |
| NRPS                                                                  | 2,685,315        | 2,733,098        | pyrronazol B            | NRP + Polyketide  | 9%          |
| NRPS                                                                  | 3,374,315        | 3,459,999        | -                       | -                 | -           |
| NRPS                                                                  | 4,766,945        | 4,824,797        | xenotetrapeptide        | NRP               | 100%        |
| <i>Serratia marcescens</i> strain YHYF1 chromosome, complete genome   |                  |                  |                         |                   |             |
| NRPS                                                                  | 263,161          | 321,984          | vulnibactin             | NRP               | 18%         |
| NRPS-like,hserlactone                                                 | 525,454          | 574,703          | -                       | -                 | -           |
| betalactone                                                           | 781,253          | 806,923          | -                       | -                 | -           |
| <b>prodigiosin</b>                                                    | <b>1,150,979</b> | <b>1,186,005</b> | <b>prodigiosin</b>      | <b>Polyketide</b> | <b>100%</b> |
| hserlactone                                                           | 1,213,650        | 1,232,702        | olimycin A / olimycin B | Polyketide        | 5%          |
| thiopeptide                                                           | 1,825,114        | 1,851,558        | O-antigen               | Saccharide        | 14%         |
| NRPS                                                                  | 2,447,774        | 2,493,653        | microcin H47            | RiPP:Microcin     | 20%         |
| redox-cofactor                                                        | 2,570,197        | 2,592,359        | lankacidin C            | NRP + Polyketide  | 13%         |
| NRPS                                                                  | 2,623,653        | 2,671,574        | pyrronazol B            | NRP + Polyketide  | 9%          |

|                                                                                                            |                  |                  |                    |                   |             |
|------------------------------------------------------------------------------------------------------------|------------------|------------------|--------------------|-------------------|-------------|
| hserlactone                                                                                                | 3,743,913        | 3,764,545        | -                  | -                 | -           |
| NRPS                                                                                                       | 4,745,728        | 4,789,663        | xantholipin        | Polyketide        | 4%          |
| <i>Serratia marcescens subsp. marcescens</i> ATCC 13880 chromosome, complete genome                        |                  |                  |                    |                   |             |
| NRPS                                                                                                       | 1,114,925        | 1,158,447        | xantholipin        | Polyketide        | 4%          |
| NRPS                                                                                                       | 1,954,807        | 2,013,424        | vulnibactin        | NRP               | 12%         |
| NRPS-like                                                                                                  | 2,135,877        | 2,175,997        | -                  | -                 | -           |
| betalactone                                                                                                | 2,413,728        | 2,439,399        | -                  | -                 | -           |
| <b>prodigiosin</b>                                                                                         | <b>2,794,945</b> | <b>2,829,965</b> | <b>prodigiosin</b> | <b>Polyketide</b> | <b>100%</b> |
| thiopeptide                                                                                                | 3,423,043        | 3,449,487        | O-antigen          | Saccharide        | 14%         |
| NRPS                                                                                                       | 4,023,898        | 4,070,909        | microcin H47       | RiPP:Microcin     | 20%         |
| redox-cofactor                                                                                             | 4,145,815        | 4,167,977        | lankacidin C       | NRP + Polyketide  | 13%         |
| NRPS                                                                                                       | 4,197,325        | 4,245,835        | pyrronazol B       | NRP + Polyketide  | 9%          |
| <i>Serratia marcescens subsp. marcescens</i> ATCC 13880 chromosome, complete genome                        |                  |                  |                    |                   |             |
| NRPS                                                                                                       | 299,774          | 358,408          | vulnibactin        | NRP               | 12%         |
| NRPS-like                                                                                                  | 480,866          | 520,990          | -                  | -                 | -           |
| betalactone                                                                                                | 758,770          | 784,446          | -                  | -                 | -           |
| <b>prodigiosin</b>                                                                                         | <b>1,140,027</b> | <b>1,175,047</b> | <b>prodigiosin</b> | <b>Polyketide</b> | <b>100%</b> |
| thiopeptide                                                                                                | 1,768,028        | 1,794,461        | O-antigen          | Saccharide        | 14%         |
| NRPS-like,NRPS                                                                                             | 2,368,303        | 2,415,283        | microcin H47       | RiPP:Microcin     | 20%         |
| RRE-containing                                                                                             | 2,491,195        | 2,511,473        | lankacidin C       | NRP + Polyketide  | 20%         |
| NRPS                                                                                                       | 2,542,046        | 2,588,442        | pyrronazol B       | NRP + Polyketide  | 9%          |
| NRPS                                                                                                       | 4,575,382        | 4,619,182        | xantholipin        | Polyketide        | 4%          |
| <i>Serratia marcescens subsp. marcescens</i> ATCC 13880 substr. Sm_S13_jyu2015 chromosome, complete genome |                  |                  |                    |                   |             |
| NRPS                                                                                                       | 299,729          | 358,346          | vulnibactin        | NRP               | 12%         |
| NRPS-like                                                                                                  | 480,799          | 522,880          | -                  | -                 | -           |
| betalactone                                                                                                | 759,910          | 785,581          | -                  | -                 | -           |
| <b>prodigiosin</b>                                                                                         | <b>1,141,128</b> | <b>1,176,148</b> | <b>prodigiosin</b> | <b>Polyketide</b> | <b>100%</b> |
| thiopeptide                                                                                                | 1,769,229        | 1,795,673        | O-antigen          | Saccharide        | 14%         |
| NRPS                                                                                                       | 2,370,087        | 2,417,098        | microcin H47       | RiPP:Microcin     | 20%         |
| redox-cofactor                                                                                             | 2,492,004        | 2,514,166        | lankacidin C       | NRP + Polyketide  | 13%         |

|                                                                                                            |                  |                  |                    |                   |             |
|------------------------------------------------------------------------------------------------------------|------------------|------------------|--------------------|-------------------|-------------|
| NRPS                                                                                                       | 2,544,015        | 2,590,434        | pyrronazol B       | NRP + Polyketide  | 9%          |
| NRPS                                                                                                       | 4,578,309        | 4,622,247        | xantholipin        | Polyketide        | 4%          |
| <i>Serratia marcescens subsp. marcescens</i> ATCC 13880 substr. Sm_S22_jyu2015 chromosome, complete genome |                  |                  |                    |                   |             |
| NRPS                                                                                                       | 299,729          | 358,346          | vulnibactin        | NRP               | 12%         |
| NRPS-like                                                                                                  | 480,799          | 520,920          | -                  | -                 | -           |
| betalactone                                                                                                | 758,651          | 784,322          | -                  | -                 | -           |
| <b>prodigiosin</b>                                                                                         | <b>1,139,869</b> | <b>1,174,889</b> | <b>prodigiosin</b> | <b>Polyketide</b> | <b>100%</b> |
| thiopeptide                                                                                                | 1,767,991        | 1,794,435        | O-antigen          | Saccharide        | 14%         |
| NRPS                                                                                                       | 2,368,848        | 2,415,859        | microcin H47       | RiPP:Microcin     | 20%         |
| redox-cofactor                                                                                             | 2,490,765        | 2,512,927        | lankacidin C       | NRP + Polyketide  | 13%         |
| NRPS                                                                                                       | 2,542,776        | 2,589,195        | pyrronazol B       | NRP + Polyketide  | 9%          |
| NRPS                                                                                                       | 4,577,070        | 4,621,008        | xantholipin        | Polyketide        | 4%          |
| <i>Serratia marcescens subsp. marcescens</i> ATCC 13880 substr. Sm_S24_jyu2015 chromosome, complete genome |                  |                  |                    |                   |             |
| NRPS                                                                                                       | 299,728          | 358,345          | vulnibactin        | NRP               | 12%         |
| NRPS-like                                                                                                  | 480,798          | 522,879          | -                  | -                 | -           |
| betalactone                                                                                                | 759,909          | 785,580          | -                  | -                 | -           |
| <b>prodigiosin</b>                                                                                         | <b>1,141,127</b> | <b>1,176,147</b> | <b>prodigiosin</b> | <b>Polyketide</b> | <b>100%</b> |
| thiopeptide                                                                                                | 1,769,228        | 1,795,672        | O-antigen          | Saccharide        | 14%         |
| NRPS                                                                                                       | 2,370,085        | 2,417,096        | microcin H47       | RiPP:Microcin     | 20%         |
| redox-cofactor                                                                                             | 2,492,002        | 2,514,164        | lankacidin C       | NRP + Polyketide  | 13%         |
| NRPS                                                                                                       | 2,544,013        | 2,590,432        | pyrronazol B       | NRP + Polyketide  | 9%          |
| NRPS                                                                                                       | 4,578,307        | 4,622,245        | xantholipin        | Polyketide        | 4%          |
| <i>Serratia marcescens subsp. marcescens</i> ATCC 13880 substr. Sm_S28_jyu2015 chromosome, complete genome |                  |                  |                    |                   |             |
| NRPS                                                                                                       | 299,728          | 358,345          | vulnibactin        | NRP               | 12%         |
| NRPS-like                                                                                                  | 480,799          | 520,920          | -                  | -                 | -           |
| betalactone                                                                                                | 758,651          | 784,322          | -                  | -                 | -           |
| <b>prodigiosin</b>                                                                                         | <b>1,139,869</b> | <b>1,174,889</b> | <b>prodigiosin</b> | <b>Polyketide</b> | <b>100%</b> |
| thiopeptide                                                                                                | 1,767,970        | 1,794,414        | O-antigen          | Saccharide        | 14%         |
| NRPS                                                                                                       | 2,368,827        | 2,415,838        | microcin H47       | RiPP:Microcin     | 20%         |
| redox-cofactor                                                                                             | 2,490,744        | 2,512,906        | lankacidin C       | NRP + Polyketide  | 13%         |

|                                                                                                            |                  |                  |                    |                   |             |
|------------------------------------------------------------------------------------------------------------|------------------|------------------|--------------------|-------------------|-------------|
| NRPS                                                                                                       | 2,542,755        | 2,589,174        | pyrronazol B       | NRP + Polyketide  | 9%          |
| NRPS                                                                                                       | 4,577,049        | 4,620,987        | xantholipin        | Polyketide        | 4%          |
| <i>Serratia marcescens subsp. marcescens</i> ATCC 13880 substr. Sm_S33_jyu2015 chromosome, complete genome |                  |                  |                    |                   |             |
| NRPS                                                                                                       | 299,729          | 358,346          | vulnibactin        | NRP               | 12%         |
| NRPS-like                                                                                                  | 480,799          | 520,920          | -                  | -                 | -           |
| betalactone                                                                                                | 758,651          | 784,322          | -                  | -                 | -           |
| <b>prodigiosin</b>                                                                                         | <b>1,139,869</b> | <b>1,174,889</b> | <b>prodigiosin</b> | <b>Polyketide</b> | <b>100%</b> |
| thiopeptide                                                                                                | 1,767,971        | 1,794,415        | O-antigen          | Saccharide        | 14%         |
| NRPS                                                                                                       | 2,368,828        | 2,415,839        | microcin H47       | RiPP:Microcin     | 20%         |
| redox-cofactor                                                                                             | 2,490,745        | 2,512,907        | lankacidin C       | NRP + Polyketide  | 13%         |
| NRPS                                                                                                       | 2,542,756        | 2,589,175        | pyrronazol B       | NRP + Polyketide  | 9%          |
| NRPS                                                                                                       | 4,577,050        | 4,620,988        | xantholipin        | Polyketide        | 4%          |
| <i>Serratia marcescens subsp. marcescens</i> ATCC 13880 substr. Sm_S37_jyu2015 chromosome, complete genome |                  |                  |                    |                   |             |
| NRPS                                                                                                       | 299,728          | 358,345          | vulnibactin        | NRP               | 12%         |
| NRPS-like                                                                                                  | 480,798          | 520,919          | -                  | -                 | -           |
| betalactone                                                                                                | 758,650          | 784,321          | -                  | -                 | -           |
| <b>prodigiosin</b>                                                                                         | <b>1,139,868</b> | <b>1,174,888</b> | <b>prodigiosin</b> | <b>Polyketide</b> | <b>100%</b> |
| thiopeptide                                                                                                | 1,767,969        | 1,794,413        | O-antigen          | Saccharide        | 14%         |
| NRPS                                                                                                       | 2,368,826        | 2,415,837        | microcin H47       | RiPP:Microcin     | 20%         |
| redox-cofactor                                                                                             | 2,490,743        | 2,512,905        | lankacidin C       | NRP + Polyketide  | 13%         |
| NRPS                                                                                                       | 2,542,754        | 2,589,173        | pyrronazol B       | NRP + Polyketide  | 9%          |
| NRPS                                                                                                       | 4,577,039        | 4,620,977        | xantholipin        | Polyketide        | 4%          |
| <i>Serratia marcescens subsp. marcescens</i> ATCC 13880 substr. Sm_S57_jyu2015 chromosome, complete genome |                  |                  |                    |                   |             |
| NRPS                                                                                                       | 299,729          | 358,346          | vulnibactin        | NRP               | 12%         |
| NRPS-like                                                                                                  | 480,799          | 520,920          | -                  | -                 | -           |
| betalactone                                                                                                | 758,651          | 784,322          | -                  | -                 | -           |
| <b>prodigiosin</b>                                                                                         | <b>1,139,869</b> | <b>1,174,889</b> | <b>prodigiosin</b> | <b>Polyketide</b> | <b>100%</b> |
| thiopeptide                                                                                                | 1,767,970        | 1,794,414        | O-antigen          | Saccharide        | 14%         |
| NRPS                                                                                                       | 2,368,828        | 2,415,839        | microcin H47       | RiPP:Microcin     | 20%         |
| redox-cofactor                                                                                             | 2,490,745        | 2,512,907        | lankacidin C       | NRP + Polyketide  | 13%         |

|                                                                                                            |                  |                  |                    |                   |             |
|------------------------------------------------------------------------------------------------------------|------------------|------------------|--------------------|-------------------|-------------|
| NRPS                                                                                                       | 2,542,756        | 2,589,175        | pyrronazol B       | NRP + Polyketide  | 9%          |
| NRPS                                                                                                       | 4,577,050        | 4,620,988        | xantholipin        | Polyketide        | 4%          |
| <i>Serratia marcescens subsp. marcescens</i> ATCC 13880 substr. Sm_S60_jyu2015 chromosome, complete genome |                  |                  |                    |                   |             |
| NRPS                                                                                                       | 299,729          | 358,346          | vulnibactin        | NRP               | 12%         |
| NRPS-like                                                                                                  | 480,799          | 520,920          | -                  | -                 | -           |
| betalactone                                                                                                | 758,651          | 784,322          | -                  | -                 | -           |
| <b>prodigiosin</b>                                                                                         | <b>1,139,869</b> | <b>1,174,889</b> | <b>prodigiosin</b> | <b>Polyketide</b> | <b>100%</b> |
| thiopeptide                                                                                                | 1,769,249        | 1,795,693        | O-antigen          | Saccharide        | 14%         |
| NRPS                                                                                                       | 2,370,106        | 2,417,117        | microcin H47       | RiPP:Microcin     | 20%         |
| redox-cofactor                                                                                             | 2,492,023        | 2,514,185        | lankacidin C       | NRP + Polyketide  | 13%         |
| NRPS                                                                                                       | 2,544,034        | 2,590,453        | pyrronazol B       | NRP + Polyketide  | 9%          |
| NRPS                                                                                                       | 4,578,328        | 4,622,266        | xantholipin        | Polyketide        | 4%          |
| <i>Serratia marcescens subsp. marcescens</i> ATCC 13880 substr. Sm_S64_jyu2015 chromosome, complete genome |                  |                  |                    |                   |             |
| NRPS                                                                                                       | 299,729          | 358,346          | vulnibactin        | NRP               | 12%         |
| NRPS-like                                                                                                  | 480,799          | 520,920          | -                  | -                 | -           |
| betalactone                                                                                                | 758,651          | 784,322          | -                  | -                 | -           |
| <b>prodigiosin</b>                                                                                         | <b>1,139,869</b> | <b>1,174,889</b> | <b>prodigiosin</b> | <b>Polyketide</b> | <b>100%</b> |
| thiopeptide                                                                                                | 1,767,969        | 1,794,413        | O-antigen          | Saccharide        | 14%         |
| NRPS                                                                                                       | 2,368,825        | 2,415,836        | microcin H47       | RiPP:Microcin     | 20%         |
| redox-cofactor                                                                                             | 2,490,742        | 2,512,904        | lankacidin C       | NRP + Polyketide  | 13%         |
| NRPS                                                                                                       | 2,542,753        | 2,589,172        | pyrronazol B       | NRP + Polyketide  | 9%          |
| NRPS                                                                                                       | 4,577,047        | 4,620,985        | xantholipin        | Polyketide        | 4%          |
| <i>Serratia marcescens subsp. marcescens</i> ATCC 13880 substr. Sm_S65_jyu2015 chromosome, complete genome |                  |                  |                    |                   |             |
| NRPS                                                                                                       | 299,729          | 358,346          | vulnibactin        | NRP               | 12%         |
| NRPS-like                                                                                                  | 480,799          | 520,920          | -                  | -                 | -           |
| betalactone                                                                                                | 758,651          | 784,322          | -                  | -                 | -           |
| <b>prodigiosin</b>                                                                                         | <b>1,139,869</b> | <b>1,174,889</b> | <b>prodigiosin</b> | <b>Polyketide</b> | <b>100%</b> |
| thiopeptide                                                                                                | 1,767,970        | 1,794,414        | O-antigen          | Saccharide        | 14%         |
| NRPS                                                                                                       | 2,368,827        | 2,415,838        | microcin H47       | RiPP:Microcin     | 20%         |
| redox-cofactor                                                                                             | 2,490,744        | 2,512,906        | lankacidin C       | NRP + Polyketide  | 13%         |



|                                                                                                            |                  |                  |                    |                   |             |
|------------------------------------------------------------------------------------------------------------|------------------|------------------|--------------------|-------------------|-------------|
| NRPS                                                                                                       | 2,542,755        | 2,589,174        | pyrronazol B       | NRP + Polyketide  | 9%          |
| NRPS                                                                                                       | 4,577,049        | 4,620,987        | xantholipin        | Polyketide        | 4%          |
| <i>Serratia marcescens subsp. marcescens</i> ATCC 13880 substr. Sm_S67_jyu2015 chromosome, complete genome |                  |                  |                    |                   |             |
| NRPS                                                                                                       | 299,730          | 358,347          | vulnibactin        | NRP               | 12%         |
| NRPS-like                                                                                                  | 480,800          | 520,921          | -                  | -                 | -           |
| betalactone                                                                                                | 758,652          | 784,323          | -                  | -                 | -           |
| <b>prodigiosin</b>                                                                                         | <b>1,139,870</b> | <b>1,174,890</b> | <b>prodigiosin</b> | <b>Polyketide</b> | <b>100%</b> |
| thiopeptide                                                                                                | 1,767,971        | 1,794,415        | O-antigen          | Saccharide        | 14%         |
| NRPS                                                                                                       | 2,368,828        | 2,415,839        | microcin H47       | RiPP:Microcin     | 20%         |
| redox-cofactor                                                                                             | 2,490,745        | 2,512,907        | lankacidin C       | NRP + Polyketide  | 13%         |
| NRPS                                                                                                       | 2,542,756        | 2,589,175        | pyrronazol B       | NRP + Polyketide  | 9%          |
| NRPS                                                                                                       | 4,577,050        | 4,620,988        | xantholipin        | Polyketide        | 4%          |
| <i>Serratia marcescens</i> strain BP2 chromosome, complete genome                                          |                  |                  |                    |                   |             |
| NRPS                                                                                                       | 317,234          | 375,724          | vulnibactin        | NRP               | 18%         |
| betalactone                                                                                                | 794,673          | 820,343          | -                  | -                 | -           |
| redox-cofactor                                                                                             | 1,023,821        | 1,044,475        | lankacidin C       | NRP + Polyketide  | 13%         |
| <b>NRPS,prodigiosin</b>                                                                                    | <b>1,183,642</b> | <b>1,244,504</b> | <b>prodigiosin</b> | <b>Polyketide</b> | <b>100%</b> |
| thiopeptide                                                                                                | 1,825,954        | 1,852,398        | O-antigen          | Saccharide        | 14%         |
| redox-cofactor                                                                                             | 2,516,897        | 2,539,059        | lankacidin C       | NRP + Polyketide  | 13%         |
| NRPS                                                                                                       | 2,553,833        | 2,602,040        | pyrronazol B       | NRP + Polyketide  | 9%          |
| NRPS                                                                                                       | 3,237,153        | 3,280,921        | -                  | -                 | -           |
| arylpolyene                                                                                                | 4,549,763        | 4,593,359        | aryl polyenes      | Other             | 100%        |
| NRPS                                                                                                       | 4,600,446        | 4,644,384        | xantholipin        | Polyketide        | 4%          |
| <i>Serratia marcescens</i> strain BWH-23 chromosome, complete genome                                       |                  |                  |                    |                   |             |
| hserlactone                                                                                                | 488,965          | 509,657          | -                  | -                 | -           |
| betalactone                                                                                                | 692,180          | 717,848          | -                  | -                 | -           |
| thiopeptide                                                                                                | 1,666,597        | 1,693,040        | O-antigen          | Saccharide        | 14%         |
| NRPS                                                                                                       | 2,286,156        | 2,333,168        | microcin H47       | RiPP:Microcin     | 20%         |
| RRE-containing                                                                                             | 2,424,572        | 2,444,850        | lankacidin C       | NRP + Polyketide  | 13%         |
| NRPS                                                                                                       | 2,466,729        | 2,513,234        | pyrronazol B       | NRP + Polyketide  | 9%          |

|                                                                      |                  |                  |                                            |                   |             |
|----------------------------------------------------------------------|------------------|------------------|--------------------------------------------|-------------------|-------------|
| T1PKS,NRPS                                                           | 3,072,479        | 3,134,476        | althiomycin                                | NRP               | 100%        |
| NRPS                                                                 | 4,516,202        | 4,573,982        | rhizomide A / rhizomide B<br>/ rhizomide C | NRP               | 100%        |
| <i>Serratia marcescens</i> strain BWH-35 chromosome, complete genome |                  |                  |                                            |                   |             |
| NRPS                                                                 | 267,647          | 326,056          | turnerbactin                               | NRP               | 30%         |
| NRPS-like                                                            | 440,636          | 482,648          | -                                          | -                 | -           |
| betalactone                                                          | 685,071          | 710,741          | -                                          | -                 | -           |
| thiopeptide                                                          | 1,794,394        | 1,820,836        | O-antigen                                  | Saccharide        | 14%         |
| siderophore                                                          | 1,970,686        | 1,982,545        | -                                          | -                 | -           |
| redox-cofactor                                                       | 2,540,914        | 2,563,076        | lankacidin C                               | NRP + Polyketide  | 13%         |
| T1PKS,NRPS                                                           | 3,235,806        | 3,298,743        | althiomycin                                | NRP               | 100%        |
| NRPS                                                                 | 3,425,499        | 3,470,698        | -                                          | -                 | -           |
| NRPS                                                                 | 4,664,694        | 4,722,546        | rhizomide A / rhizomide B<br>/ rhizomide C | NRP               | 100%        |
| <i>Serratia marcescens</i> strain Byron chromosome, complete genome  |                  |                  |                                            |                   |             |
| redox-cofactor                                                       | 381,296          | 402,268          | -                                          | -                 | -           |
| NRPS                                                                 | 420,707          | 467,120          | pyrronazol B                               | NRP + Polyketide  | 9%          |
| NRPS                                                                 | 1,137,641        | 1,181,410        | -                                          | -                 | -           |
| NRPS                                                                 | 2,502,197        | 2,545,372        | xantholipin                                | Polyketide        | 4%          |
| NRPS                                                                 | 3,322,988        | 3,382,806        | vulnibactin                                | NRP               | 18%         |
| hserlactone                                                          | 3,556,360        | 3,577,052        | -                                          | -                 | -           |
| betalactone                                                          | 3,776,439        | 3,802,109        | -                                          | --                | -           |
| redox-cofactor                                                       | 3,999,108        | 4,021,270        | lankacidin C                               | NRP + Polyketide  | 13%         |
| <b>prodigiosin</b>                                                   | <b>4,173,842</b> | <b>4,208,862</b> | <b>prodigiosin</b>                         | <b>Polyketide</b> | <b>100%</b> |
| thiopeptide                                                          | 4,813,843        | 4,840,287        | O-antigen                                  | Saccharide        | 14%         |
| <i>Serratia marcescens</i> strain C110 chromosome, complete genome   |                  |                  |                                            |                   |             |
| NRPS                                                                 | 292,398          | 350,101          | vulnibactin                                | NRP               | 18%         |
| NRPS-like                                                            | 474,519          | 516,298          | -                                          | -                 | -           |
| betalactone                                                          | 772,672          | 798,341          | -                                          | -                 | -           |
| <b>NRPS</b>                                                          | <b>1,191,320</b> | <b>1,235,994</b> | <b>prodigiosin</b>                         | <b>Polyketide</b> | <b>12%</b>  |
| thiopeptide                                                          | 1,833,432        | 1,859,873        | O-antigen                                  | Saccharide        | 14%         |

|                                                                          |                  |                  |                                            |                               |             |
|--------------------------------------------------------------------------|------------------|------------------|--------------------------------------------|-------------------------------|-------------|
| NRPS                                                                     | 2,548,027        | 2,594,726        | colicin V                                  | RiPP                          | 1%          |
| RRE-containing                                                           | 2,679,397        | 2,699,675        | lankacidin C                               | NRP + Polyketide              | 13%         |
| NRPS                                                                     | 2,719,864        | 2,765,007        | pyrronazol B                               | NRP + Polyketide              | 9%          |
| NRPS                                                                     | 3,407,170        | 3,456,720        | lipopolysaccharide                         | Saccharide:Lipopolysaccharide | 5%          |
| NRPS                                                                     | 3,519,912        | 3,576,769        | gobichelin A / gobichelin B                | NRP                           | 11%         |
| RiPP-like                                                                | 3,918,458        | 3,931,004        | -                                          | -                             | -           |
| NRPS                                                                     | 4,829,833        | 4,887,685        | rhizomide A / rhizomide B<br>/ rhizomide C | NRP                           | 100%        |
| <i>Serratia marcescens</i> strain CM2012_028 chromosome, complete genome |                  |                  |                                            |                               |             |
| NRPS                                                                     | 296,036          | 354,916          | vulnibactin                                | NRP                           | 18%         |
| NRPS-like,hserlactone                                                    | 478,540          | 530,525          | -                                          | -                             | -           |
| betalactone                                                              | 722,031          | 747,701          | -                                          | -                             | -           |
| redox-cofactor                                                           | 924,975          | 946,345          | lankacidin C                               | NRP + Polyketide              | 13%         |
| <b>prodigiosin</b>                                                       | <b>1,108,577</b> | <b>1,143,597</b> | <b>prodigiosin</b>                         | <b>Polyketide</b>             | <b>100%</b> |
| thiopeptide                                                              | 1,745,599        | 1,772,043        | O-antigen                                  | Saccharide                    | 14%         |
| NRPS                                                                     | 2,314,745        | 2,360,618        | microcin H47                               | RiPP:Microcin                 | 20%         |
| redox-cofactor                                                           | 2,436,200        | 2,458,362        | lankacidin C                               | NRP + Polyketide              | 13%         |
| NRPS                                                                     | 2,486,711        | 2,533,972        | pyrronazol B                               | NRP + Polyketide              | 9%          |
| NRPS                                                                     | 4,501,602        | 4,545,537        | xantholipin                                | Polyketide                    | 4%          |
| <i>Serratia marcescens</i> strain E28 chromosome, complete genome        |                  |                  |                                            |                               |             |
| NRPS                                                                     | 283,349          | 342,070          | vulnibactin                                | NRP                           | 12%         |
| NRPS-like                                                                | 467,913          | 510,130          | -                                          | -                             | -           |
| betalactone                                                              | 713,591          | 739,261          | -                                          | -                             | -           |
| thiopeptide                                                              | 1,774,004        | 1,800,446        | O-antigen                                  | Saccharide                    | 14%         |
| NRPS                                                                     | 2,378,990        | 2,426,161        | colicin V                                  | RiPP                          | 1%          |
| redox-cofactor                                                           | 2,499,931        | 2,522,093        | lankacidin C                               | NRP + Polyketide              | 13%         |
| T1PKS,NRPS                                                               | 3,228,504        | 3,335,305        | althiomycin                                | NRP                           | 87%         |
| NRPS                                                                     | 4,854,739        | 4,912,591        | rhizomide A / rhizomide B<br>/ rhizomide C | NRP                           | 100%        |
| <i>Serratia marcescens</i> strain EL1 chromosome                         |                  |                  |                                            |                               |             |
| redox-cofactor                                                           | 517,325          | 538,384          | lankacidin C                               | NRP + Polyketide              | 13%         |

|                                                                          |                  |                  |                                         |                   |             |
|--------------------------------------------------------------------------|------------------|------------------|-----------------------------------------|-------------------|-------------|
| NRPS                                                                     | 558,246          | 604,763          | pyrronazol B                            | NRP + Polyketide  | 9%          |
| NRPS                                                                     | 1,250,939        | 1,294,693        | -                                       | -                 | -           |
| NRPS                                                                     | 2,636,589        | 2,679,765        | xantholipin                             | Polyketide        | 4%          |
| NRPS                                                                     | 3,481,117        | 3,540,958        | vulnibactin                             | NRP               | 18%         |
| betalactone                                                              | 3,930,125        | 3,955,795        | -                                       | -                 | -           |
| redox-cofactor                                                           | 4,126,334        | 4,148,496        | lankacidin C                            | NRP + Polyketide  | 13%         |
| <b>prodigiosin</b>                                                       | <b>4,301,062</b> | <b>4,336,082</b> | <b>prodigiosin</b>                      | <b>Polyketide</b> | <b>100%</b> |
| thiopeptide                                                              | 4,928,283        | 4,954,727        | O-antigen                               | Saccharide        | 14%         |
| <i>Serratia marcescens</i> strain ESE2014 chromosome, complete genome    |                  |                  |                                         |                   |             |
| NRPS                                                                     | 297,033          | 355,150          | vulnibactin                             | NRP               | 12%         |
| NRPS-like                                                                | 478,197          | 520,531          | -                                       | -                 | -           |
| betalactone                                                              | 723,420          | 749,089          | -                                       | -                 | -           |
| <b>prodigiosin</b>                                                       | <b>1,098,550</b> | <b>1,133,570</b> | <b>prodigiosin</b>                      | <b>Polyketide</b> | <b>100%</b> |
| thiopeptide                                                              | 1,720,096        | 1,746,540        | O-antigen                               | Saccharide        | 14%         |
| NRPS                                                                     | 2,335,218        | 2,382,230        | microcin H47                            | RiPP:Microcin     | 20%         |
| redox-cofactor                                                           | 2,456,818        | 2,478,980        | lankacidin C                            | NRP + Polyketide  | 13%         |
| NRPS                                                                     | 2,508,322        | 2,554,704        | pyrronazol B                            | NRP + Polyketide  | 9%          |
| NRPS                                                                     | 4,520,162        | 4,564,100        | xantholipin                             | Polyketide        | 4%          |
| <i>Serratia marcescens</i> strain SJC1058 genome assembly, chromosome: 1 |                  |                  |                                         |                   |             |
| T1PKS,NRPS                                                               | 1                | 44,141           | althiomycin                             | NRP               | 100%        |
| NRPS                                                                     | 109,836          | 154,929          | -                                       | -                 | -           |
| NRPS                                                                     | 220,189          | 266,246          | yersiniabactin                          | NRP + Polyketide  | 4%          |
| NRPS                                                                     | 1,595,548        | 1,653,111        | rhizomide A / rhizomide B / rhizomide C | NRP               | 100%        |
| NRPS                                                                     | 2,501,455        | 2,561,446        | vulnibactin                             | NRP               | 12%         |
| NRPS-like                                                                | 2,684,756        | 2,727,737        | -                                       | -                 | -           |
| RRE-containing                                                           | 2,734,486        | 2,749,147        | -                                       | -                 | -           |
| betalactone                                                              | 2,955,862        | 2,981,531        | -                                       | -                 | -           |
| thiopeptide                                                              | 4,008,799        | 4,035,242        | O-antigen                               | Saccharide        | 14%         |
| siderophore                                                              | 4,220,889        | 4,232,748        | -                                       | -                 | -           |

|                                                                          |           |           |                                            |                         |      |
|--------------------------------------------------------------------------|-----------|-----------|--------------------------------------------|-------------------------|------|
| redox-cofactor                                                           | 4,803,993 | 4,826,155 | lankacidin C                               | NRP + Polyketide        | 13%  |
| <i>Serratia marcescens</i> strain SJC1061 genome assembly, chromosome: 1 |           |           |                                            |                         |      |
| betalactone                                                              | 783,606   | 809,275   | -                                          | -                       | -    |
| RRE-containing                                                           | 1,015,990 | 1,030,651 | -                                          | -                       | -    |
| NRPS-like                                                                | 1,037,826 | 1,080,013 | -                                          | -                       | -    |
| NRPS                                                                     | 1,204,183 | 1,263,156 | vulnibactin                                | NRP                     | 12%  |
| NRPS                                                                     | 2,112,187 | 2,169,750 | rhizomide A / rhizomide B<br>/ rhizomide C | NRP                     | 100% |
| NRPS                                                                     | 3,499,014 | 3,545,071 | yersiniabactin                             | NRP + Polyketide        | 4%   |
| NRPS                                                                     | 3,610,331 | 3,655,424 | -                                          | -                       | -    |
| NRPS,T1PKS                                                               | 3,721,010 | 3,784,186 | althiomycin                                | NRP                     | 100% |
| redox-cofactor                                                           | 4,418,418 | 4,440,580 | lankacidin C                               | NRP + Polyketide        | 13%  |
| siderophore                                                              | 5,011,991 | 5,023,850 | -                                          | -                       | -    |
| thiopeptide                                                              | 5,209,496 | 5,235,939 | O-antigen                                  | Saccharide              | 14%  |
| <i>Serratia marcescens</i> strain SJC1062 genome assembly, chromosome: 1 |           |           |                                            |                         |      |
| T1PKS,NRPS                                                               | 1         | 44,104    | althiomycin                                | NRP                     | 100% |
| NRPS                                                                     | 109,799   | 154,892   | -                                          | -                       | -    |
| NRPS                                                                     | 220,152   | 266,209   | yersiniabactin                             | NRP + Polyketide        | 4%   |
| NRPS                                                                     | 1,597,119 | 1,653,075 | xenoamicin A / xenoamicin<br>B             | NRP:Cyclic depsipeptide | 20%  |
| NRPS                                                                     | 2,501,419 | 2,561,410 | vulnibactin                                | NRP                     | 12%  |
| NRPS-like                                                                | 2,684,720 | 2,727,701 | -                                          | -                       | -    |
| RRE-containing                                                           | 2,734,450 | 2,749,111 | -                                          | -                       | -    |
| betalactone                                                              | 2,955,826 | 2,981,495 | -                                          | -                       | -    |
| thiopeptide                                                              | 4,008,768 | 4,035,211 | O-antigen                                  | Saccharide              | 14%  |
| siderophore                                                              | 4,220,858 | 4,232,717 | -                                          | -                       | -    |
| redox-cofactor                                                           | 4,804,126 | 4,826,288 | lankacidin C                               | NRP + Polyketide        | 13%  |
| <i>Serratia marcescens</i> strain SJC1070 genome assembly, chromosome: 1 |           |           |                                            |                         |      |
| T1PKS,NRPS                                                               | 1         | 44,120    | althiomycin                                | NRP                     | 100% |
| NRPS                                                                     | 109,815   | 154,908   | -                                          | -                       | -    |
| NRPS                                                                     | 220,168   | 266,225   | yersiniabactin                             | NRP + Polyketide        | 4%   |

|                                                                          |                  |                  |                                            |                   |            |
|--------------------------------------------------------------------------|------------------|------------------|--------------------------------------------|-------------------|------------|
| NRPS                                                                     | 1,595,597        | 1,653,160        | rhizomide A / rhizomide B<br>/ rhizomide C | NRP               | 100%       |
| NRPS                                                                     | 2,501,504        | 2,561,495        | vulnibactin                                | NRP               | 12%        |
| NRPS-like                                                                | 2,684,805        | 2,727,786        | -                                          | -                 | -          |
| RRE-containing                                                           | 2,734,535        | 2,749,196        | -                                          | -                 | -          |
| betalactone                                                              | 2,955,911        | 2,981,580        | -                                          | -                 | -          |
| thiopeptide                                                              | 4,008,853        | 4,035,296        | O-antigen                                  | Saccharide        | 14%        |
| siderophore                                                              | 4,220,943        | 4,232,802        | -                                          | -                 | -          |
| redox-cofactor                                                           | 4,804,214        | 4,826,376        | lankacidin C                               | NRP + Polyketide  | 13%        |
| <i>Serratia marcescens</i> strain SJC1039 genome assembly, chromosome: 1 |                  |                  |                                            |                   |            |
| thiopeptide                                                              | 254,427          | 280,868          | O-antigen                                  | Saccharide        | 14%        |
| NRPS                                                                     | 823,613          | 870,322          | colicin V                                  | RiPP              | 1%         |
| RRE-containing                                                           | 938,792          | 959,070          | lankacidin C                               | NRP + Polyketide  | 13%        |
| NRPS                                                                     | 977,344          | 1,023,806        | turnerbactin                               | NRP               | 15%        |
| NRPS                                                                     | 1,638,664        | 1,687,777        | -                                          | -                 | -          |
| NRPS                                                                     | 2,992,156        | 3,049,002        | rhizomide A / rhizomide B<br>/ rhizomide C | NRP               | 100%       |
| NRPS,T1PKS                                                               | 3,271,856        | 3,326,021        | -                                          | -                 | -          |
| NRPS                                                                     | 3,836,196        | 3,894,716        | vulnibactin                                | NRP               | 18%        |
| NRPS-like                                                                | 4,008,260        | 4,050,681        | -                                          | -                 | -          |
| betalactone                                                              | 4,282,738        | 4,308,407        | -                                          | -                 | -          |
| <b>NRPS</b>                                                              | <b>4,649,548</b> | <b>4,695,256</b> | <b>prodigiosin</b>                         | <b>Polyketide</b> | <b>12%</b> |
| <i>Serratia marcescens</i> strain SJC1043 genome assembly, chromosome: 1 |                  |                  |                                            |                   |            |
| NRPS                                                                     | 291,794          | 351,526          | vulnibactin                                | NRP               | 12%        |
| NRPS-like                                                                | 475,241          | 517,428          | -                                          | -                 | -          |
| RRE-containing                                                           | 524,603          | 539,264          | -                                          | -                 | -          |
| betalactone                                                              | 745,983          | 771,652          | -                                          | -                 | -          |
| thiopeptide                                                              | 1,842,231        | 1,868,674        | O-antigen                                  | Saccharide        | 14%        |
| siderophore                                                              | 2,054,320        | 2,066,179        | -                                          | -                 | -          |
| redox-cofactor                                                           | 2,592,522        | 2,614,684        | lankacidin C                               | NRP + Polyketide  | 13%        |
| T1PKS,NRPS                                                               | 3,247,736        | 3,310,803        | althiomycin                                | NRP               | 100%       |

|                                                                          |           |           |                                            |                         |      |
|--------------------------------------------------------------------------|-----------|-----------|--------------------------------------------|-------------------------|------|
| NRPS                                                                     | 3,376,498 | 3,421,591 | -                                          | -                       | -    |
| NRPS                                                                     | 3,486,851 | 3,532,908 | yersiniabactin                             | NRP + Polyketide        | 4%   |
| NRPS                                                                     | 4,820,546 | 4,875,176 | rhizomide A / rhizomide B<br>/ rhizomide C | NRP                     | 100% |
| <i>Serratia marcescens</i> strain SJC1044 genome assembly, chromosome: 1 |           |           |                                            |                         |      |
| thiopeptide                                                              | 249,745   | 276,188   | O-antigen                                  | Saccharide              | 14%  |
| siderophore                                                              | 461,835   | 473,694   | -                                          | -                       | -    |
| redox-cofactor                                                           | 1,000,037 | 1,022,199 | lankacidin C                               | NRP + Polyketide        | 13%  |
| T1PKS,NRPS                                                               | 1,655,251 | 1,718,318 | althiomycin                                | NRP                     | 100% |
| NRPS                                                                     | 1,784,013 | 1,829,106 | -                                          | -                       | -    |
| NRPS                                                                     | 1,894,366 | 1,940,423 | yersiniabactin                             | NRP + Polyketide        | 4%   |
| NRPS                                                                     | 3,229,611 | 3,282,345 | orfamide A / orfamide C                    | NRP:Cyclic depsipeptide | 17%  |
| NRPS                                                                     | 4,131,882 | 4,191,873 | vulnibactin                                | NRP                     | 12%  |
| NRPS-like                                                                | 4,315,183 | 4,358,164 | -                                          | -                       | -    |
| RRE-containing                                                           | 4,362,811 | 4,383,077 | -                                          | -                       | -    |
| betalactone                                                              | 4,586,293 | 4,611,962 | -                                          | -                       | -    |
| <i>Serratia marcescens</i> strain SJC1045 genome assembly, chromosome: 1 |           |           |                                            |                         |      |
| thiopeptide                                                              | 249,682   | 276,125   | O-antigen                                  | Saccharide              | 14%  |
| siderophore                                                              | 461,772   | 473,631   | -                                          | -                       | -    |
| redox-cofactor                                                           | 999,974   | 1,022,136 | lankacidin C                               | NRP + Polyketide        | 13%  |
| T1PKS,NRPS                                                               | 1,655,221 | 1,718,288 | althiomycin                                | NRP                     | 100% |
| NRPS                                                                     | 1,783,983 | 1,829,076 | -                                          | -                       | -    |
| NRPS                                                                     | 1,894,336 | 1,940,393 | yersiniabactin                             | NRP + Polyketide        | 4%   |
| NRPS                                                                     | 3,228,025 | 3,282,366 | rhizomide A / rhizomide B<br>/ rhizomide C | NRP                     | 100% |
| NRPS                                                                     | 4,131,903 | 4,191,894 | vulnibactin                                | NRP                     | 12%  |
| NRPS-like                                                                | 4,315,204 | 4,358,185 | -                                          | -                       | -    |
| RRE-containing                                                           | 4,362,832 | 4,383,098 | -                                          | -                       | -    |
| betalactone                                                              | 4,586,314 | 4,611,983 | -                                          | -                       | -    |
| <i>Serratia marcescens</i> strain SJC1046 genome assembly, chromosome: 1 |           |           |                                            |                         |      |
| redox-cofactor                                                           | 653,517   | 675,679   | lankacidin C                               | NRP + Polyketide        | 13%  |

|                                                                                                            |                  |                  |                                            |                   |             |
|------------------------------------------------------------------------------------------------------------|------------------|------------------|--------------------------------------------|-------------------|-------------|
| siderophore                                                                                                | 1,244,161        | 1,256,020        | -                                          |                   |             |
| thiopeptide                                                                                                | 1,441,667        | 1,468,110        | O-antigen                                  | Saccharide        | 14%         |
| betalactone                                                                                                | 2,499,957        | 2,525,626        | -                                          | -                 | -           |
| RRE-containing                                                                                             | 2,728,838        | 2,749,104        | -                                          | -                 | -           |
| NRPS-like                                                                                                  | 2,754,177        | 2,796,364        | -                                          | -                 | -           |
| NRPS                                                                                                       | 2,920,079        | 2,979,346        | vulnibactin                                | NRP               | 12%         |
| NRPS                                                                                                       | 3,821,868        | 3,879,431        | rhizomide A / rhizomide B<br>/ rhizomide C | NRP               | 100%        |
| NRPS                                                                                                       | 5,210,183        | 5,256,240        | yersiniabactin                             | NRP + Polyketide  | 4%          |
| NRPS                                                                                                       | 5,321,500        | 5,366,593        | -                                          | -                 | --          |
| NRPS,T1PKS                                                                                                 | 5,432,179        | 5,476,370        | althiomycin                                | NRP               | 100%        |
| <i>Serratia marcescens subsp. marcescens</i> ATCC 13880 substr. Sm_S68_jyu2015 chromosome, complete genome |                  |                  |                                            |                   |             |
| NRPS                                                                                                       | 299,728          | 358,345          | vulnibactin                                | NRP               | 12%         |
| NRPS-like                                                                                                  | 480,798          | 520,919          | -                                          | -                 | -           |
| betalactone                                                                                                | 758,650          | 784,321          | -                                          | -                 | -           |
| <b>prodigiosin</b>                                                                                         | <b>1,139,868</b> | <b>1,174,888</b> | <b>prodigiosin</b>                         | <b>Polyketide</b> | <b>100%</b> |
| thiopeptide                                                                                                | 1,767,970        | 1,794,414        | O-antigen                                  | Saccharide        | 14%         |
| NRPS                                                                                                       | 2,368,827        | 2,415,838        | microcin H47                               | RiPP:Microcin     | 20%         |
| redox-cofactor                                                                                             | 2,490,744        | 2,512,906        | lankacidin C                               | NRP + Polyketide  | 13%         |
| NRPS                                                                                                       | 2,542,755        | 2,589,174        | pyrronazol B                               | NRP + Polyketide  | 9%          |
| NRPS                                                                                                       | 4,577,049        | 4,620,987        | xantholipin                                | Polyketide        | 4%          |
| <i>Serratia marcescens subsp. marcescens</i> ATCC 13880 substr. Sm_S6_jyu2015 chromosome, complete genome  |                  |                  |                                            |                   |             |
| NRPS                                                                                                       | 299,729          | 358,346          | vulnibactin                                | NRP               | 12%         |
| NRPS-like                                                                                                  | 480,799          | 520,920          | -                                          | -                 | -           |
| betalactone                                                                                                | 758,651          | 784,322          | -                                          | -                 | -           |
| <b>prodigiosin</b>                                                                                         | <b>1,139,869</b> | <b>1,174,889</b> | <b>prodigiosin</b>                         | <b>Polyketide</b> | <b>100%</b> |
| thiopeptide                                                                                                | 1,767,971        | 1,794,415        | O-antigen                                  | Saccharide        | 14%         |
| NRPS                                                                                                       | 2,368,828        | 2,415,839        | microcin H47                               | RiPP:Microcin     | 20%         |



|                                                                                                            |                  |                  |                    |                   |             |
|------------------------------------------------------------------------------------------------------------|------------------|------------------|--------------------|-------------------|-------------|
| redox-cofactor                                                                                             | 2,490,745        | 2,512,907        | lankacidin C       | NRP + Polyketide  | 13%         |
| NRPS                                                                                                       | 2,542,756        | 2,589,175        | pyrronazol B       | NRP + Polyketide  | 9%          |
| NRPS                                                                                                       | 4,577,050        | 4,620,988        | xantholipin        | Polyketide        | 4%          |
| <i>Serratia marcescens subsp. marcescens</i> ATCC 13880 substr. Sm_S71_jyu2015 chromosome, complete genome |                  |                  |                    |                   |             |
| NRPS                                                                                                       | 299,729          | 358,346          | vulnibactin        | NRP               | 12%         |
| NRPS-like                                                                                                  | 480,799          | 520,920          | -                  | -                 | -           |
| betalactone                                                                                                | 758,651          | 784,322          | -                  | -                 | -           |
| <b>prodigiosin</b>                                                                                         | <b>1,139,869</b> | <b>1,174,889</b> | <b>prodigiosin</b> | <b>Polyketide</b> | <b>100%</b> |
| thiopeptide                                                                                                | 1,767,991        | 1,794,435        | O-antigen          | Saccharide        | 14%         |
| NRPS                                                                                                       | 2,368,848        | 2,415,859        | microcin H47       | RiPP:Microcin     | 20%         |
| redox-cofactor                                                                                             | 2,490,765        | 2,512,927        | lankacidin C       | NRP + Polyketide  | 13%         |
| NRPS                                                                                                       | 2,542,776        | 2,589,195        | pyrronazol B       | NRP + Polyketide  | 9%          |
| NRPS                                                                                                       | 4,577,070        | 4,621,008        | xantholipin        | Polyketide        | 4%          |
| <i>Serratia marcescens subsp. marcescens</i> ATCC 13880 substr. Sm_S78_jyu2015 chromosome, complete genome |                  |                  |                    |                   |             |
| NRPS                                                                                                       | 299,730          | 358,347          | vulnibactin        | NRP               | 12%         |
| NRPS-like                                                                                                  | 480,800          | 520,921          | -                  | -                 | -           |
| betalactone                                                                                                | 758,653          | 784,325          | -                  | -                 | -           |
| <b>prodigiosin</b>                                                                                         | <b>1,139,872</b> | <b>1,174,892</b> | <b>prodigiosin</b> | <b>Polyketide</b> | <b>100%</b> |
| thiopeptide                                                                                                | 1,767,952        | 1,794,396        | O-antigen          | Saccharide        | 14%         |
| NRPS                                                                                                       | 2,368,809        | 2,415,821        | microcin E492      | RiPP:Microcin     | 18%         |
| redox-cofactor                                                                                             | 2,490,727        | 2,512,889        | lankacidin C       | NRP + Polyketide  | 13%         |
| NRPS                                                                                                       | 2,542,738        | 2,589,157        | pyrronazol B       | NRP + Polyketide  | 9%          |
| NRPS                                                                                                       | 4,577,032        | 4,620,970        | xantholipin        | Polyketide        | 4%          |
| <i>Serratia marcescens subsp. marcescens</i> ATCC 13880 substr. Sm_S79_jyu2015 chromosome, complete genome |                  |                  |                    |                   |             |
| NRPS                                                                                                       | 299,728          | 358,345          | vulnibactin        | NRP               | 12%         |
| NRPS-like                                                                                                  | 480,798          | 522,879          | -                  | -                 | -           |
| betalactone                                                                                                | 759,909          | 785,580          | -                  | -                 | -           |

|                                                                                                            |                  |                  |                    |                   |             |
|------------------------------------------------------------------------------------------------------------|------------------|------------------|--------------------|-------------------|-------------|
| <b>prodigiosin</b>                                                                                         | <b>1,141,127</b> | <b>1,176,147</b> | <b>prodigiosin</b> | <b>Polyketide</b> | <b>100%</b> |
| thiopeptide                                                                                                | 1,769,207        | 1,795,651        | O-antigen          | Saccharide        | 14%         |
| NRPS                                                                                                       | 2,370,064        | 2,417,075        | microcin H47       | RiPP:Microcin     | 20%         |
| redox-cofactor                                                                                             | 2,491,981        | 2,514,143        | lankacidin C       | NRP + Polyketide  | 13%         |
| NRPS                                                                                                       | 2,543,992        | 2,590,411        | pyrronazol B       | NRP + Polyketide  | 9%          |
| NRPS                                                                                                       | 4,578,286        | 4,622,224        | xantholipin        | Polyketide        | 4%          |
| <i>Serratia marcescens subsp. marcescens</i> ATCC 13880 substr. Sm_S81_jyu2015 chromosome, complete genome |                  |                  |                    |                   |             |
| NRPS                                                                                                       | 299,729          | 358,346          | vulnibactin        | NRP               | 12%         |
| NRPS-like                                                                                                  | 480,799          | 520,920          | -                  | -                 | -           |
| betalactone                                                                                                | 758,651          | 784,322          | -                  | -                 | -           |
| <b>prodigiosin</b>                                                                                         | <b>1,139,870</b> | <b>1,174,890</b> | <b>prodigiosin</b> | <b>Polyketide</b> | <b>100%</b> |
| thiopeptide                                                                                                | 1,767,972        | 1,794,416        | O-antigen          | Saccharide        | 14%         |
| NRPS                                                                                                       | 2,368,829        | 2,415,840        | microcin H47       | RiPP:Microcin     | 20%         |
| redox-cofactor                                                                                             | 2,490,746        | 2,512,908        | lankacidin C       | NRP + Polyketide  | 13%         |
| NRPS                                                                                                       | 2,542,757        | 2,589,176        | pyrronazol B       | NRP + Polyketide  | 9%          |
| NRPS                                                                                                       | 4,577,051        | 4,620,989        | xantholipin        | Polyketide        | 4%          |
| <i>Serratia marcescens subsp. marcescens</i> ATCC 13880 substr. Sm_S89_jyu2015 chromosome, complete genome |                  |                  |                    |                   |             |
| NRPS                                                                                                       | 299,729          | 358,346          | vulnibactin        | NRP               | 12%         |
| NRPS-like                                                                                                  | 480,799          | 520,920          | -                  | -                 | -           |
| betalactone                                                                                                | 758,651          | 784,322          | -                  | -                 | -           |
| <b>prodigiosin</b>                                                                                         | <b>1,139,870</b> | <b>1,174,890</b> | <b>prodigiosin</b> | <b>Polyketide</b> | <b>100%</b> |
| thiopeptide                                                                                                | 1,767,971        | 1,794,415        | O-antigen          | Saccharide        | 14%         |
| NRPS                                                                                                       | 2,368,828        | 2,415,839        | microcin H47       | RiPP:Microcin     | 20%         |
| redox-cofactor                                                                                             | 2,490,745        | 2,512,907        | lankacidin C       | NRP + Polyketide  | 13%         |
| NRPS                                                                                                       | 2,542,756        | 2,589,175        | pyrronazol B       | NRP + Polyketide  | 9%          |
| NRPS                                                                                                       | 4,577,050        | 4,620,988        | xantholipin        | Polyketide        | 4%          |
| <i>Serratia marcescens subsp. marcescens</i> ATCC 13880 substr. Sm_S94_jyu2015 chromosome, complete genome |                  |                  |                    |                   |             |

|                                                                                                            |                  |                  |                    |                   |             |
|------------------------------------------------------------------------------------------------------------|------------------|------------------|--------------------|-------------------|-------------|
| NRPS                                                                                                       | 299,729          | 358,346          | vulnibactin        | NRP               | 12%         |
| NRPS-like                                                                                                  | 480,799          | 520,920          | -                  | -                 | -           |
| betalactone                                                                                                | 758,651          | 784,322          | -                  | -                 | -           |
| <b>prodigiosin</b>                                                                                         | <b>1,139,869</b> | <b>1,174,889</b> | <b>prodigiosin</b> | <b>Polyketide</b> | <b>100%</b> |
| thiopeptide                                                                                                | 1,767,979        | 1,794,423        | O-antigen          | Saccharide        | 14%         |
| NRPS                                                                                                       | 2,368,836        | 2,415,847        | microcin H47       | RiPP:Microcin     | 20%         |
| redox-cofactor                                                                                             | 2,490,753        | 2,512,915        | lankacidin C       | NRP + Polyketide  | 13%         |
| NRPS                                                                                                       | 2,542,764        | 2,589,183        | pyrronazol B       | NRP + Polyketide  | 9%          |
| NRPS                                                                                                       | 4,577,058        | 4,620,996        | xantholipin        | Polyketide        | 4%          |
| <i>Serratia marcescens subsp. marcescens</i> ATCC 13880 substr. Sm_S95_jyu2015 chromosome, complete genome |                  |                  |                    |                   |             |
| NRPS                                                                                                       | 299,729          | 358,346          | vulnibactin        | NRP               | 12%         |
| NRPS-like                                                                                                  | 482,058          | 522,179          | -                  | -                 | -           |
| betalactone                                                                                                | 759,910          | 785,581          | -                  | -                 | -           |
| <b>prodigiosin</b>                                                                                         | <b>1,141,128</b> | <b>1,176,148</b> | <b>prodigiosin</b> | <b>Polyketide</b> | <b>100%</b> |
| thiopeptide                                                                                                | 1,769,250        | 1,795,694        | O-antigen          | Saccharide        | 14%         |
| NRPS                                                                                                       | 2,370,107        | 2,417,118        | microcin H47       | RiPP:Microcin     | 20%         |
| redox-cofactor                                                                                             | 2,492,024        | 2,514,186        | lankacidin C       | NRP + Polyketide  | 13%         |
| NRPS                                                                                                       | 2,544,035        | 2,590,454        | pyrronazol B       | NRP + Polyketide  | 9%          |
| NRPS                                                                                                       | 4,578,329        | 4,622,267        | xantholipin        | Polyketide        | 4%          |
| <i>Serratia marcescens subsp. marcescens</i> ATCC 13880 substr. Sm_S96_jyu2015 chromosome, complete genome |                  |                  |                    |                   |             |
| NRPS                                                                                                       | 299,730          | 358,347          | vulnibactin        | NRP               | 12%         |
| NRPS-like                                                                                                  | 480,800          | 520,921          | -                  | -                 | -           |
| betalactone                                                                                                | 758,652          | 784,323          | -                  | -                 | -           |
| <b>prodigiosin</b>                                                                                         | <b>1,139,870</b> | <b>1,174,890</b> | <b>prodigiosin</b> | <b>Polyketide</b> | <b>100%</b> |
| thiopeptide                                                                                                | 1,767,971        | 1,794,415        | O-antigen          | Saccharide        | 14%         |
| NRPS                                                                                                       | 2,368,828        | 2,415,839        | microcin H47       | RiPP:Microcin     | 20%         |
| redox-cofactor                                                                                             | 2,490,745        | 2,512,907        | lankacidin C       | NRP + Polyketide  | 13%         |

|                                                                         |                  |                  |                    |                   |             |
|-------------------------------------------------------------------------|------------------|------------------|--------------------|-------------------|-------------|
| NRPS                                                                    | 2,542,756        | 2,589,175        | pyrronazol B       | NRP + Polyketide  | 9%          |
| NRPS                                                                    | 4,577,050        | 4,620,988        | xantholipin        | Polyketide        | 4%          |
| <i>Serratia marcescens</i> strain SCH909 chromosome, complete genome    |                  |                  |                    |                   |             |
| NRPS,T1PKS                                                              | 273,948          | 359,632          | vulnibactin        | NRP               | 12%         |
| NRPS-like                                                               | 473,624          | 515,317          | -                  | -                 | -           |
| betalactone                                                             | 735,092          | 760,761          | -                  | -                 | -           |
| thiopeptide                                                             | 1,902,742        | 1,929,183        | O-antigen          | Saccharide        | 14%         |
| RRE-containing                                                          | 2,616,697        | 2,636,975        | lankacidin C       | NRP + Polyketide  | 13%         |
| NRPS                                                                    | 2,651,856        | 2,698,162        | -                  | -                 | -           |
| NRPS                                                                    | 3,347,252        | 3,397,034        | -                  | -                 | -           |
| NRPS                                                                    | 4,733,280        | 4,791,132        | xenotetrapeptide   | NRP               | 100%        |
| <i>Serratia marcescens</i> strain SCQ1 chromosome, complete genome      |                  |                  |                    |                   |             |
| NRPS                                                                    | 821,856          | 865,151          | xantholipin        | Polyketide        | 4%          |
| NRPS                                                                    | 1,637,989        | 1,696,809        | vulnibactin        | NRP               | 18%         |
| NRPS-like                                                               | 1,820,133        | 1,861,342        | -                  | -                 | -           |
| betalactone                                                             | 2,063,158        | 2,088,830        | -                  | -                 | -           |
| <b>prodigiosin</b>                                                      | <b>2,434,448</b> | <b>2,469,468</b> | <b>prodigiosin</b> | <b>Polyketide</b> | <b>100%</b> |
| thiopeptide                                                             | 3,055,132        | 3,081,576        | O-antigen          | Saccharide        | 14%         |
| NRPS                                                                    | 3,631,603        | 3,677,389        | microcin H47       | RiPP:Microcin     | 20%         |
| RRE-containing                                                          | 3,756,132        | 3,776,410        | lankacidin C       | NRP + Polyketide  | 13%         |
| NRPS                                                                    | 3,805,939        | 3,854,449        | pyrronazol B       | NRP + Polyketide  | 9%          |
| <i>Serratia marcescens</i> strain SGAir0764 chromosome, complete genome |                  |                  |                    |                   |             |
| NRPS                                                                    | 271,596          | 330,471          | vulnibactin        | NRP               | 18%         |
| NRPS-like                                                               | 566,069          | 607,775          | -                  | -                 | -           |
| betalactone                                                             | 805,220          | 830,890          | -                  | -                 | -           |
| <b>prodigiosin</b>                                                      | <b>1,159,270</b> | <b>1,194,290</b> | <b>prodigiosin</b> | <b>Polyketide</b> | <b>100%</b> |
| thiopeptide                                                             | 1,763,450        | 1,789,894        | O-antigen          | Saccharide        | 14%         |

|                                                                       |                  |                  |                                            |                               |             |
|-----------------------------------------------------------------------|------------------|------------------|--------------------------------------------|-------------------------------|-------------|
| NRPS                                                                  | 2,348,426        | 2,392,145        | microcin H47                               | RiPP:Microcin                 | 20%         |
| redox-cofactor                                                        | 2,469,253        | 2,491,415        | lankacidin C                               | NRP + Polyketide              | 13%         |
| NRPS                                                                  | 2,516,490        | 2,562,713        | pyrronazol B                               | NRP + Polyketide              | 9%          |
| NRPS                                                                  | 4,574,971        | 4,618,909        | xantholipin                                | Polyketide                    | 4%          |
| RiPP-like                                                             | 4,929,853        | 4,942,384        | -                                          | -                             | -           |
| <i>Serratia marcescens</i> strain SMBC50 chromosome, complete genome  |                  |                  |                                            |                               |             |
| NRPS                                                                  | 267,723          | 325,426          | vulnibactin                                | NRP                           | 18%         |
| NRPS-like                                                             | 449,844          | 491,623          | -                                          | -                             | -           |
| betalactone                                                           | 747,997          | 773,666          | -                                          | -                             | -           |
| <b>NRPS</b>                                                           | <b>1,166,644</b> | <b>1,211,318</b> | <b>prodigiosin</b>                         | <b>Polyketide</b>             | <b>12%</b>  |
| thiopeptide                                                           | 1,808,511        | 1,834,952        | O-antigen                                  | Saccharide                    | 14%         |
| NRPS                                                                  | 2,558,492        | 2,605,191        | colicin V                                  | RiPP                          | 1%          |
| RRE-containing                                                        | 2,689,862        | 2,710,140        | lankacidin C                               | NRP + Polyketide              | 13%         |
| NRPS                                                                  | 2,730,329        | 2,775,472        | pyrronazol B                               | NRP + Polyketide              | 9%          |
| NRPS                                                                  | 3,452,973        | 3,502,523        | lipopolysaccharide                         | Saccharide:Lipopolysaccharide | 5%          |
| NRPS                                                                  | 3,565,715        | 3,622,572        | gobichelin A /<br>gobichelin B             | NRP                           | 11%         |
| RiPP-like                                                             | 3,962,059        | 3,974,605        | -                                          | -                             | -           |
| NRPS                                                                  | 4,570,125        | 4,627,977        | rhizomide A / rhizomide<br>B / rhizomide C | NRP                           | 100%        |
| <i>Serratia marcescens</i> strain SMNSF-1 chromosome, complete genome |                  |                  |                                            |                               |             |
| NRPS                                                                  | 298,033          | 356,999          | vulnibactin                                | NRP                           | 18%         |
| NRPS-like                                                             | 485,301          | 524,943          | -                                          | -                             | -           |
| betalactone                                                           | 783,151          | 808,821          | -                                          | -                             | -           |
| <b>prodigiosin</b>                                                    | <b>1,164,832</b> | <b>1,199,858</b> | <b>prodigiosin</b>                         | <b>Polyketide</b>             | <b>100%</b> |
| thiopeptide                                                           | 1,768,432        | 1,794,876        | O-antigen                                  | Saccharide                    | 14%         |
| NRPS                                                                  | 2,379,367        | 2,425,790        | microcin H47                               | RiPP:Microcin                 | 20%         |

|                                                                           |                  |                  |                                         |                   |             |
|---------------------------------------------------------------------------|------------------|------------------|-----------------------------------------|-------------------|-------------|
| redox-cofactor                                                            | 2,499,844        | 2,522,006        | lankacidin C                            | NRP + Polyketide  | 13%         |
| NRPS                                                                      | 2,549,550        | 2,598,060        | pyrronazol B                            | NRP + Polyketide  | 9%          |
| <i>Serratia marcescens</i> strain SmUNAM836 chromosome, complete sequence |                  |                  |                                         |                   |             |
| betalactone                                                               | 61,653           | 87,322           | -                                       | -                 | -           |
| <b>NRPS</b>                                                               | <b>429,252</b>   | <b>473,901</b>   | <b>prodigiosin</b>                      | <b>Polyketide</b> | <b>12%</b>  |
| thiopeptide                                                               | 1,118,087        | 1,144,529        | O-antigen                               | Saccharide        | 14%         |
| NRPS                                                                      | 1,734,087        | 1,780,797        | colicin V                               | RiPP              | 1%          |
| RRE-containing                                                            | 1,869,032        | 1,889,310        | lankacidin C                            | NRP + Polyketide  | 13%         |
| NRPS                                                                      | 1,903,877        | 1,950,692        | -                                       | -                 | -           |
| NRPS                                                                      | 2,614,272        | 2,663,290        | -                                       | -                 | -           |
| NRPS                                                                      | 3,981,217        | 4,038,065        | rhizomide A / rhizomide B / rhizomide C | NRP               | 100%        |
| NRPS                                                                      | 4,802,707        | 4,862,536        | vulnibactin                             | NRP               | 18%         |
| NRPS-like,hserlactone                                                     | 4,973,901        | 5,026,128        | -                                       | -                 | -           |
| <i>Serratia marcescens</i> strain Sys06 chromosome, complete genome       |                  |                  |                                         |                   |             |
| NRPS                                                                      | 310,758          | 369,305          | vulnibactin                             | NRP               | 18%         |
| betalactone                                                               | 745,030          | 770,699          | -                                       | -                 | -           |
| <b>NRPS,prodigiosin</b>                                                   | <b>1,135,249</b> | <b>1,196,122</b> | <b>prodigiosin</b>                      | <b>Polyketide</b> | <b>100%</b> |
| thiopeptide                                                               | 1,781,008        | 1,807,452        | O-antigen                               | Saccharide        | 14%         |
| NRPS                                                                      | 2,463,253        | 2,508,769        | microcin H47                            | RiPP:Microcin     | 20%         |
| redox-cofactor                                                            | 2,581,007        | 2,603,169        | lankacidin C                            | NRP + Polyketide  | 13%         |
| NRPS                                                                      | 2,613,058        | 2,661,199        | -                                       | -                 | -           |
| NRPS                                                                      | 3,327,405        | 3,403,931        | ravidomycin                             | Polyketide        | 5%          |
| NRPS                                                                      | 4,881,352        | 4,925,290        | xantholipin                             | Polyketide        | 4%          |
| <i>Serratia marcescens</i> strain U36365 chromosome, complete genome      |                  |                  |                                         |                   |             |
| NRPS                                                                      | 288,656          | 329,856          | enterobactin                            | NRP               | 12%         |
| betalactone                                                               | 707,762          | 733,430          | -                                       | -                 | -           |

|                                                          |                  |                  |                    |                   |             |
|----------------------------------------------------------|------------------|------------------|--------------------|-------------------|-------------|
| RRE-containing                                           | 929,883          | 949,788          | lankacidin C       | NRP + Polyketide  | 13%         |
| <b>NRPS,prodigiosin</b>                                  | <b>1,102,061</b> | <b>1,162,917</b> | <b>prodigiosin</b> | <b>Polyketide</b> | <b>100%</b> |
| thiopeptide                                              | 1,745,141        | 1,771,583        | O-antigen          | Saccharide        | 14%         |
| NRPS                                                     | 2,337,950        | 2,383,545        | microcin H47       | RiPP:Microcin     | 20%         |
| redox-cofactor                                           | 2,464,738        | 2,486,900        | lankacidin C       | NRP + Polyketide  | 13%         |
| NRPS                                                     | 2,495,912        | 2,543,838        | vanchrobactin      | NRP               | 20%         |
| NRPS                                                     | 3,197,799        | 3,274,199        | ravidomycin        | Polyketide        | 5%          |
| NRPS                                                     | 4,574,674        | 4,618,612        | xantholipin        | Polyketide        | 4%          |
| <i>Serratia marcescens</i> 2020-O-9 DNA, complete genome |                  |                  |                    |                   |             |
| NRPS                                                     | 263,474          | 322,000          | vulnibactin        | NRP               | 18%         |
| NRPS-like,hserlactone                                    | 435,964          | 487,457          | -                  | -                 | -           |
| betalactone                                              | 713,611          | 739,280          | -                  | -                 | -           |
| <b>NRPS</b>                                              | <b>1,129,447</b> | <b>1,174,122</b> | <b>prodigiosin</b> | <b>Polyketide</b> | <b>12%</b>  |
| thiopeptide                                              | 1,827,365        | 1,853,806        | O-antigen          | Saccharide        | 14%         |
| NRPS                                                     | 2,453,865        | 2,500,576        | colicin V          | RiPP              | 1%          |
| RRE-containing                                           | 2,572,053        | 2,592,331        | lankacidin C       | NRP + Polyketide  | 13%         |
| NRPS                                                     | 2,610,205        | 2,654,669        | -                  | -                 | -           |
| NRPS                                                     | 3,343,672        | 3,392,693        | -                  | -                 | -           |
| NRPS                                                     | 4,863,317        | 4,920,677        | xenotetrapeptide   | NRP               | 100%        |
| <i>Serratia marcescens</i> AS-1 DNA, complete genome     |                  |                  |                    |                   |             |
| NRPS                                                     | 300,445          | 359,422          | vulnibactin        | NRP               | 18%         |
| NRPS-like                                                | 485,553          | 525,366          | -                  | -                 | -           |
| betalactone                                              | 768,048          | 793,718          | -                  | -                 | -           |
| <b>prodigiosin</b>                                       | <b>1,122,547</b> | <b>1,157,558</b> | <b>prodigiosin</b> | <b>Polyketide</b> | <b>100%</b> |
| thiopeptide                                              | 1,727,800        | 1,754,244        | O-antigen          | Saccharide        | 14%         |
| NRPS                                                     | 2,308,311        | 2,354,183        | microcin H47       | RiPP:Microcin     | 20%         |
| redox-cofactor                                           | 2,429,962        | 2,452,124        | lankacidin C       | NRP + Polyketide  | 13%         |

|                                                                                            |                  |                  |                    |                   |             |
|--------------------------------------------------------------------------------------------|------------------|------------------|--------------------|-------------------|-------------|
| NRPS                                                                                       | 2,480,922        | 2,527,585        | pyrronazol B       | NRP + Polyketide  | 9%          |
| NRPS                                                                                       | 4,530,605        | 4,574,540        | xantholipin        | Polyketide        | 4%          |
| <i>Serratia marcescens</i> ATCC 274 DNA, complete genome                                   |                  |                  |                    |                   |             |
| NRPS                                                                                       | 274,433          | 333,005          | vulnibactin        | NRP               | 12%         |
| NRPS-like                                                                                  | 458,734          | 498,640          | -                  | -                 | -           |
| betalactone                                                                                | 719,523          | 745,192          | -                  | -                 | -           |
| <b>prodigiosin</b>                                                                         | <b>1,087,690</b> | <b>1,122,710</b> | <b>prodigiosin</b> | <b>Polyketide</b> | <b>100%</b> |
| thiopeptide                                                                                | 1,732,825        | 1,759,268        | O-antigen          | Saccharide        | 14%         |
| NRPS                                                                                       | 2,311,585        | 2,358,592        | microcin E492      | RiPP:Microcin     | 12%         |
| redox-cofactor                                                                             | 2,433,927        | 2,456,089        | lankacidin C       | NRP + Polyketide  | 13%         |
| NRPS                                                                                       | 2,484,591        | 2,531,445        | pyrronazol B       | NRP + Polyketide  | 9%          |
| NRPS                                                                                       | 4,604,519        | 4,648,289        | xantholipin        | Polyketide        | 4%          |
| <i>Serratia marcescens</i> isolate GN26 chromosome                                         |                  |                  |                    |                   |             |
| <b>NRPS</b>                                                                                | <b>213,720</b>   | <b>258,396</b>   | <b>prodigiosin</b> | <b>Polyketide</b> | <b>12%</b>  |
| thiopeptide                                                                                | 896,329          | 922,771          | O-antigen          | Saccharide        | 14%         |
| NRPS                                                                                       | 1,465,562        | 1,512,278        | colicin V          | RiPP              | 1%          |
| RRE-containing                                                                             | 1,583,452        | 1,603,730        | lankacidin C       | NRP + Polyketide  | 13%         |
| NRPS                                                                                       | 1,618,612        | 1,664,234        | turnerbactin       | NRP               | 15%         |
| NRPS                                                                                       | 2,320,263        | 2,369,375        | -                  | -                 | -           |
| NRPS                                                                                       | 3,675,927        | 3,732,796        | xenotetrapeptide   | NRP               | 100%        |
| NRPS,T1PKS                                                                                 | 3,966,368        | 4,020,760        | -                  | -                 | -           |
| hserlactone                                                                                | 4,275,438        | 4,296,112        | -                  | -                 | -           |
| NRPS                                                                                       | 4,526,981        | 4,586,804        | vulnibactin        | NRP               | 18%         |
| NRPS-like                                                                                  | 4,699,145        | 4,742,132        | -                  | -                 | -           |
| betalactone                                                                                | 4,971,369        | 4,997,038        | -                  | -                 | -           |
| <i>Serratia marcescens</i> isolate PWN146_assembly genome assembly, chromosome: Chromosome |                  |                  |                    |                   |             |
| betalactone                                                                                | 60,892           | 86,559           | -                  | -                 | -           |



|                                                      |                  |                  |                         |                   |            |
|------------------------------------------------------|------------------|------------------|-------------------------|-------------------|------------|
| NRPS,T1PKS                                           | 546,260          | 622,499          | olimycin A / olimycin B | Polyketide        | 5%         |
| thiopeptide                                          | 1,196,198        | 1,222,640        | O-antigen               | Saccharide        | 14%        |
| NRPS                                                 | 1,775,544        | 1,822,844        | microcin E492           | RiPP:Microcin     | 18%        |
| RRE-containing                                       | 1,899,914        | 1,920,192        | lankacidin C            | NRP + Polyketide  | 13%        |
| T1PKS,NRPS                                           | 1,929,414        | 1,999,831        | pyrronazol B            | NRP + Polyketide  | 9%         |
| T1PKS,NRPS                                           | 2,596,947        | 2,660,035        | althiomycin             | NRP               | 100%       |
| NRPS                                                 | 2,726,955        | 2,772,474        | -                       | -                 | -          |
| siderophore                                          | 3,951,781        | 3,963,640        | -                       | -                 | -          |
| NRPS                                                 | 4,147,563        | 4,204,049        | xenotetrapeptide        | NRP               | 100%       |
| NRPS                                                 | 5,033,555        | 5,093,384        | vulnibactin             | NRP               | 18%        |
| RiPP-like                                            | 5,200,901        | 5,213,138        | -                       | -                 | -          |
| <i>Serratia marcescens</i> SM39 DNA, complete genome |                  |                  |                         |                   |            |
| betalactone                                          | 60,877           | 86,546           | -                       | -                 | -          |
| <b>NRPS</b>                                          | <b>476,718</b>   | <b>521,393</b>   | <b>prodigiosin</b>      | <b>Polyketide</b> | <b>12%</b> |
| thiopeptide                                          | 1,171,529        | 1,197,979        | O-antigen               | Saccharide        | 14%        |
| NRPS                                                 | 1,764,120        | 1,810,831        | colicin V               | RiPP              | 1%         |
| RRE-containing                                       | 1,882,308        | 1,902,586        | lankacidin C            | NRP + Polyketide  | 13%        |
| NRPS                                                 | 1,920,322        | 1,964,924        | -                       | -                 | -          |
| NRPS                                                 | 2,609,074        | 2,658,095        | -                       | -                 | -          |
| NRPS                                                 | 3,982,793        | 4,039,646        | xenotetrapeptide        | NRP               | 100%       |
| NRPS                                                 | 4,835,798        | 4,895,615        | vulnibactin             | NRP               | 18%        |
| NRPS-like,hserlactone                                | 5,008,228        | 5,060,300        | -                       | -                 | -          |
| <i>Serratia marcescens</i> SMB2099 complete genome   |                  |                  |                         |                   |            |
| NRPS                                                 | 319,342          | 378,038          | vulnibactin             | NRP               | 18%        |
| NRPS-like                                            | 492,592          | 535,160          | -                       | -                 | -          |
| betalactone                                          | 787,697          | 813,366          | -                       | -                 | -          |
| <b>NRPS</b>                                          | <b>1,154,309</b> | <b>1,198,985</b> | <b>prodigiosin</b>      | <b>Polyketide</b> | <b>12%</b> |

|                                                                       |                  |                  |                                |                         |            |
|-----------------------------------------------------------------------|------------------|------------------|--------------------------------|-------------------------|------------|
| thiopeptide                                                           | 1,804,409        | 1,830,851        | O-antigen                      | Saccharide              | 14%        |
| NRPS                                                                  | 2,373,641        | 2,420,358        | colicin V                      | RiPP                    | 1%         |
| RRE-containing                                                        | 2,491,533        | 2,511,811        | lankacidin C                   | NRP + Polyketide        | 13%        |
| NRPS                                                                  | 2,526,716        | 2,572,914        | vanchrobactin                  | NRP                     | 20%        |
| NRPS                                                                  | 3,193,684        | 3,242,795        | -                              | -                       | -          |
| NRPS                                                                  | 4,593,237        | 4,650,089        | xenoamicin A /<br>xenoamicin B | NRP:Cyclic depsipeptide | 20%        |
| NRPS,T1PKS                                                            | 4,881,757        | 4,936,379        | -                              | -                       | -          |
| <i>Serratia marcescens</i> strain 11/2010 chromosome, complete genome |                  |                  |                                |                         |            |
| NRPS                                                                  | 282,874          | 341,107          | vulnibactin                    | NRP                     | 18%        |
| NRPS-like                                                             | 454,922          | 497,028          | -                              | -                       | -          |
| betalactone                                                           | 701,219          | 726,888          | -                              | -                       | -          |
| thiopeptide                                                           | 1,733,192        | 1,759,635        | O-antigen                      | Saccharide              | 14%        |
| RRE-containing                                                        | 2,533,651        | 2,553,929        | lankacidin C                   | NRP + Polyketide        | 13%        |
| NRPS                                                                  | 2,574,600        | 2,622,335        | pyrronazol B                   | NRP + Polyketide        | 9%         |
| NRPS                                                                  | 3,269,618        | 3,355,308        | -                              | -                       | -          |
| lanthipeptide-class-i                                                 | 3,384,824        | 3,412,657        | yersiniabactin                 | NRP + Polyketide        | 2%         |
| NRPS,butyrolactone                                                    | 4,789,483        | 4,849,143        | xenotetrapeptide               | NRP                     | 100%       |
| <i>Serratia marcescens</i> strain 1140- chromosome, complete genome   |                  |                  |                                |                         |            |
| NRPS                                                                  | 292,397          | 350,100          | vulnibactin                    | NRP                     | 18%        |
| NRPS-like                                                             | 474,518          | 516,297          | -                              | -                       | -          |
| betalactone                                                           | 772,671          | 798,340          | -                              | -                       | -          |
| <b>NRPS</b>                                                           | <b>1,191,319</b> | <b>1,235,993</b> | <b>prodigiosin</b>             | <b>Polyketide</b>       | <b>12%</b> |
| thiopeptide                                                           | 1,833,431        | 1,859,872        | O-antigen                      | Saccharide              | 14%        |
| NRPS                                                                  | 2,548,192        | 2,594,891        | colicin V                      | RiPP                    | 1%         |
| RRE-containing                                                        | 2,679,562        | 2,699,840        | lankacidin C                   | NRP + Polyketide        | 13%        |
| NRPS                                                                  | 2,720,029        | 2,765,172        | pyrronazol B                   | NRP + Polyketide        | 9%         |

|           |           |           |                                            |                               |      |
|-----------|-----------|-----------|--------------------------------------------|-------------------------------|------|
| NRPS      | 3,407,335 | 3,456,885 | lipopolysaccharide                         | Saccharide:Lipopolysaccharide | 5%   |
| NRPS      | 3,520,077 | 3,576,934 | gobichelin A /<br>gobichelin B             | NRP                           | 11%  |
| RiPP-like | 3,918,624 | 3,931,170 | -                                          | -                             | -    |
| NRPS      | 4,831,097 | 4,888,949 | rhizomide A / rhizomide<br>B / rhizomide C | NRP                           | 100% |
